# Supplementary material for: Systematic review and meta‐analysis of protein intake to support muscle mass and function in healthy adults
Source: PubMed Central journal article supplement — J Cachexia Sarcopenia Muscle. 2022 Feb 20;13(2):795–810. doi: 10.1002/jcsm.12922 (PMC8978023; doi:10.1002/jcsm.12922), 2022-02-20
Supplement: JCSM-13-795-s001.pdf [file JCSM-13-795-s001.pdf]

# **Systematic review and meta-analysis of protein intake to support muscle mass and function in healthy adults**

Everson A Nunes<sup>1,2</sup>, Lauren Colenso-Semple<sup>1</sup>, Sean R McKellar<sup>1</sup>, Thomas Yau<sup>1</sup>, Muhammad Usman Ali<sup>3</sup>, Donna Fitzpatrick-Lewis<sup>3</sup>, Diana Sherifali<sup>4</sup>, Claire Gaudichon<sup>5</sup>, Daniel Tomé<sup>5</sup>, Philip J Atherton<sup>6</sup>, Maria Camprubi Robles<sup>7</sup>, Sandra Naranjo-Modad<sup>8</sup>, Michelle Braun<sup>9</sup>, Francesco Landi<sup>10</sup> and Stuart M Phillips<sup>1\*</sup>

<sup>1</sup> Exercise Metabolism Research Group, Department of Kinesiology, McMaster University, Hamilton, L8S 4L8, ON, Canada.

<sup>2</sup>Laboratory of Investigation of Chronic Diseases, Department of Physiological Sciences, Federal University of Santa Catarina, Florianópolis, 88040-900, SC, Brazil.

<sup>3</sup>McMaster Evidence Review and Synthesis Centre, McMaster University, Hamilton, L8S 4L8, ON, Canada.

<sup>4</sup>School of Nursing, Faculty of Health Sciences, McMaster University, Hamilton, L8S 4L8, ON, Canada.

<sup>5</sup>Université Paris-Saclay, AgroParisTech, INRAE, UMR PNCA, 75005 Paris, France

<sup>6</sup>MRC Versus Arthritis Centre of Excellence for Musculoskeletal Ageing Research (CMAR), NIHR Biomedical Research Centre, School of Medicine, University of Nottingham, Nottingham, NG7 2RD, England.

<sup>7</sup>Abbott Nutrition, Research and Development, Granada, Spain

<sup>8</sup>Givaudan, Research and Development, Avignon, France

<sup>9</sup>International Flavors & Fragrances, Research and Development, St. Louis, MO, USA

<sup>10</sup>Geriatric Internal Medicine Unit of the Geriatrics Department of the A. Gemelli University Hospital, Rome, IT

\* Corresponding author: S. M. Phillips, [phillis@mcmaster.ca](mailto:phillis@mcmaster.ca) and [publications@ilsieurope.be](mailto:publications@ilsieurope.be); Tel.: +1-905-525-9140 (ext. 24465). Mailing address: Department of Kinesiology, Ivor Wynne Centre, McMaster University, 1280 Main St. West, Hamilton, ON L8S 4L8.

|                        | Random sequence generation (selection bias) | Allocation concealment (selection bias) | Blinding of participants and personnel (performance bias) | Blinding of outcome assessment (detection bias) | Incomplete outcome data (attrition bias) | Selective reporting (reporting bias) | Other bias |
|------------------------|---------------------------------------------|-----------------------------------------|-----------------------------------------------------------|-------------------------------------------------|------------------------------------------|--------------------------------------|------------|
| Aas 2020               | +                                           | +                                       | -                                                         | -                                               | +                                        | +                                    | +          |
| Aleman-Mateo 2014      | +                                           | +                                       | -                                                         | -                                               | +                                        | +                                    | +          |
| Amasene 2019           | +                                           | +                                       | -                                                         | -                                               | +                                        | +                                    | +          |
| Antonio 2014           | ?                                           | -                                       | -                                                         | -                                               | +                                        | +                                    | +          |
| Antonio 2015           | ?                                           | -                                       | -                                                         | -                                               | +                                        | +                                    | +          |
| Aristizabal 2015       | +                                           | +                                       | +                                                         | +                                               | +                                        | +                                    | +          |
| Arnarson 2013          | +                                           | +                                       | +                                                         | +                                               | +                                        | +                                    | +          |
| Babault 2014           | +                                           | +                                       | +                                                         | +                                               | +                                        | +                                    | +          |
| Bartholomae 2019       | +                                           | -                                       | ?                                                         | ?                                               | +                                        | +                                    | +          |
| Bridge 2019            | +                                           | ?                                       | ?                                                         | ?                                               | +                                        | +                                    | +          |
| Brown 2004             | +                                           | +                                       | +                                                         | +                                               | +                                        | +                                    | +          |
| Burke 2001             | +                                           | +                                       | +                                                         | +                                               | +                                        | +                                    | +          |
| Campbell 2018          | ?                                           | ?                                       | ?                                                         | ?                                               | +                                        | +                                    | +          |
| Candow 2006            | +                                           | +                                       | +                                                         | +                                               | +                                        | +                                    | +          |
| Candow 2006a           | +                                           | +                                       | +                                                         | +                                               | +                                        | +                                    | +          |
| Chale 2013             | +                                           | +                                       | +                                                         | +                                               | +                                        | +                                    | +          |
| Coburn 2006            | +                                           | +                                       | +                                                         | +                                               | +                                        | +                                    | +          |
| Deibert 2011           | +                                           | -                                       | -                                                         | ?                                               | +                                        | +                                    | +          |
| Dillon 2009            | +                                           | +                                       | +                                                         | +                                               | +                                        | +                                    | +          |
| Dulac 2020             | +                                           | +                                       | +                                                         | +                                               | +                                        | +                                    | +          |
| Eliot 2008             | +                                           | +                                       | +                                                         | +                                               | +                                        | +                                    | +          |
| Erskine 2012           | +                                           | +                                       | +                                                         | +                                               | +                                        | +                                    | +          |
| Farup 2014             | +                                           | +                                       | +                                                         | +                                               | +                                        | +                                    | +          |
| Gryson 2014            | +                                           | +                                       | +                                                         | +                                               | +                                        | +                                    | +          |
| Hartman 2007           | +                                           | ?                                       | ?                                                         | ?                                               | +                                        | +                                    | +          |
| Haun 2018              | +                                           | +                                       | +                                                         | +                                               | +                                        | +                                    | +          |
| Herda 2013             | +                                           | +                                       | +                                                         | +                                               | +                                        | +                                    | +          |
| Hida 2012              | +                                           | +                                       | +                                                         | +                                               | +                                        | +                                    | +          |
| Hoffman 2007           | +                                           | +                                       | +                                                         | +                                               | +                                        | +                                    | +          |
| Hoffman 2009           | +                                           | ?                                       | ?                                                         | ?                                               | +                                        | +                                    | +          |
| Iglay 2009             | +                                           | -                                       | -                                                         | ?                                               | +                                        | +                                    | +          |
| Kerksick 2006          | +                                           | +                                       | +                                                         | +                                               | +                                        | +                                    | +          |
| Kim 2014               | +                                           | +                                       | +                                                         | +                                               | +                                        | +                                    | +          |
| Kim 2020               | +                                           | -                                       | -                                                         | ?                                               | +                                        | +                                    | +          |
| Kirmse 2019            | +                                           | +                                       | +                                                         | +                                               | +                                        | +                                    | +          |
| Leenders 2013          | +                                           | +                                       | +                                                         | +                                               | +                                        | +                                    | +          |
| Lockwood 2017          | +                                           | +                                       | +                                                         | +                                               | +                                        | +                                    | +          |
| Maesta 2007            | +                                           | +                                       | +                                                         | +                                               | +                                        | +                                    | +          |
| Mobley 2017            | +                                           | +                                       | +                                                         | +                                               | +                                        | +                                    | +          |
| Mori 2018              | ?                                           | ?                                       | -                                                         | ?                                               | +                                        | +                                    | +          |
| Nabuco 2018            | +                                           | +                                       | +                                                         | +                                               | +                                        | +                                    | +          |
| Nabuco 2019a           | +                                           | +                                       | +                                                         | +                                               | +                                        | +                                    | +          |
| Nabuco 2019c           | +                                           | +                                       | +                                                         | +                                               | +                                        | +                                    | +          |
| Naclerio 2017          | +                                           | +                                       | +                                                         | +                                               | +                                        | +                                    | +          |
| Nacleno 2017a          | +                                           | +                                       | +                                                         | +                                               | +                                        | +                                    | +          |
| Nahas 2019             | +                                           | ?                                       | ?                                                         | ?                                               | +                                        | +                                    | +          |
| Nakayama 2020          | +                                           | +                                       | +                                                         | +                                               | +                                        | +                                    | +          |
| Negro 2014             | +                                           | -                                       | -                                                         | ?                                               | ?                                        | +                                    | +          |
| Norton 2016            | +                                           | +                                       | +                                                         | +                                               | +                                        | +                                    | +          |
| Oertzen-Hagemann 2019  | +                                           | +                                       | +                                                         | +                                               | +                                        | +                                    | +          |
| Ormsbee 2018           | +                                           | ?                                       | ?                                                         | ?                                               | ?                                        | +                                    | +          |
| Orsatti 2018           | +                                           | +                                       | +                                                         | +                                               | +                                        | +                                    | +          |
| Ottestad 2017          | +                                           | +                                       | +                                                         | +                                               | +                                        | +                                    | +          |
| Ozan 2020              | -                                           | ?                                       | -                                                         | ?                                               | ?                                        | +                                    | +          |
| Paoli 2015             | +                                           | -                                       | -                                                         | ?                                               | ?                                        | ?                                    | +          |
| Pihoker 2019           | +                                           | +                                       | -                                                         | -                                               | ?                                        | ?                                    | +          |
| Planella-Farrugia 2019 | +                                           | -                                       | -                                                         | ?                                               | ?                                        | +                                    | +          |
| Rankin 2004            | -                                           | -                                       | -                                                         | ?                                               | ?                                        | +                                    | +          |
| Reidy 2016             | +                                           | +                                       | +                                                         | +                                               | +                                        | +                                    | +          |
| Rossato 2017           | +                                           | ?                                       | ?                                                         | ?                                               | ?                                        | +                                    | +          |
| Rozenek 2002           | +                                           | +                                       | +                                                         | +                                               | +                                        | +                                    | +          |
| Sharp 2018             | +                                           | +                                       | +                                                         | +                                               | +                                        | +                                    | +          |
| Snijders 2015          | +                                           | +                                       | +                                                         | +                                               | +                                        | +                                    | +          |
| Spillane 2016          | +                                           | +                                       | +                                                         | +                                               | +                                        | +                                    | +          |
| Taylor 2016            | +                                           | +                                       | +                                                         | +                                               | +                                        | +                                    | +          |
| van Dongen 2020        | +                                           | -                                       | -                                                         | ?                                               | ?                                        | +                                    | +          |
| Vangsoe 2018           | +                                           | ?                                       | ?                                                         | ?                                               | ?                                        | +                                    | +          |
| Verdijk 2009           | +                                           | ?                                       | +                                                         | +                                               | +                                        | +                                    | +          |
| Votek 2013             | +                                           | +                                       | +                                                         | +                                               | +                                        | +                                    | +          |
| Walker 2010            | +                                           | +                                       | +                                                         | ?                                               | ?                                        | +                                    | +          |
| Watanabe 2018          | +                                           | +                                       | +                                                         | +                                               | +                                        | +                                    | +          |
| Weisgarber 2012        | +                                           | +                                       | +                                                         | +                                               | +                                        | +                                    | +          |
| Willoughby 2007        | +                                           | +                                       | +                                                         | +                                               | +                                        | +                                    | +          |
| Zhu 2015               | +                                           | +                                       | +                                                         | +                                               | +                                        | +                                    | +          |

**Supplementary Figure 1** – Risk of bias analysis of all studies included in the meta-analysis. (+) – Circles filled in green = Low risk of bias; (?) – Circles filled in yellow = Unclear risk of bias; (-) – Circles filled in red = High risk of bias.

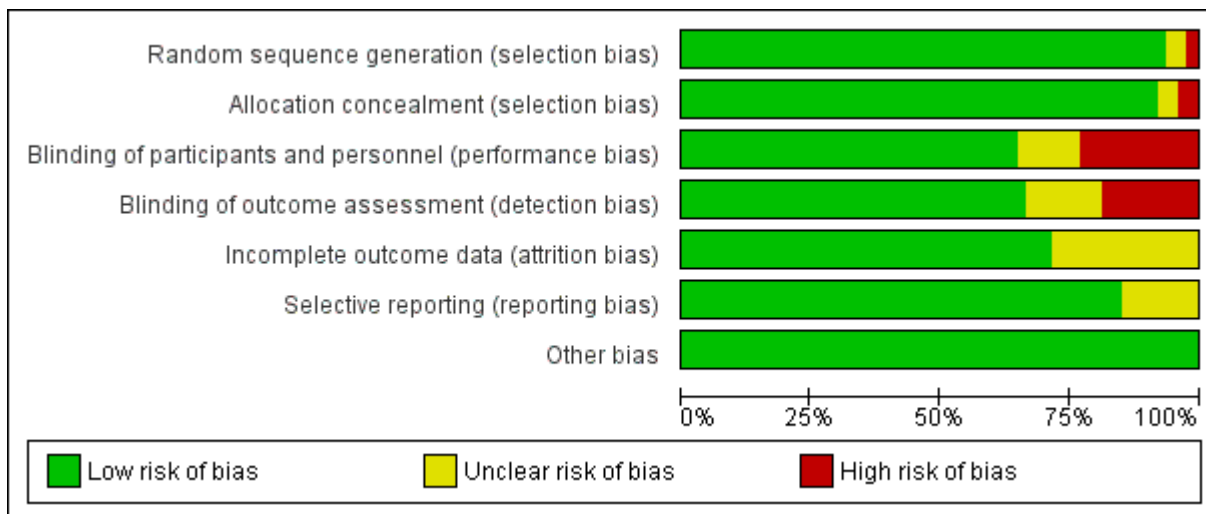

**Supplementary Figure 2** – Summary of risk of bias analysis showing the percentage of studies with potential unclear or high risk of selection, performance, detection, attrition, reporting, or other bias.

## Lean body mass gain with additional protein ingestion by resistance exercise enrolment

Study - Group

Weight SMD [95% CI]

## RCT with Resistance Exercise

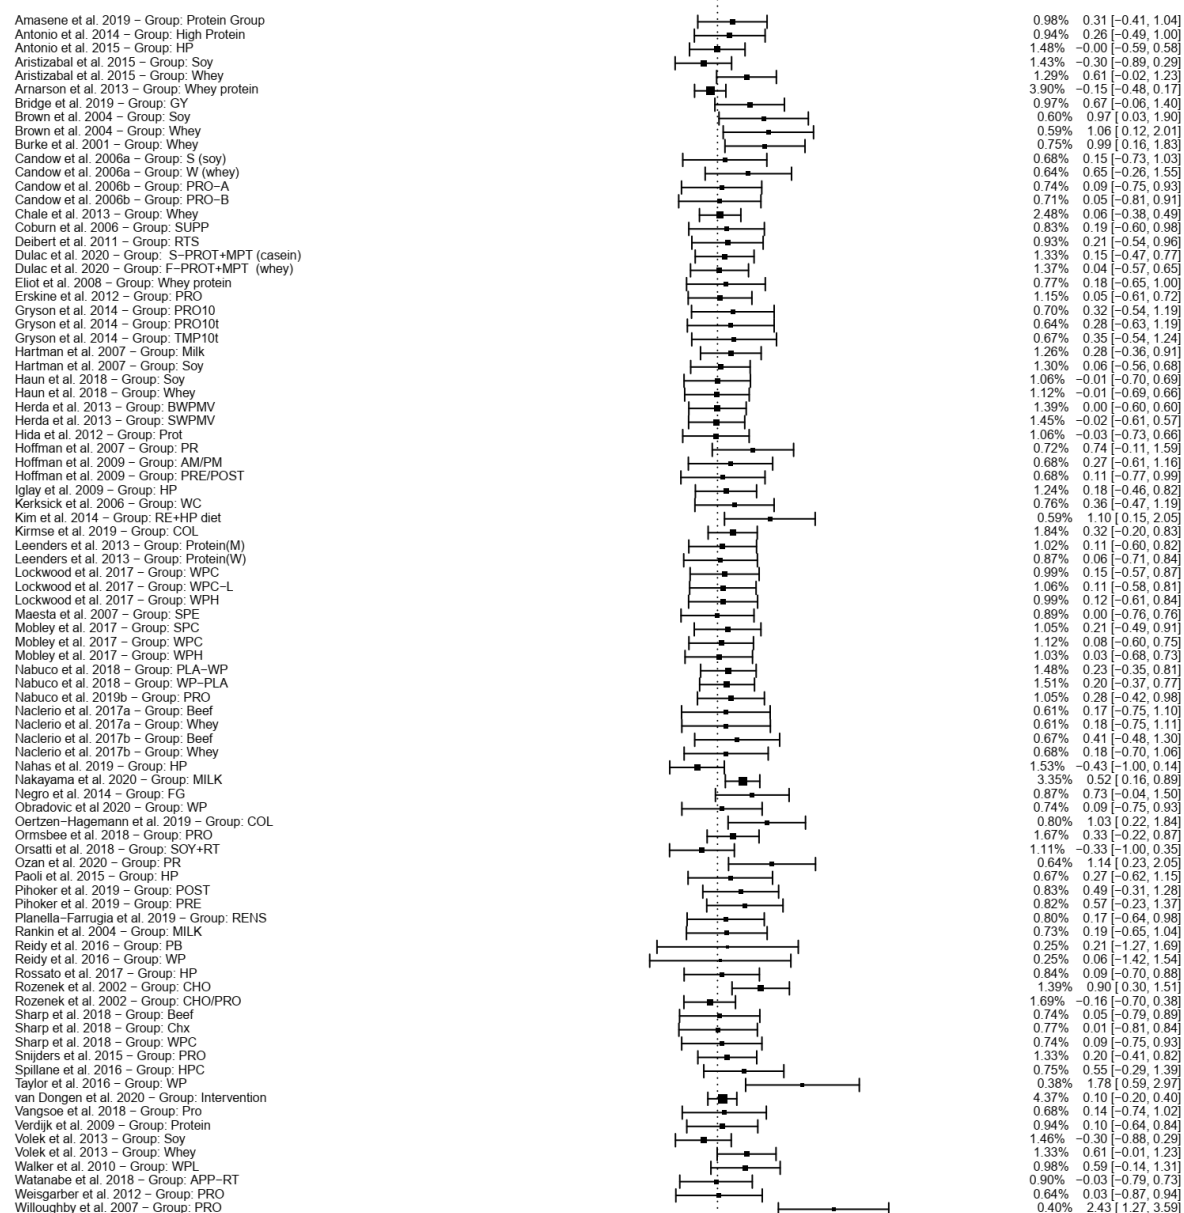RE Multi-Level Model for Subgroup (Q = 88.77, df = 86, p = 0.398; I<sup>2</sup> = 6.24%)

0.22 [0.14, 0.30]

## RCT without Resistance Exercise

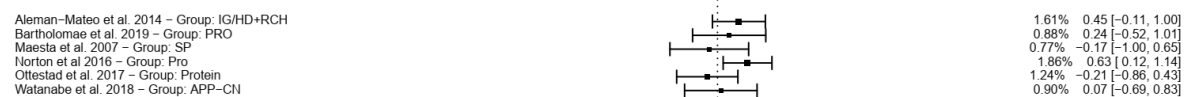RE Multi-Level Model for Subgroup (Q = 6.36, df = 6, p = 0.384; I<sup>2</sup> = 25.06%)

0.21 [-0.15, 0.58]

RE Multi-level model (Q = 94.69, df = 92, p = 0.403; Overall I<sup>2</sup> = 6.67%)

100.00% 0.22 [0.15, 0.30]

Test for Subgroup Differences: Q<sub>M</sub> = 2.28, df = 1, p = 0.13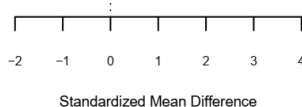

**Supplementary Figure 3** – Forest plot showing results of the three-level random-effects meta-analysis of studies testing the effects of ingesting additional protein on adults' lean body or muscle mass, including or not a resistance exercise program.

## Lean body mass gain with resistance exercise plus protein ingestion by Age

Study - Group

Weight SMD [95% CI]

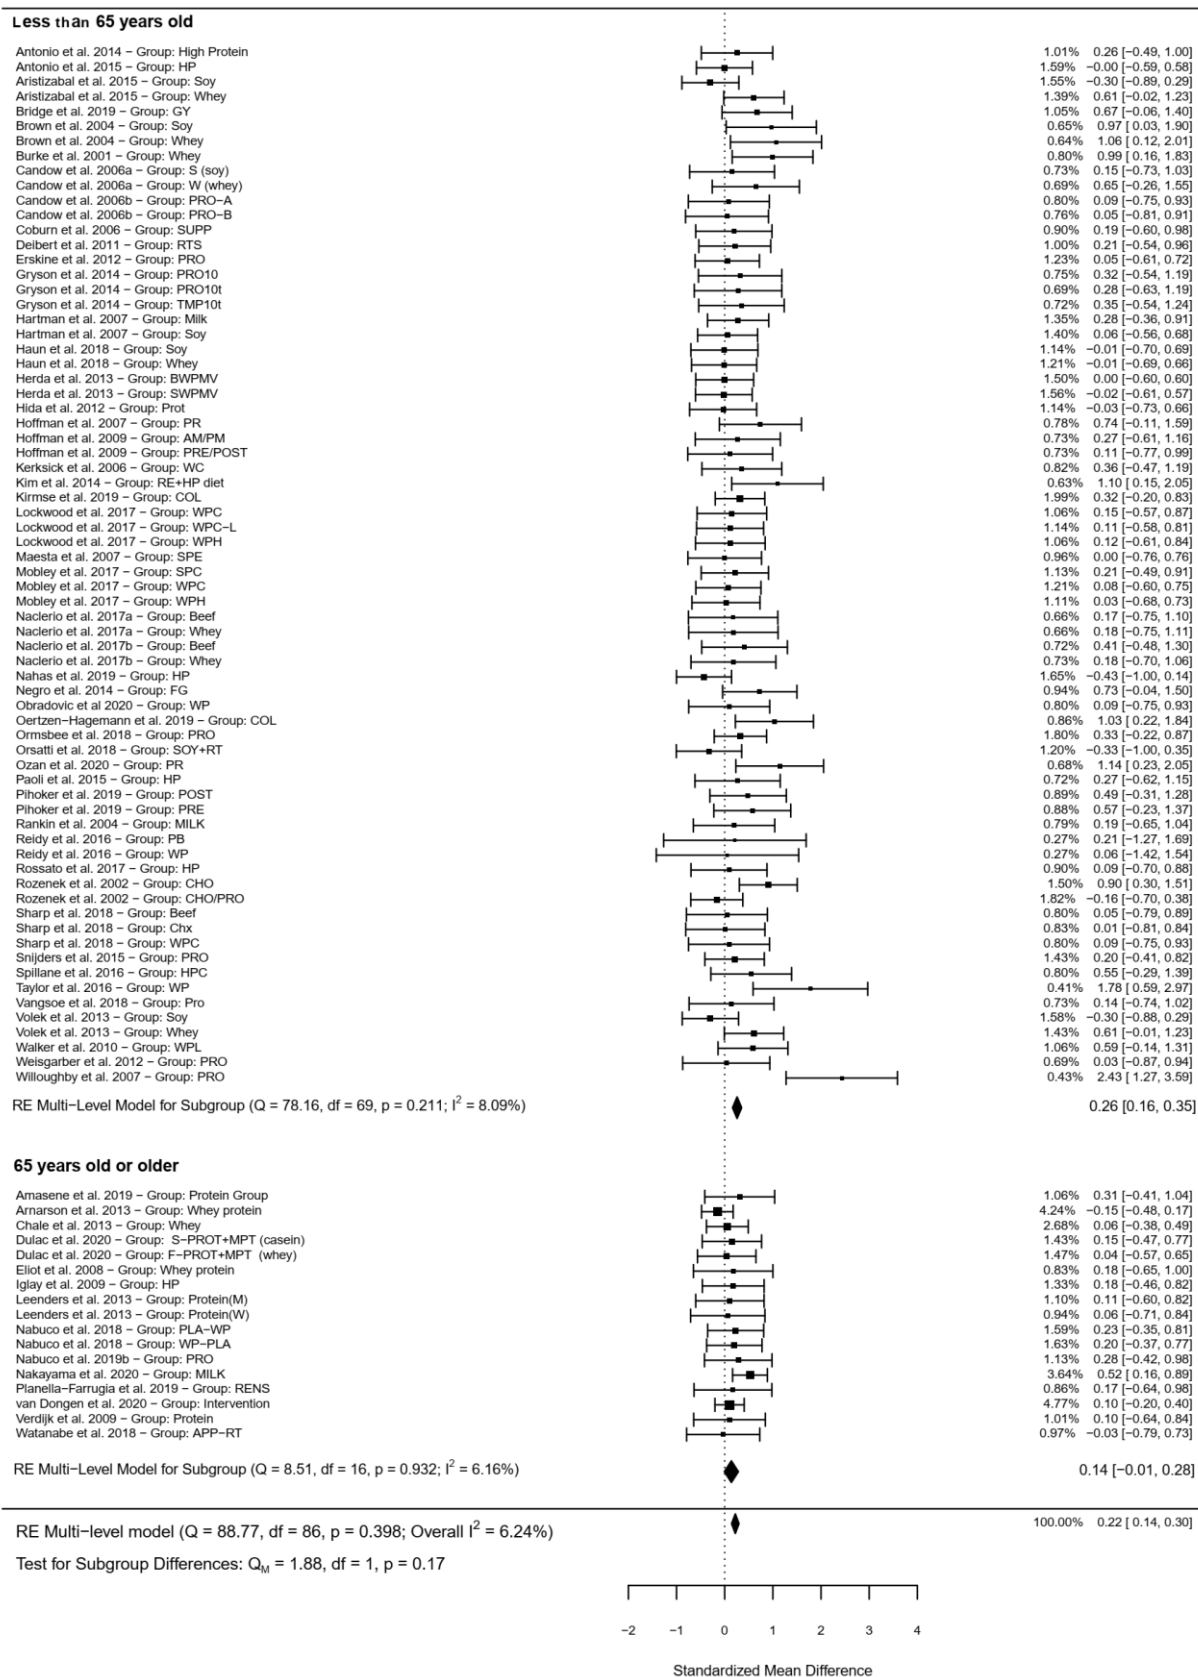

**Supplementary Figure 4** – Forest plot showing results of the three-level random-effects meta-analysis of studies testing the effects of ingesting additional protein on adults' lean body or muscle mass of subjects categorized by age < 65 or ≥ 65 years old in studies including a resistance exercise program.

## Bench strength gain with resistance exercise and additional protein ingestion

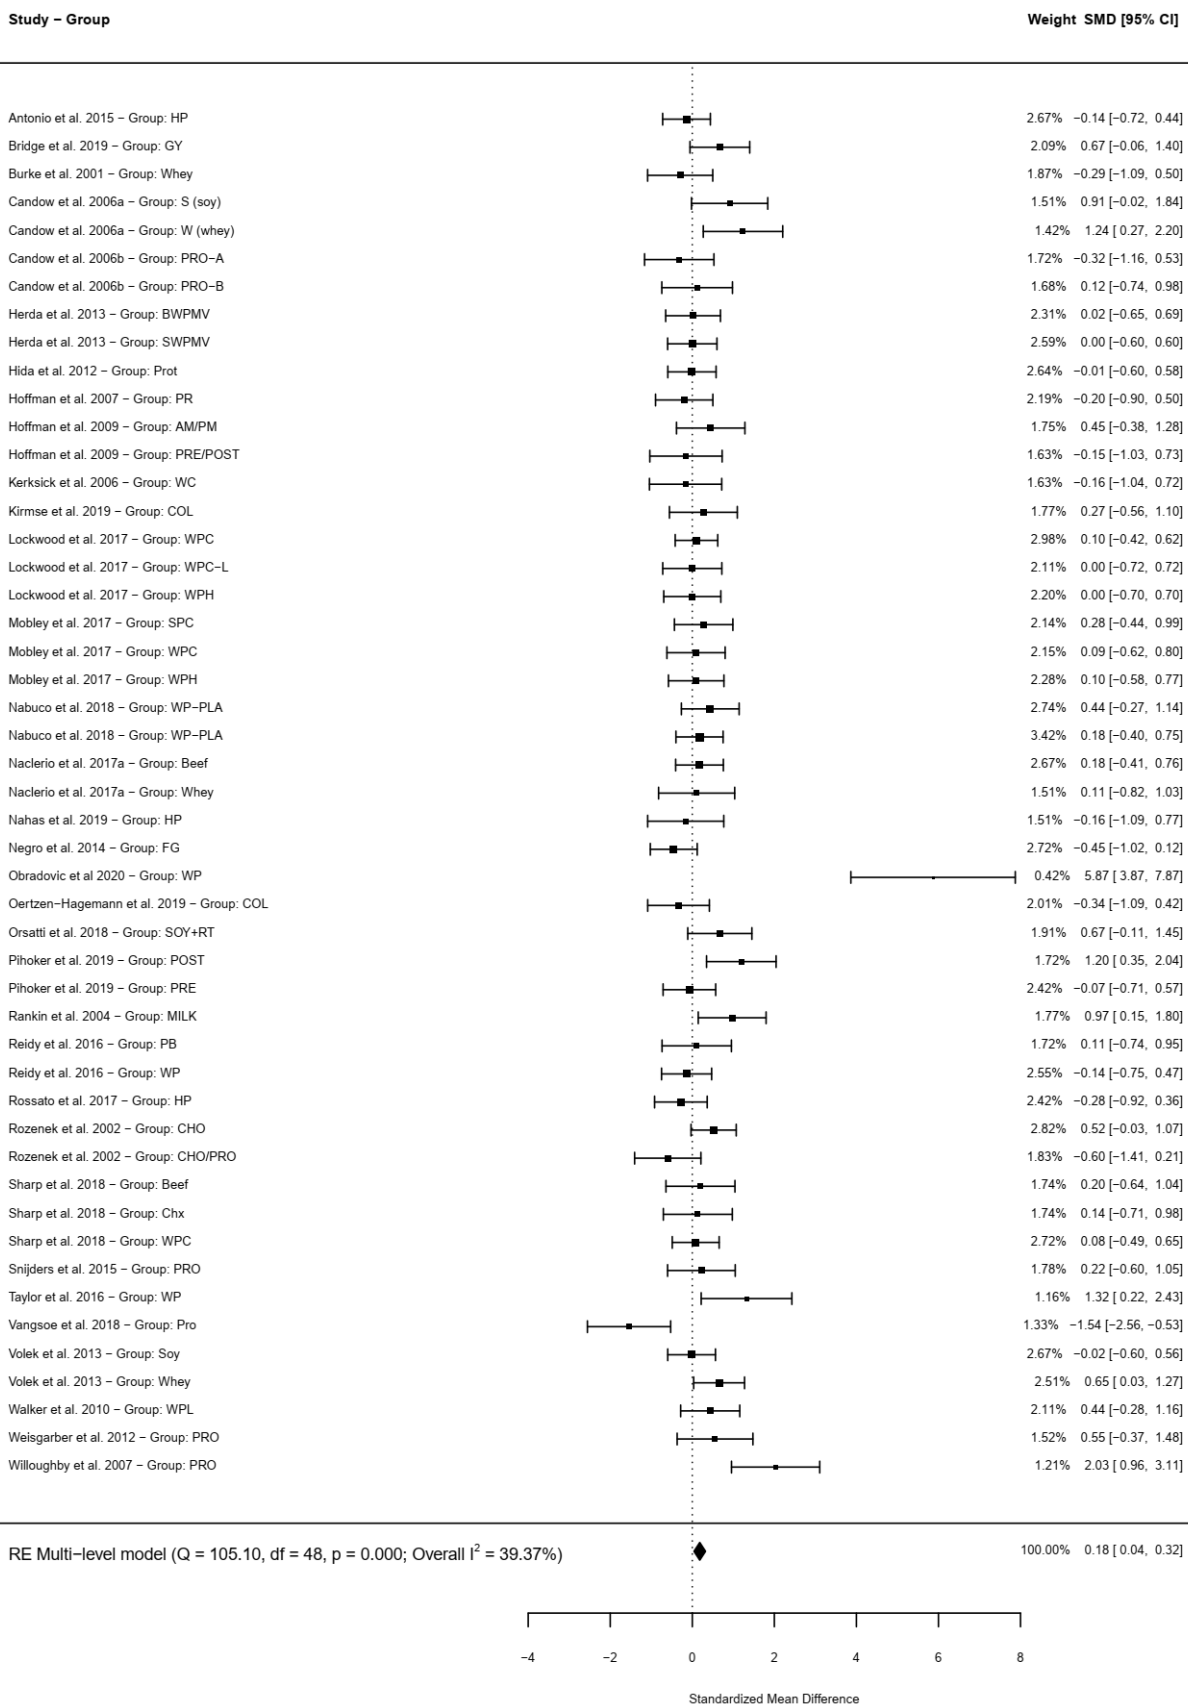

**Supplementary Figure 5** – Forest plot showing results of the three-level random-effects meta-analysis of studies testing the effects of ingesting additional protein and resistance exercise on adults' bench press strength.

## Lower body strength gain with additional protein ingestion by enrolment in resistance exercise training

Study – Group

Weight SMD [95% CI]

## RCT with Resistance Exercise

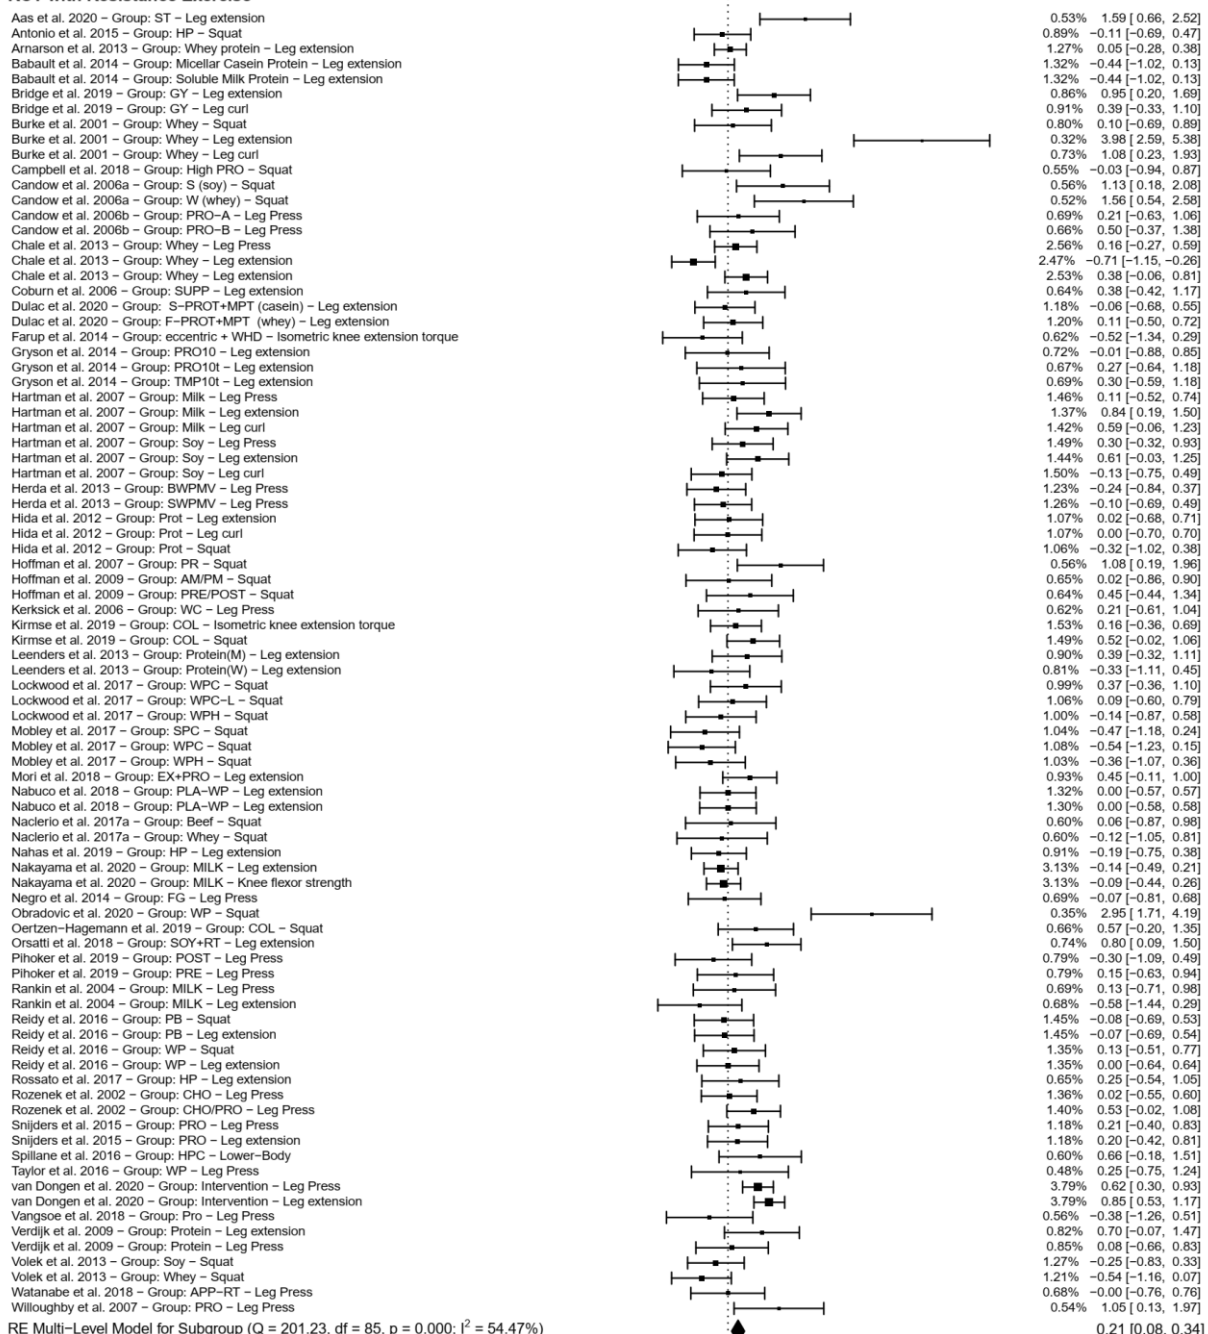

## RCT without Resistance Exercise

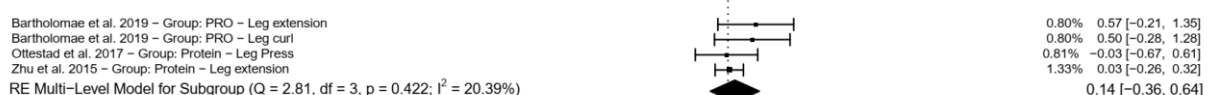RE Multi-level model (Q = 204.23, df = 89, p = 0.000; Overall I<sup>2</sup> = 52.77%)Test for Subgroup Differences: Q<sub>tt</sub> = 0.02, df = 1, p = 0.88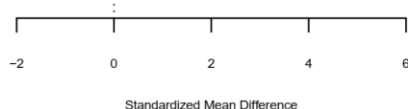

**Supplementary Figure 6** – Forest plot showing results of the three-level random-effects meta-analysis of studies testing the effects of ingesting additional protein on adults' lower-body strength by the presence or not of resistance exercise training in a study research protocol.

## Lower body strength gain with resistance exercise plus protein ingestion by Age Study – Group

Weight SMD [95% CI]

### Less than 65 years old

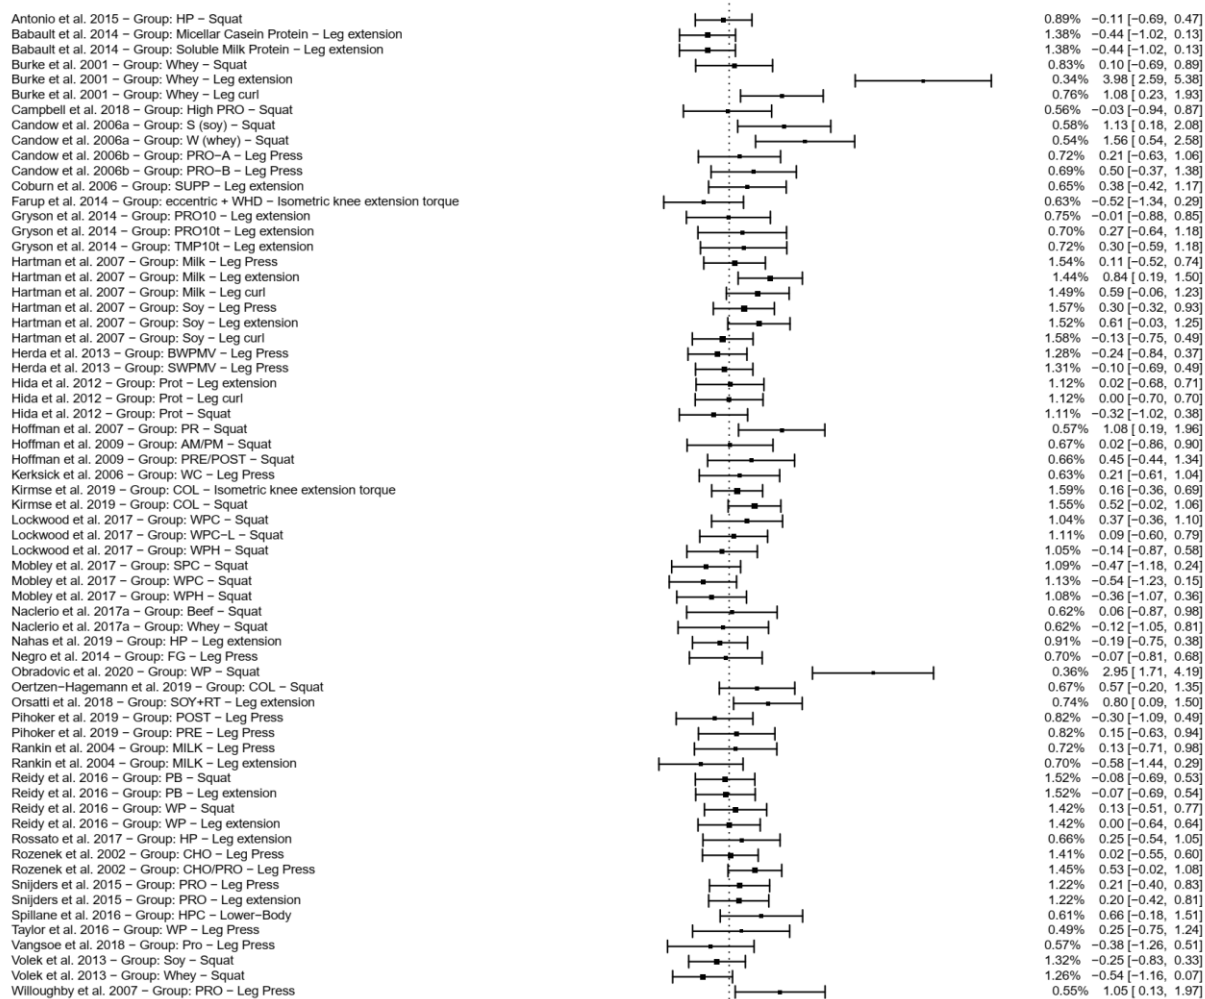RE Multi-Level Model for Subgroup (Q = 134.22, df = 64, p = 0.000; I<sup>2</sup> = 52.78%)

### 65 years old or older

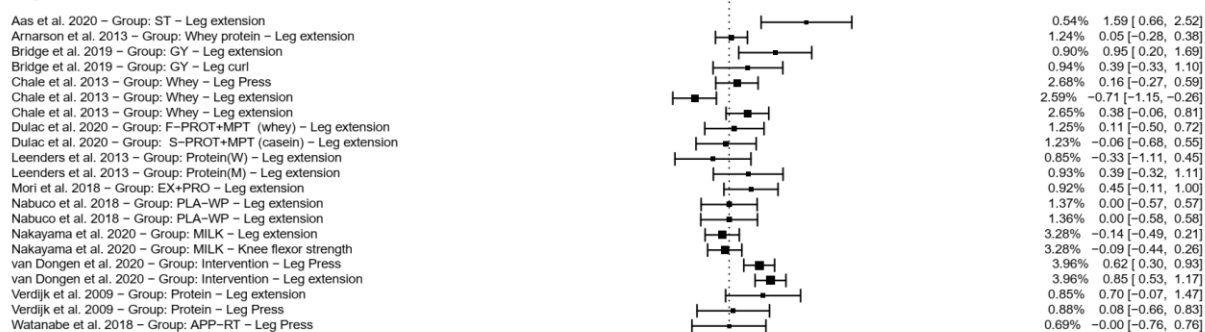RE Multi-Level Model for Subgroup (Q = 65.44, df = 20, p = 0.000; I<sup>2</sup> = 60.57%)RE Multi-level model (Q = 201.23, df = 85, p = 0.000; Overall I<sup>2</sup> = 54.47%)Test for Subgroup Differences: Q<sub>M</sub> = 0.20, df = 1, p = 0.66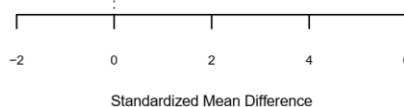

**Supplementary Figure 7** – Forest plot showing results of the three-level random-effects meta-analysis of studies reporting daily protein ingestion and testing the effects of ingesting additional protein and resistance exercise on adults' lower body strength by age < 65 or ≥ 65 years old.



## Lower body strength gain with resistance exercise plus protein ingestion by daily protein ingestion

Study – Group

Weight SMD [95% CI]

## Higher or equal to 1.60 g/kg/day

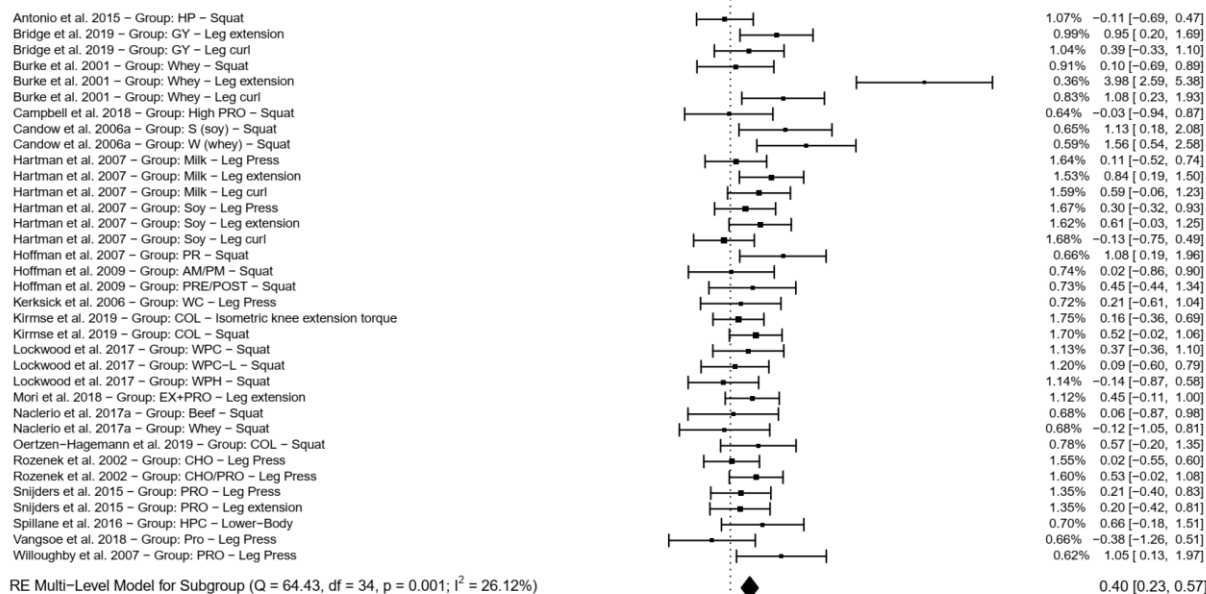

## Between 1.2 and 1.59 g/kg/day

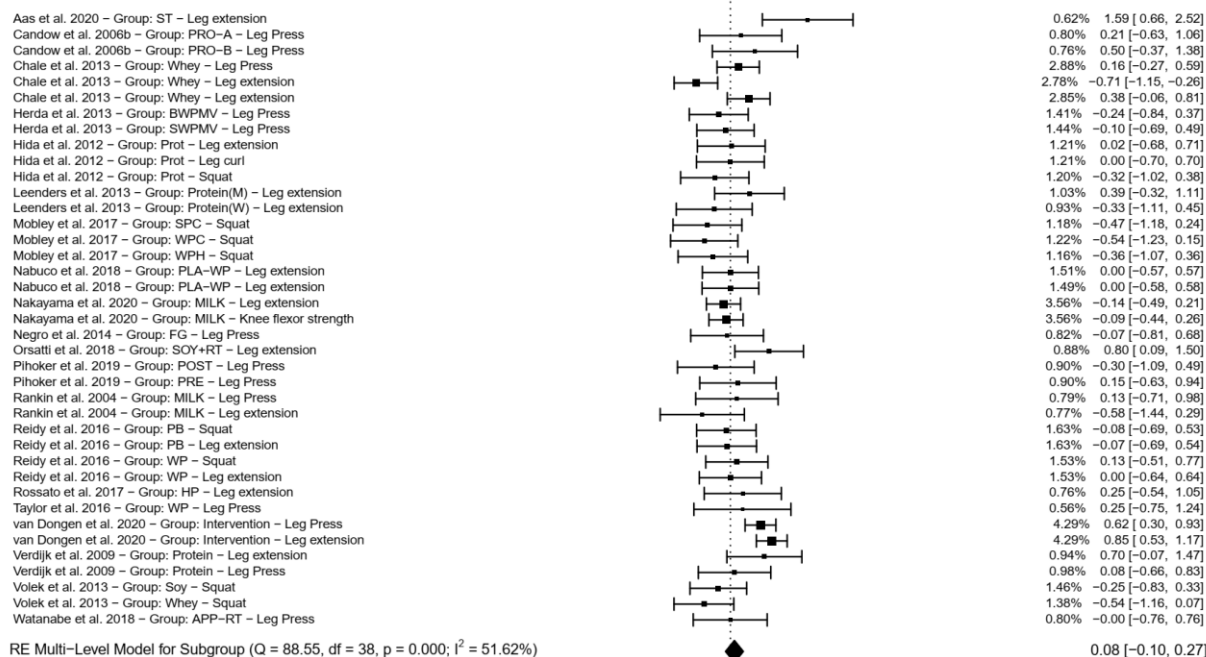

## Less than 1.2 g/kg/day

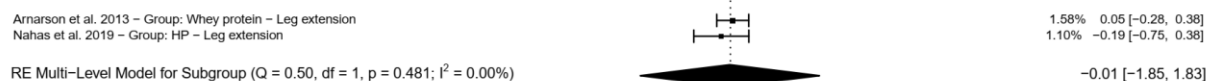RE Multi-level model (Q = 169.03, df = 75, p = 0.000; Overall I<sup>2</sup> = 49.49%)Test for Subgroup Differences: Q<sub>M</sub> = 7.28, df = 1, p = 0.01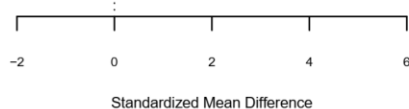

**Supplementary Figure 8** – Forest plot showing results of the three-level random-effects meta-analysis of studies reporting daily protein ingestion and testing the effects of ingesting additional protein on adults' lower body strength by the level of protein ingestion.

### Handgrip strength gains with protein supplementation by resistance exercise training

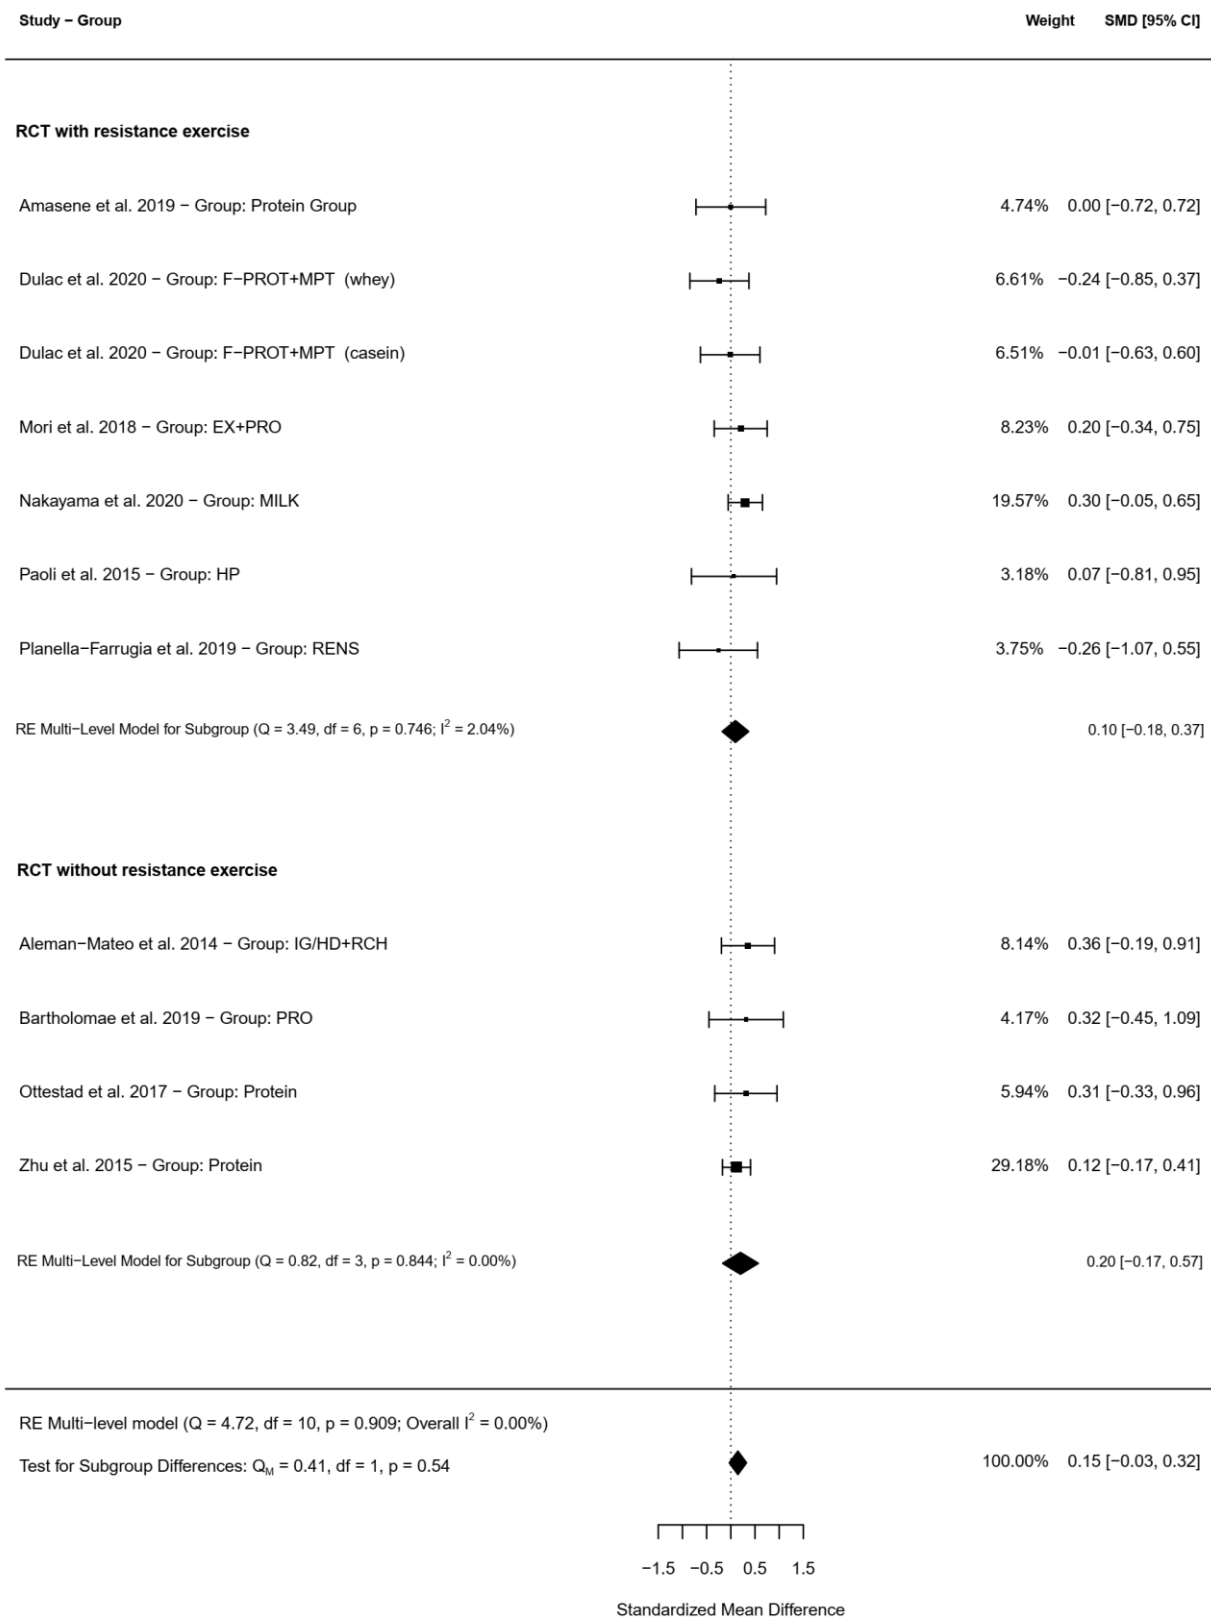

**Supplementary Figure 9** – Forest plot showing results of the three-level random-effects meta-analysis of studies testing the effects of ingesting additional protein on adults' handgrip strength by the presence or not of resistance exercise training in a study research protocol.

Physical function with protein supplementation by resistance exercise training

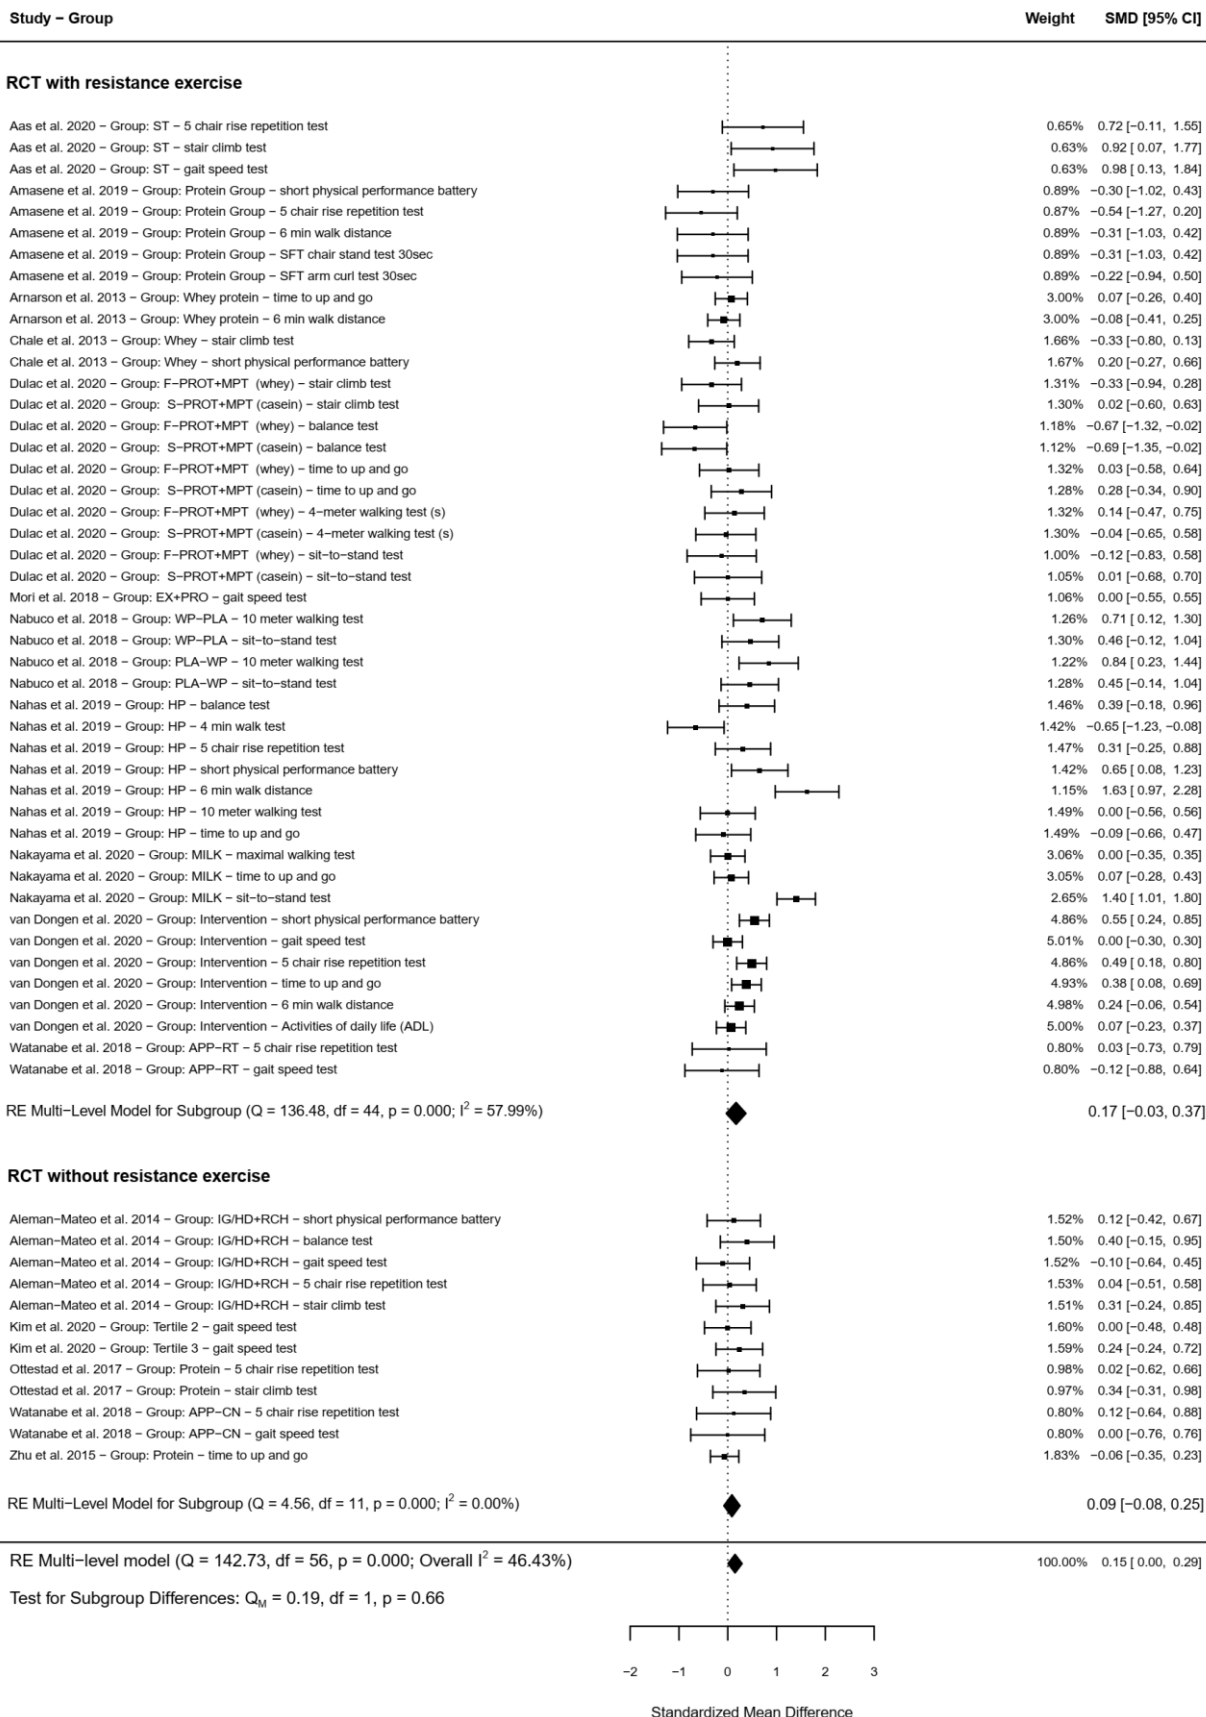

**Supplementary Figure 10** – Forest plot showing results of the three-level random-effects meta-analysis of studies testing the effects of ingesting additional protein on adults' physical testing performance by the presence or not of resistance exercise training in a study research protocol.

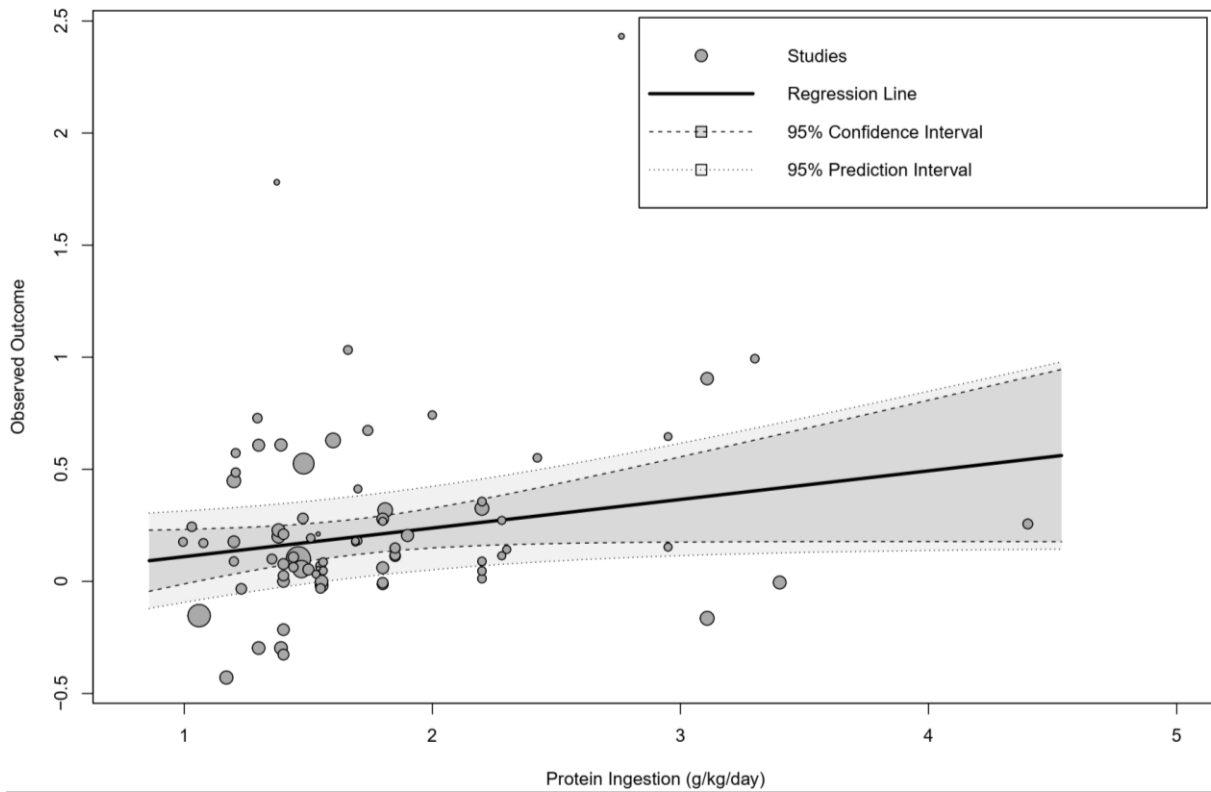

**Supplementary Figure 11** – Bubble plot of three-level meta-regression analysis of the main effect on lean body mass vs. total daily protein ingestion (g/kg/day) in studies testing interventions to increase protein ingestion in all included RCT reporting protein ingestion.

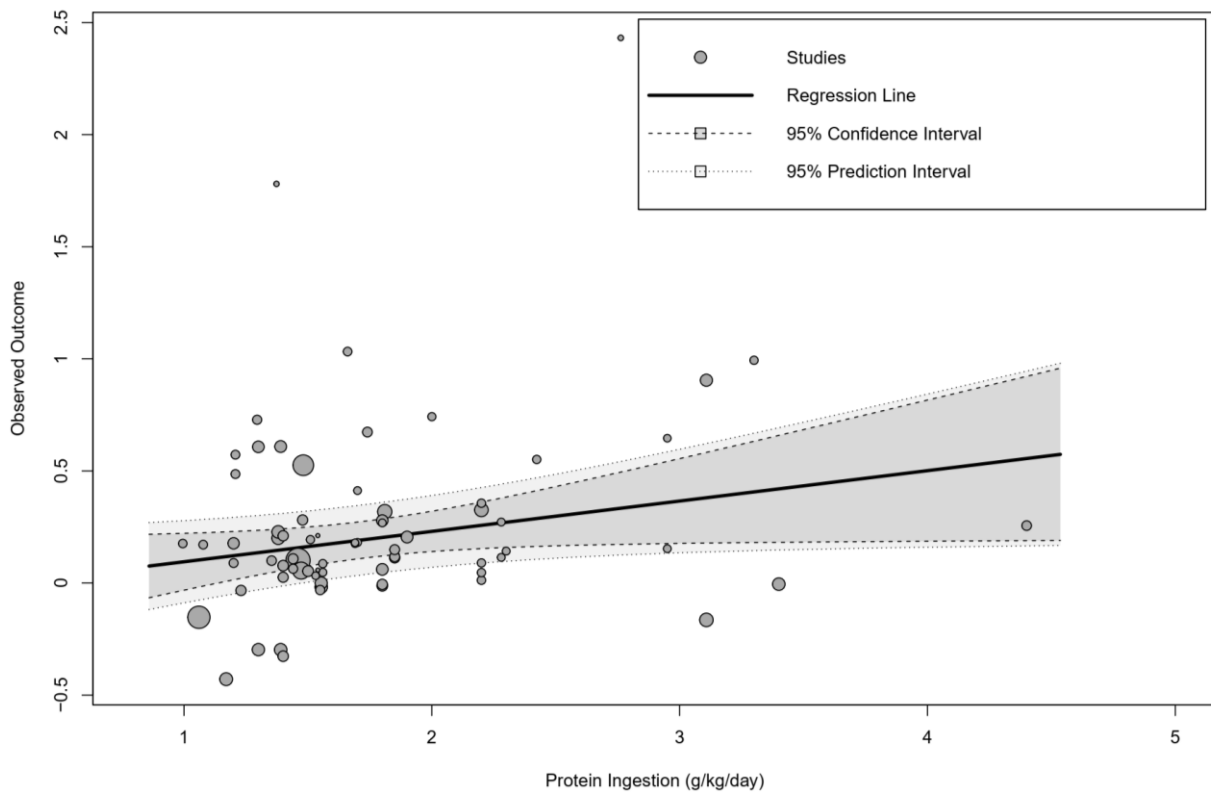

**Supplementary Figure 12** – Bubble plot of three-level meta-regression analysis of the main effect on lean body mass vs. total daily protein ingestion (g/kg/day) in studies testing interventions to increase protein ingestion in all included RCT using resistance exercise training and reporting protein ingestion.

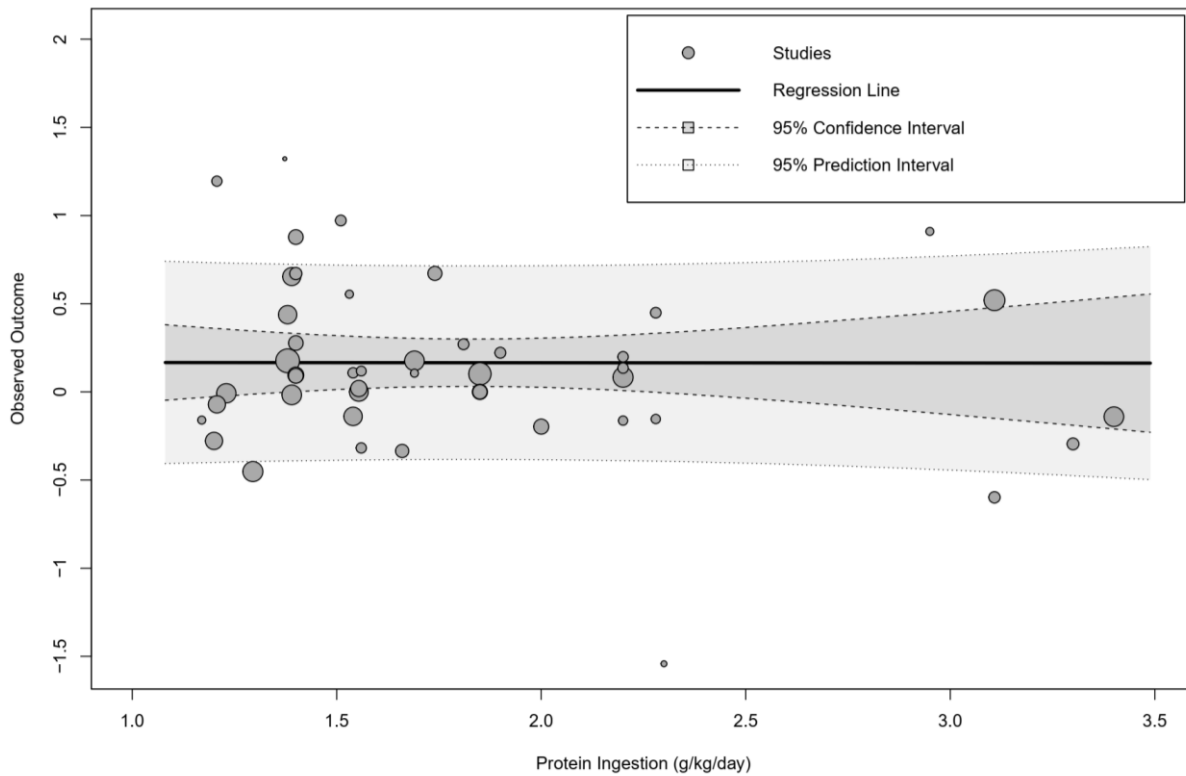

**Supplementary Figure 13** – Bubble plot of three-level meta-regression analysis of the main effect on bench press strength vs. total daily protein ingestion (g/kg/day) in studies testing interventions to increase protein ingestion in all included RCT reporting protein ingestion.

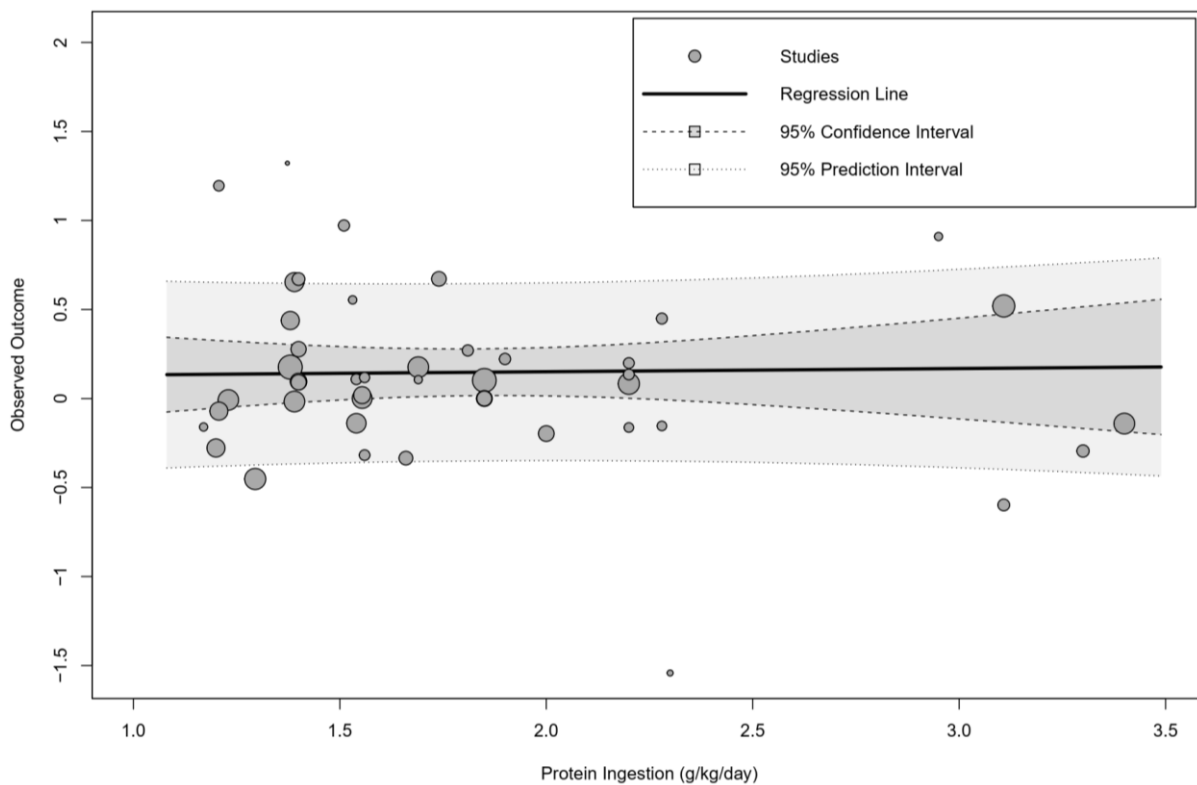

**Supplementary Figure 14** – Bubble plot of three-level meta-regression analysis of the main effect on bench press strength vs. total daily protein ingestion (g/kg/day) in studies testing interventions to increase protein ingestion in all included RCT using resistance exercise training and reporting protein ingestion.

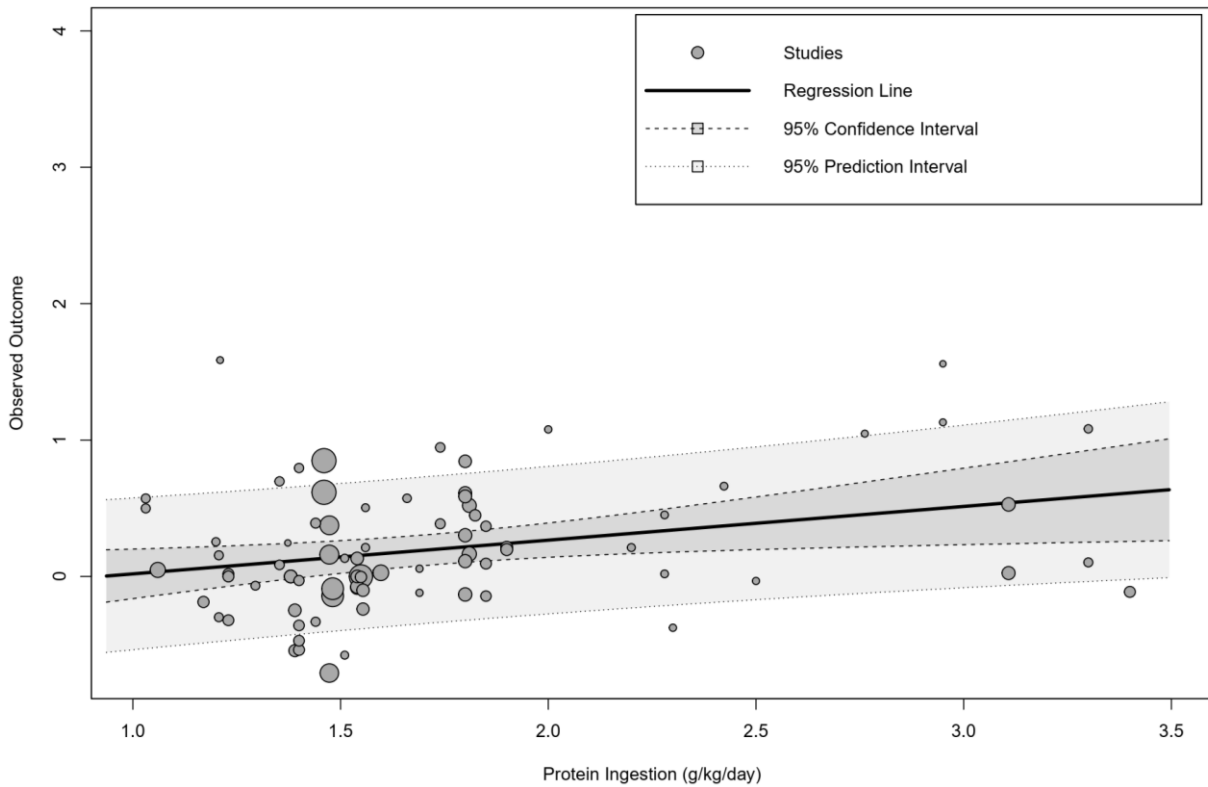

**Supplementary Figure 15** – Bubble plot of three-level meta-regression analysis of the main effect on lower-body strength vs. total daily protein ingestion (g/kg/day) in studies testing interventions to increase protein ingestion in all included RCT reporting protein ingestion.

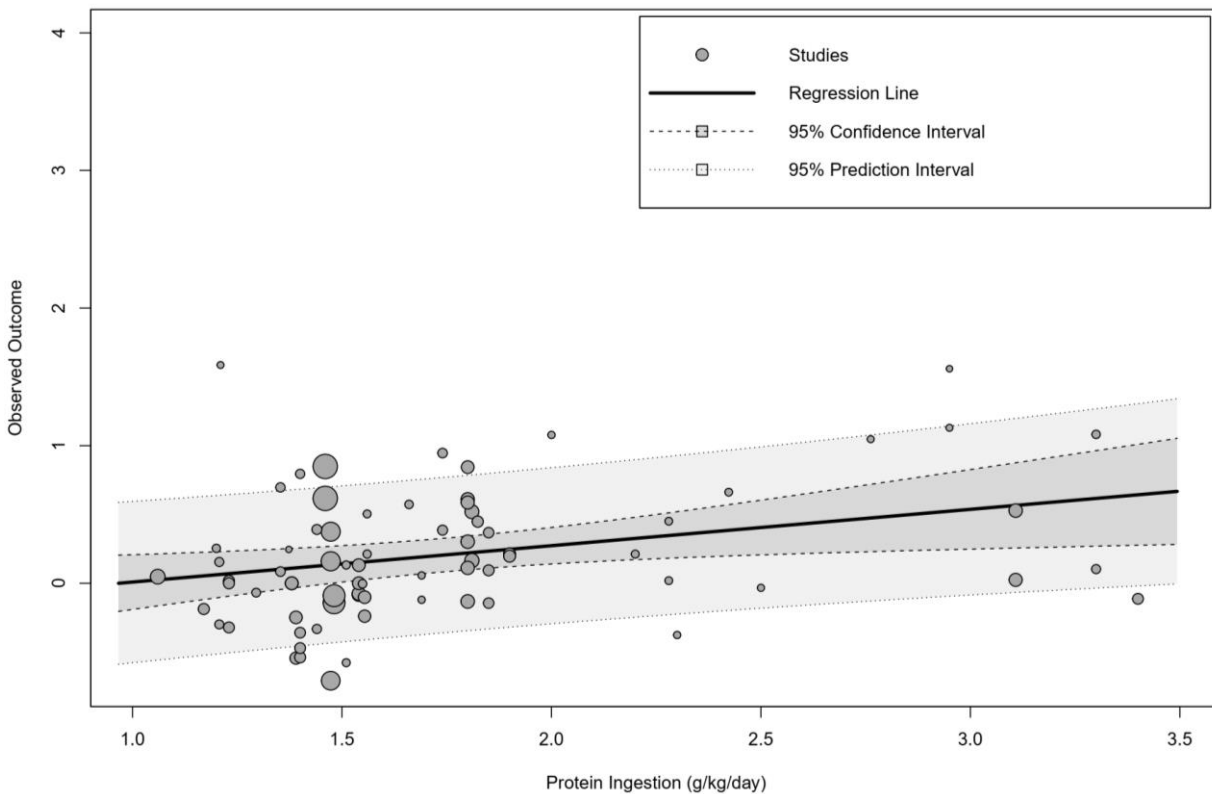

**Supplementary Figure 16** – Bubble plot of three-level meta-regression analysis of the main effect on lower-body strength vs. total daily protein ingestion (g/kg/day) in studies testing interventions to increase protein ingestion in all included RCT using resistance exercise training and reporting protein ingestion.

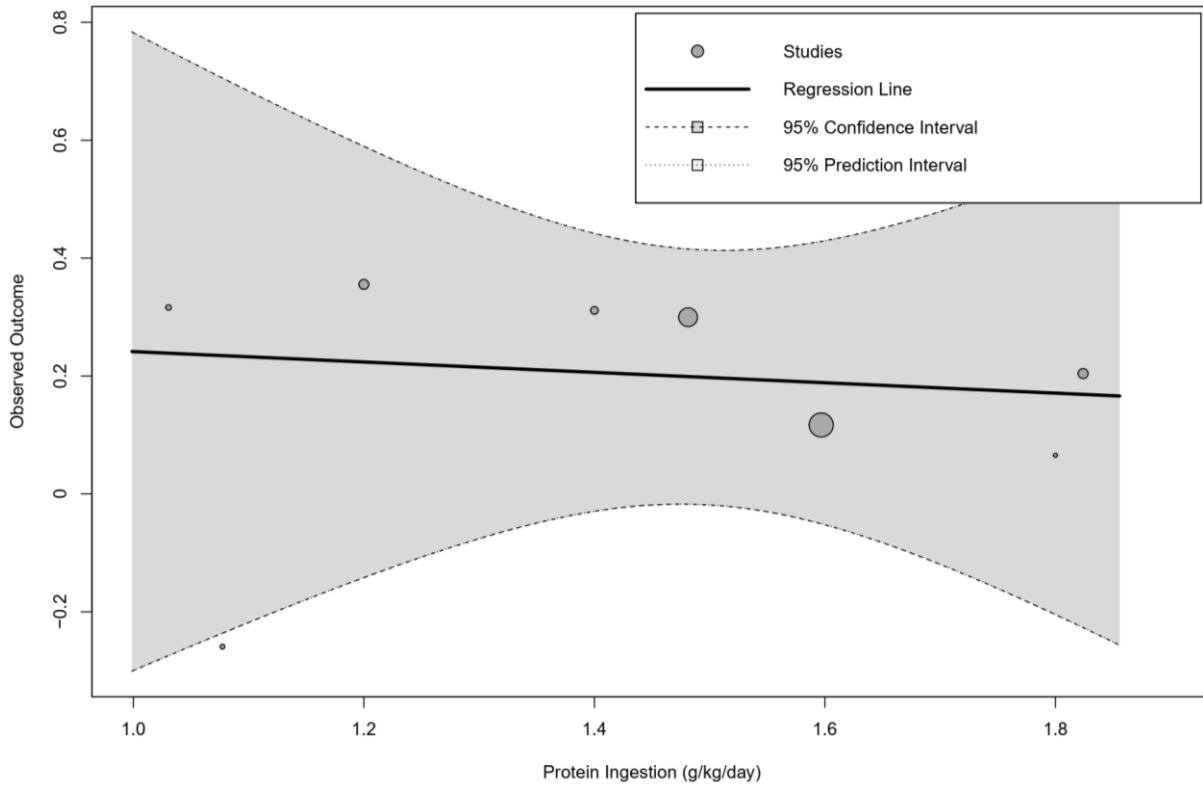

**Supplementary Figure 17** – Bubble plot of three-level meta-regression analysis of the main effect on handgrip strength vs. total daily protein ingestion (g/kg/day) in studies testing interventions to increase protein ingestion in all included RCT reporting protein ingestion.

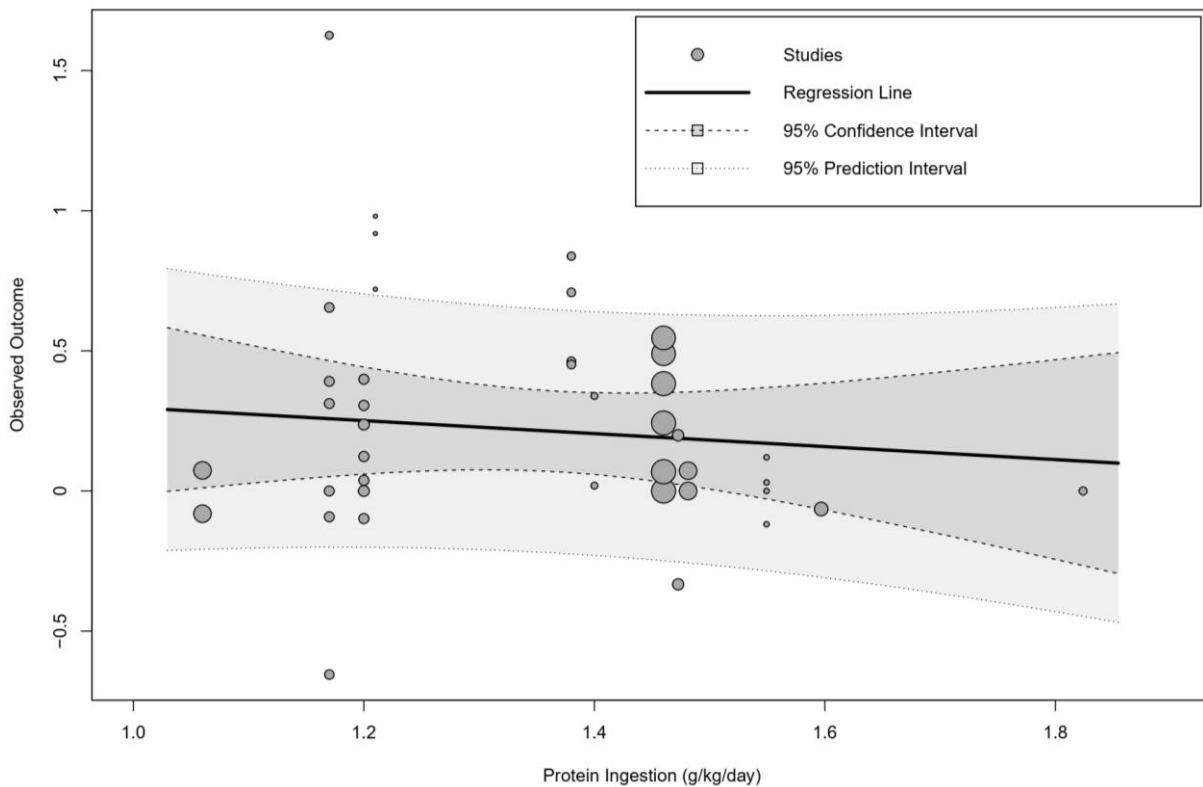

**Supplementary Figure 18** – Bubble plot of three-level meta-regression analysis of the main effect on performance in physical and functional tests vs. total daily protein ingestion (g/kg/day) in studies testing interventions to increase protein ingestion in all included RCT reporting protein ingestion.

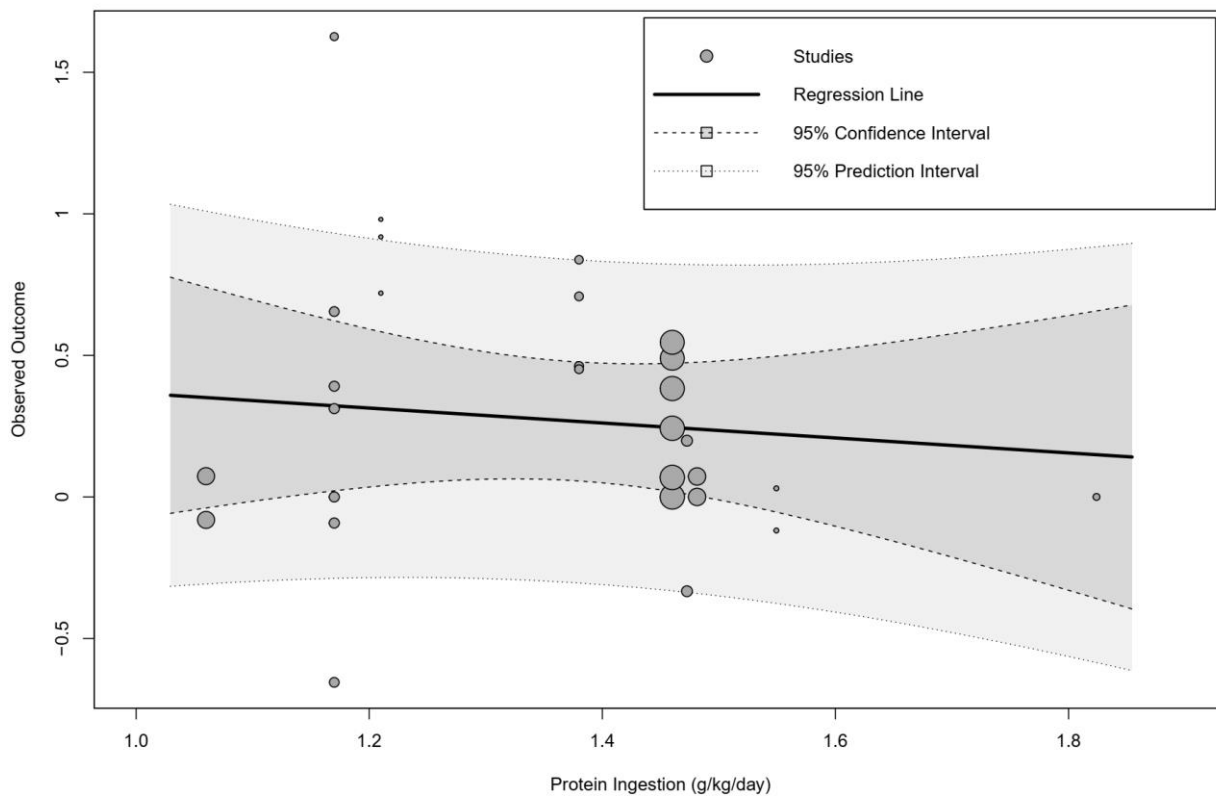

**Supplementary Figure 19** – Bubble plot of three-level meta-regression analysis of the main effect on performance in physical and functional tests vs. total daily protein ingestion (g/kg/day) in studies testing interventions to increase protein ingestion in all included RCT using resistance exercise training and reporting protein ingestion.



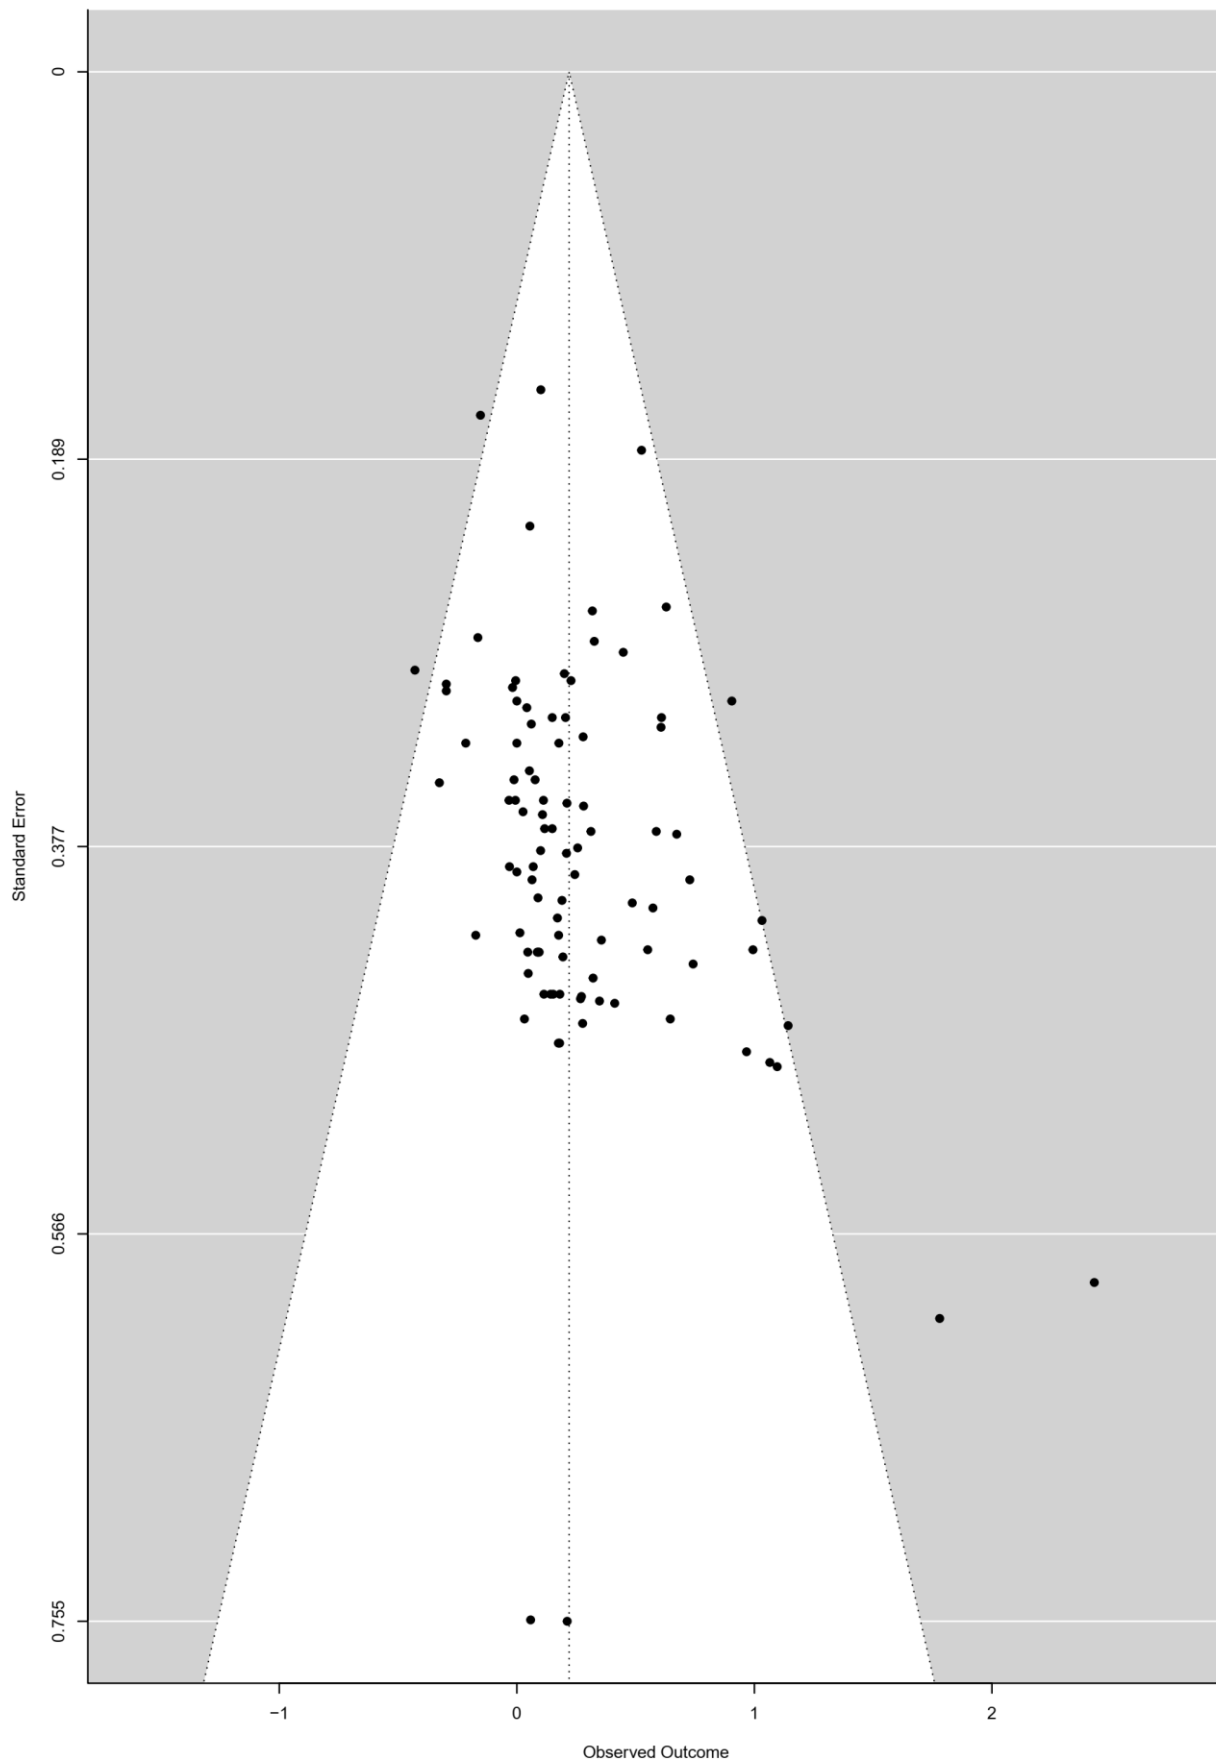

**Supplementary Figure 20** – Funnel plot showing results studies testing the effects of ingesting additional protein on adults' lean body or muscle mass including or not a resistance exercise program.

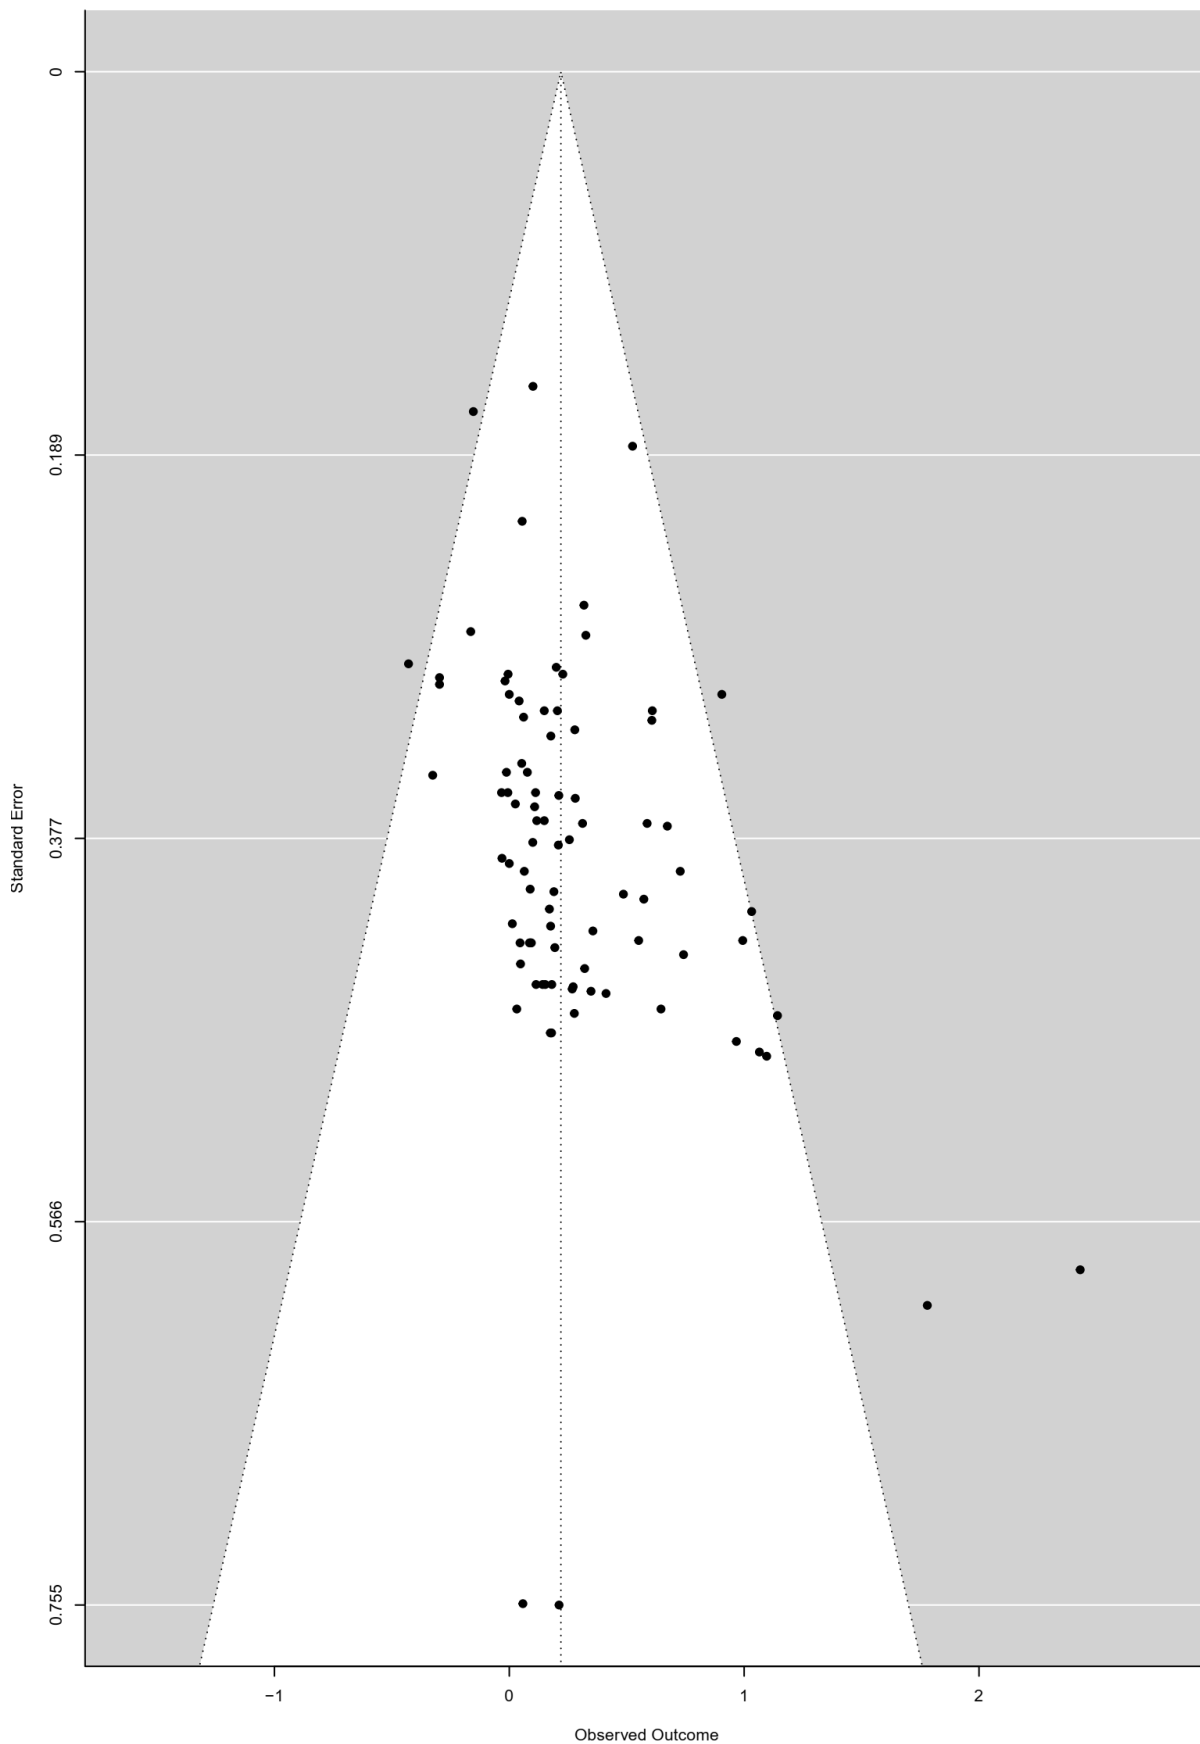

**Supplementary Figure 21** – Funnel plot showing results studies testing the effects of ingesting additional protein on adults' lean body or muscle mass only in studies including a resistance exercise program.

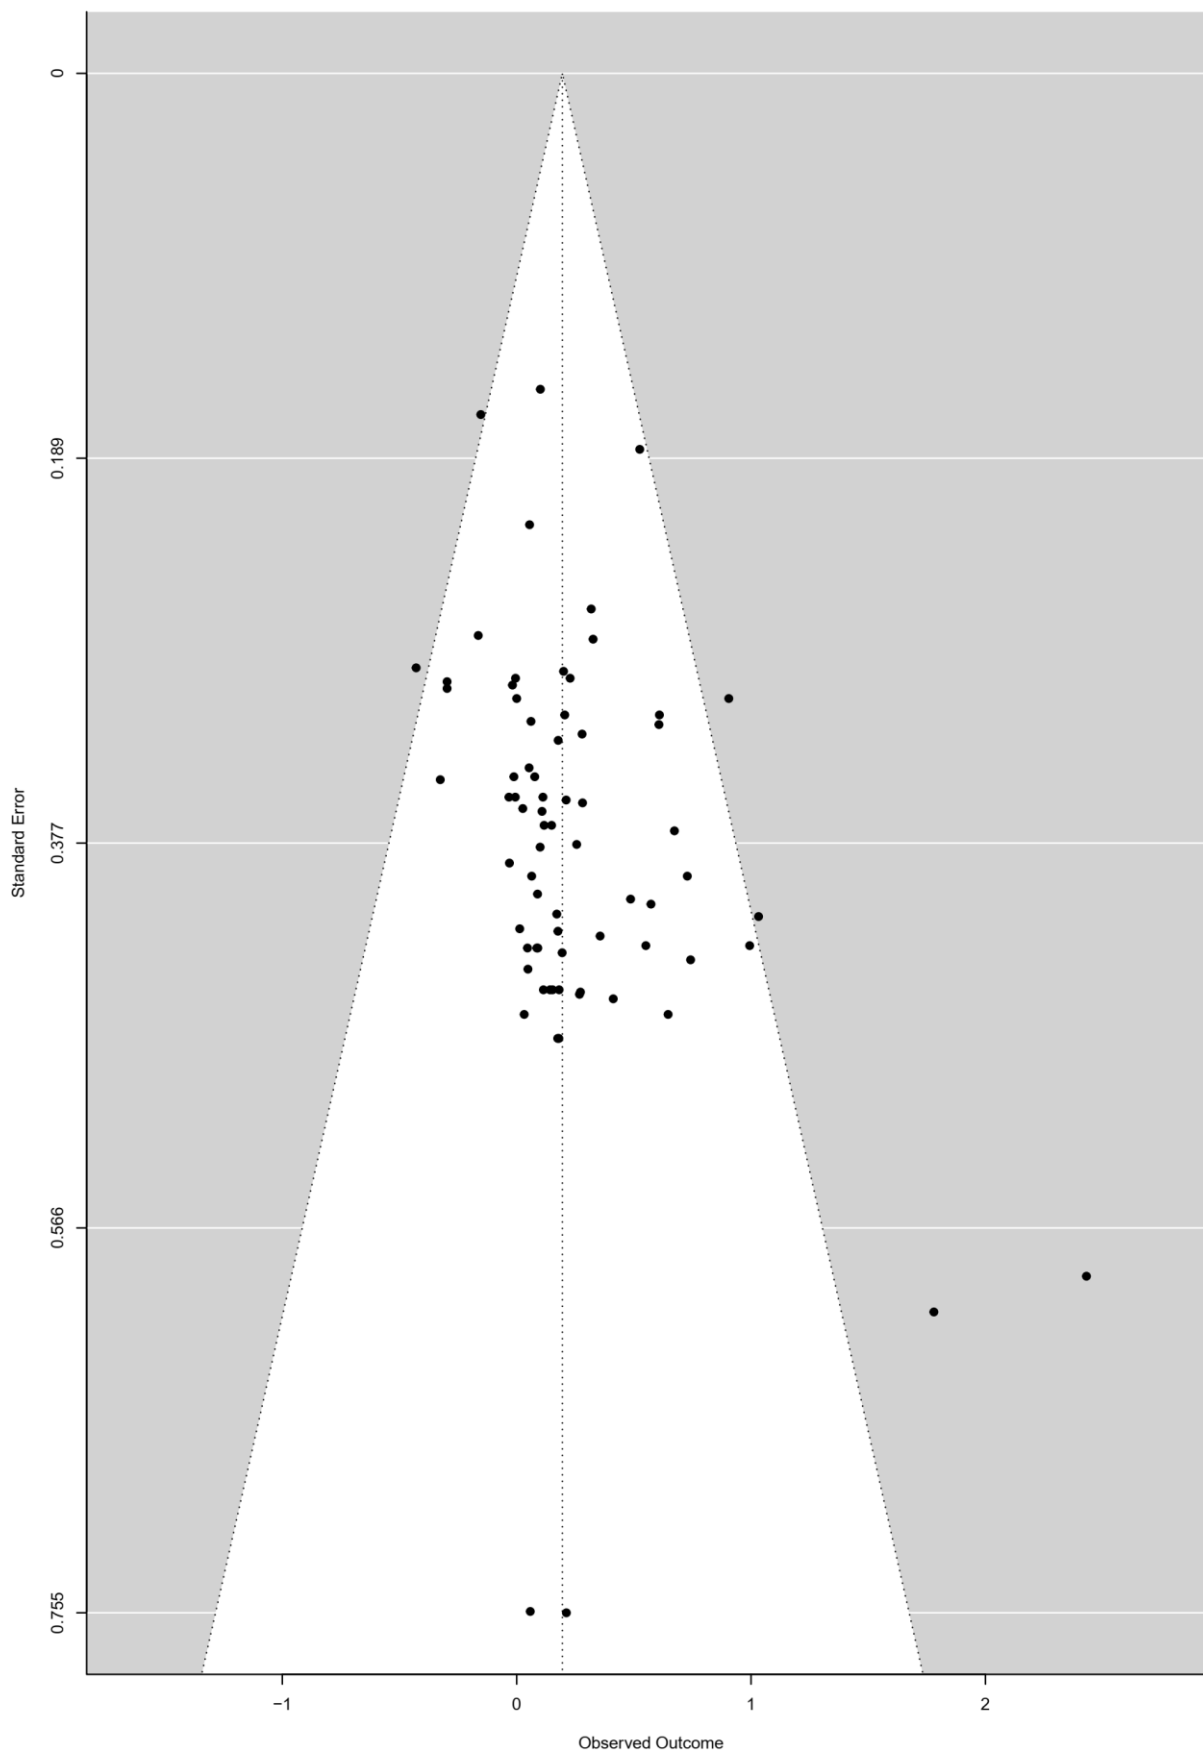

**Supplementary Figure 22** – Funnel plot showing results studies testing the effects of ingesting additional protein on adults' lean body or muscle mass only in studies including a resistance exercise program reporting protein ingestion.

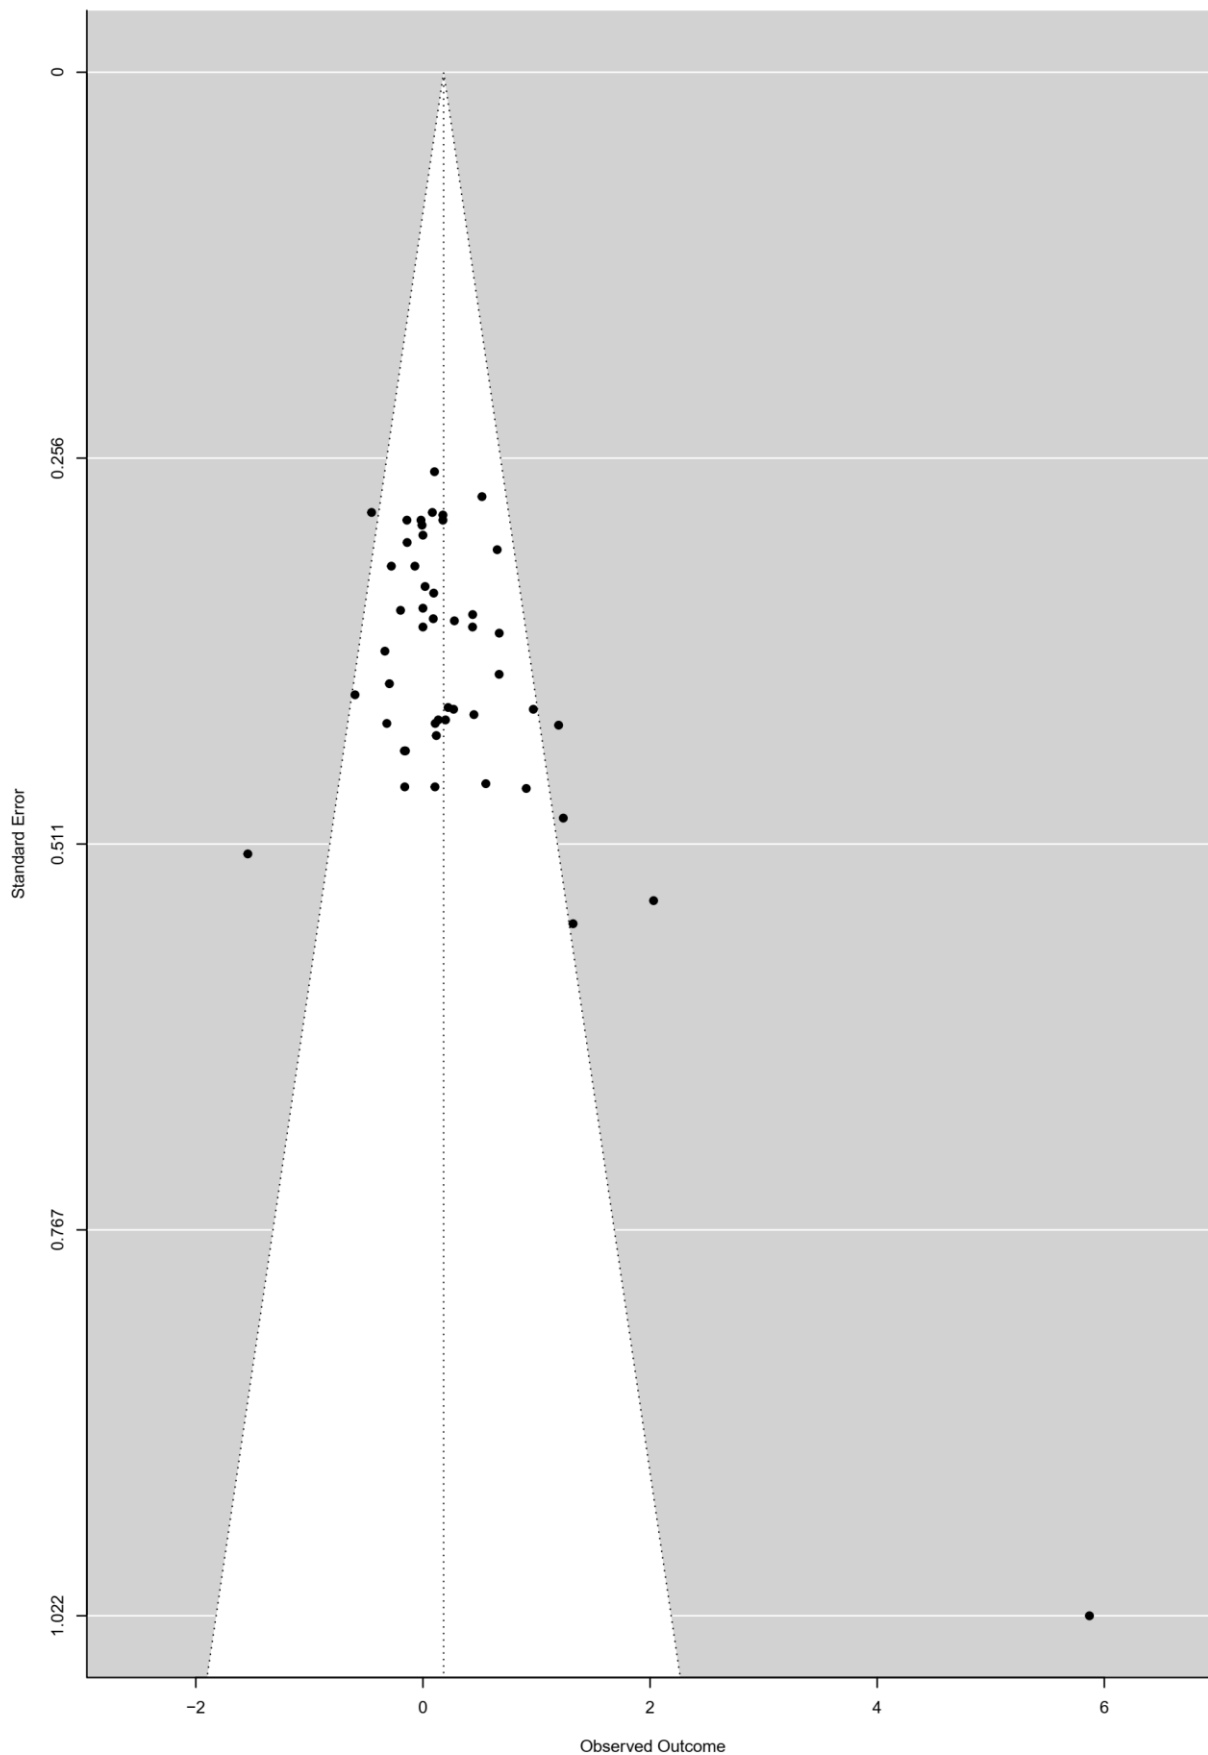

**Supplementary Figure 23** – Funnel plot showing results studies testing the effects of ingesting additional protein on adults' bench press strength in studies including or not a resistance exercise program.

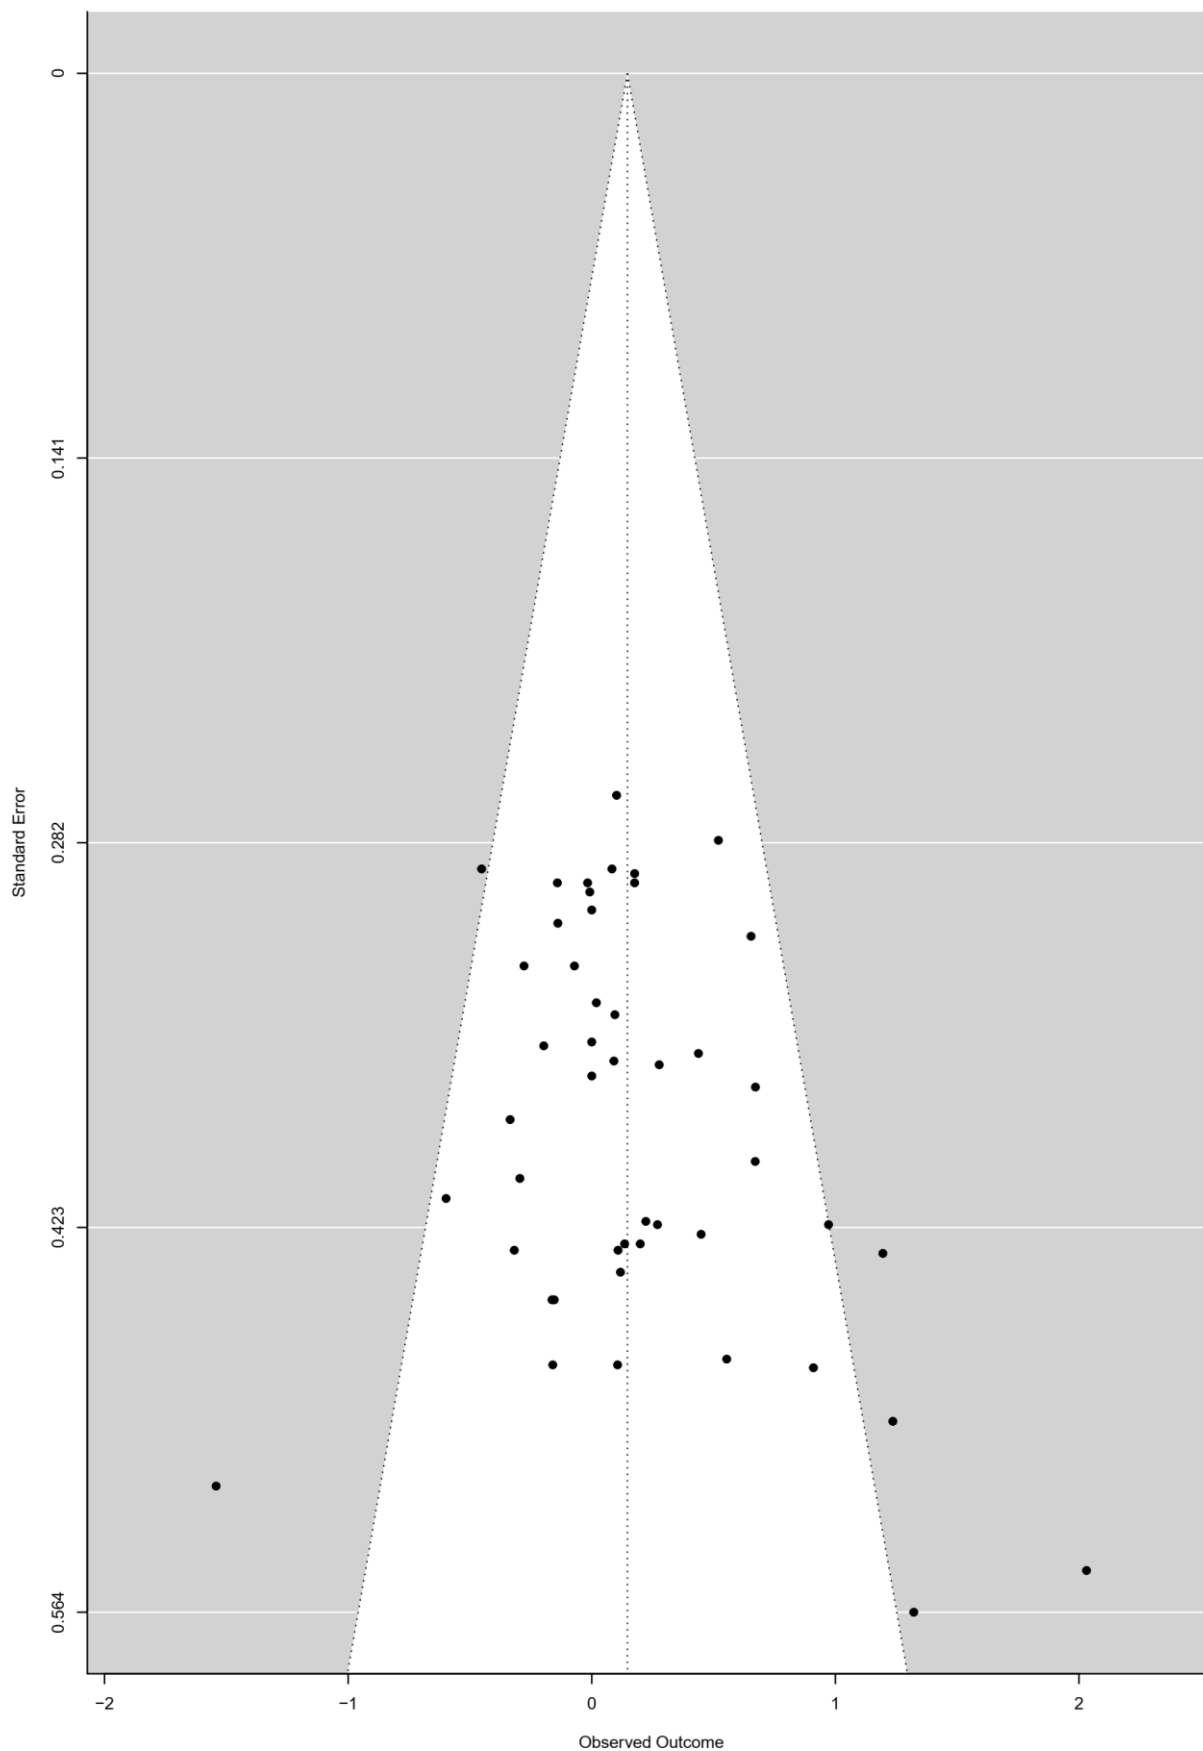

**Supplementary Figure 24** – Funnel plot showing results studies testing the effects of ingesting additional protein on adults' bench press strength only in studies including a resistance exercise program reporting protein ingestion.

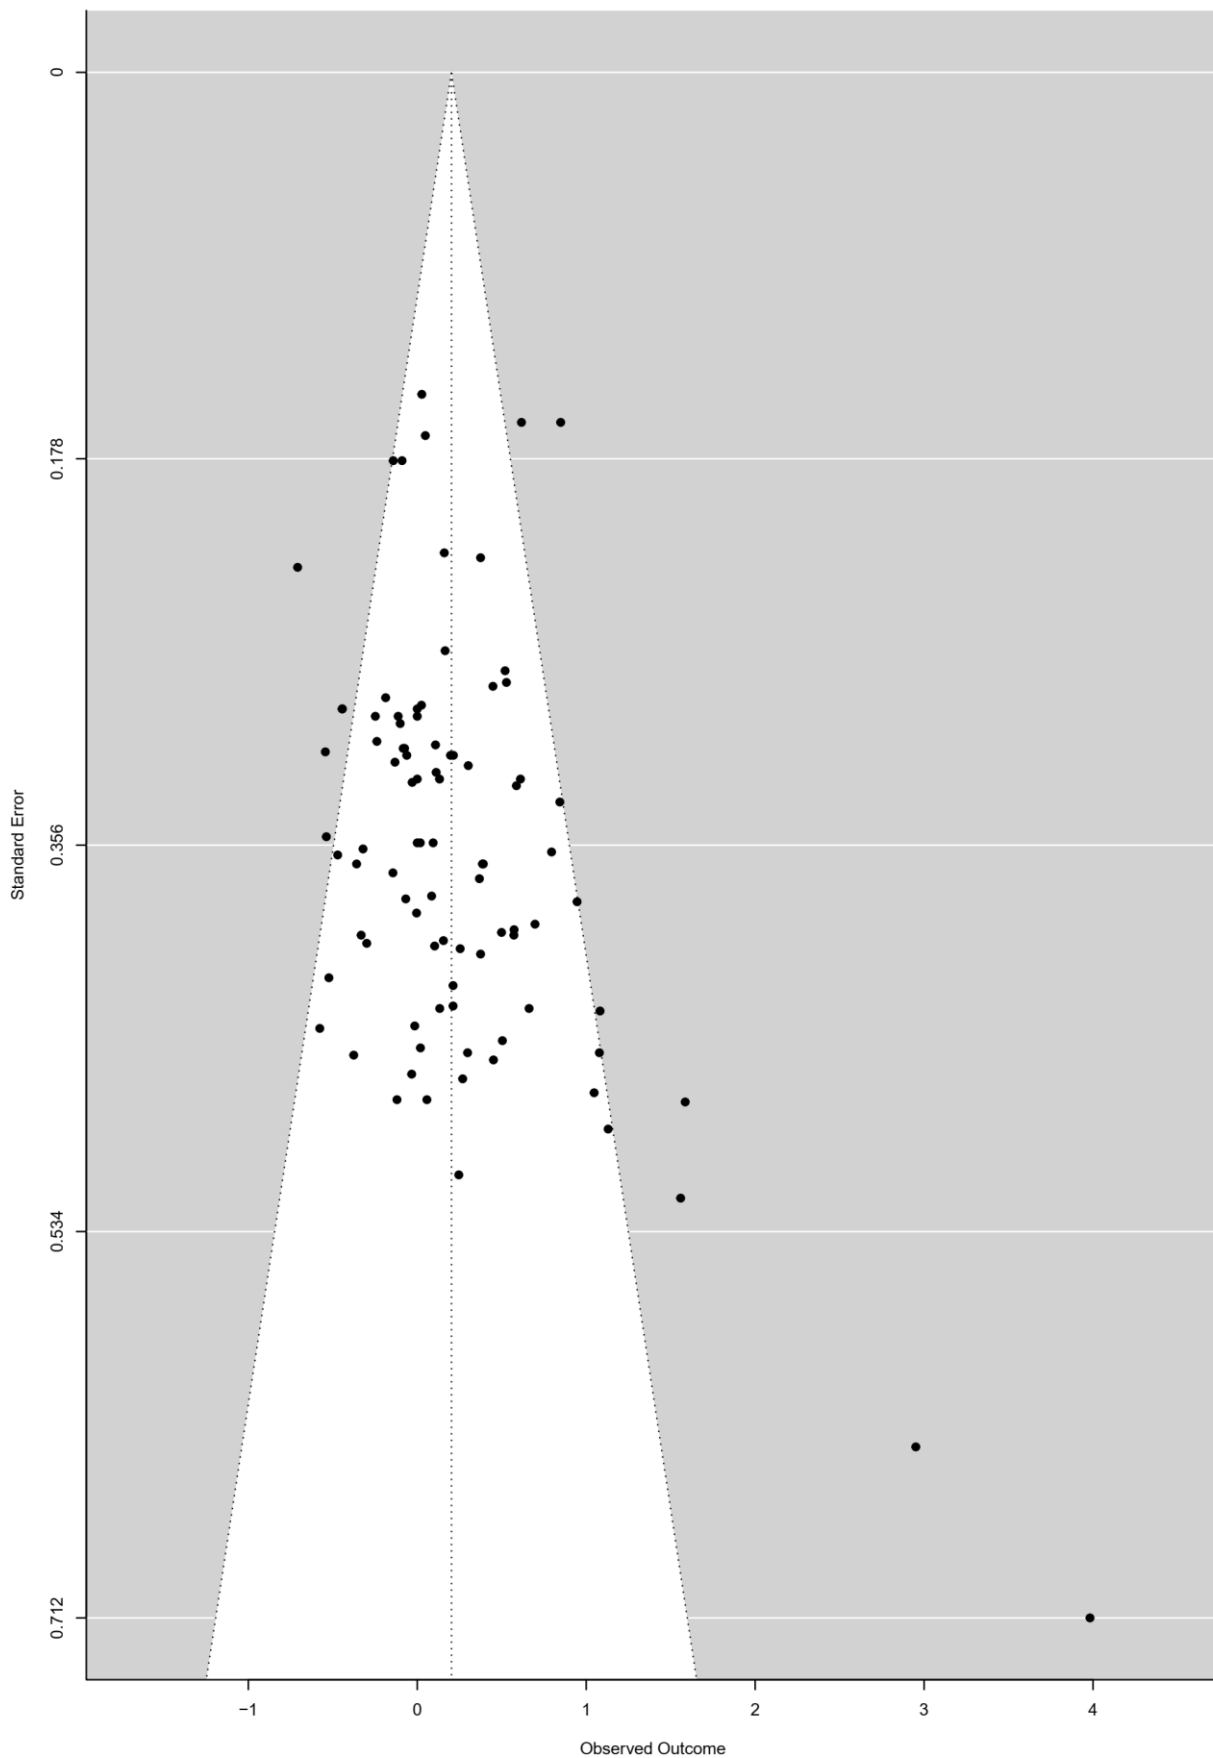

**Supplementary Figure 25** – Funnel plot showing results studies testing the effects of ingesting additional protein on adults' lower-body strength in studies including or not a resistance exercise program.

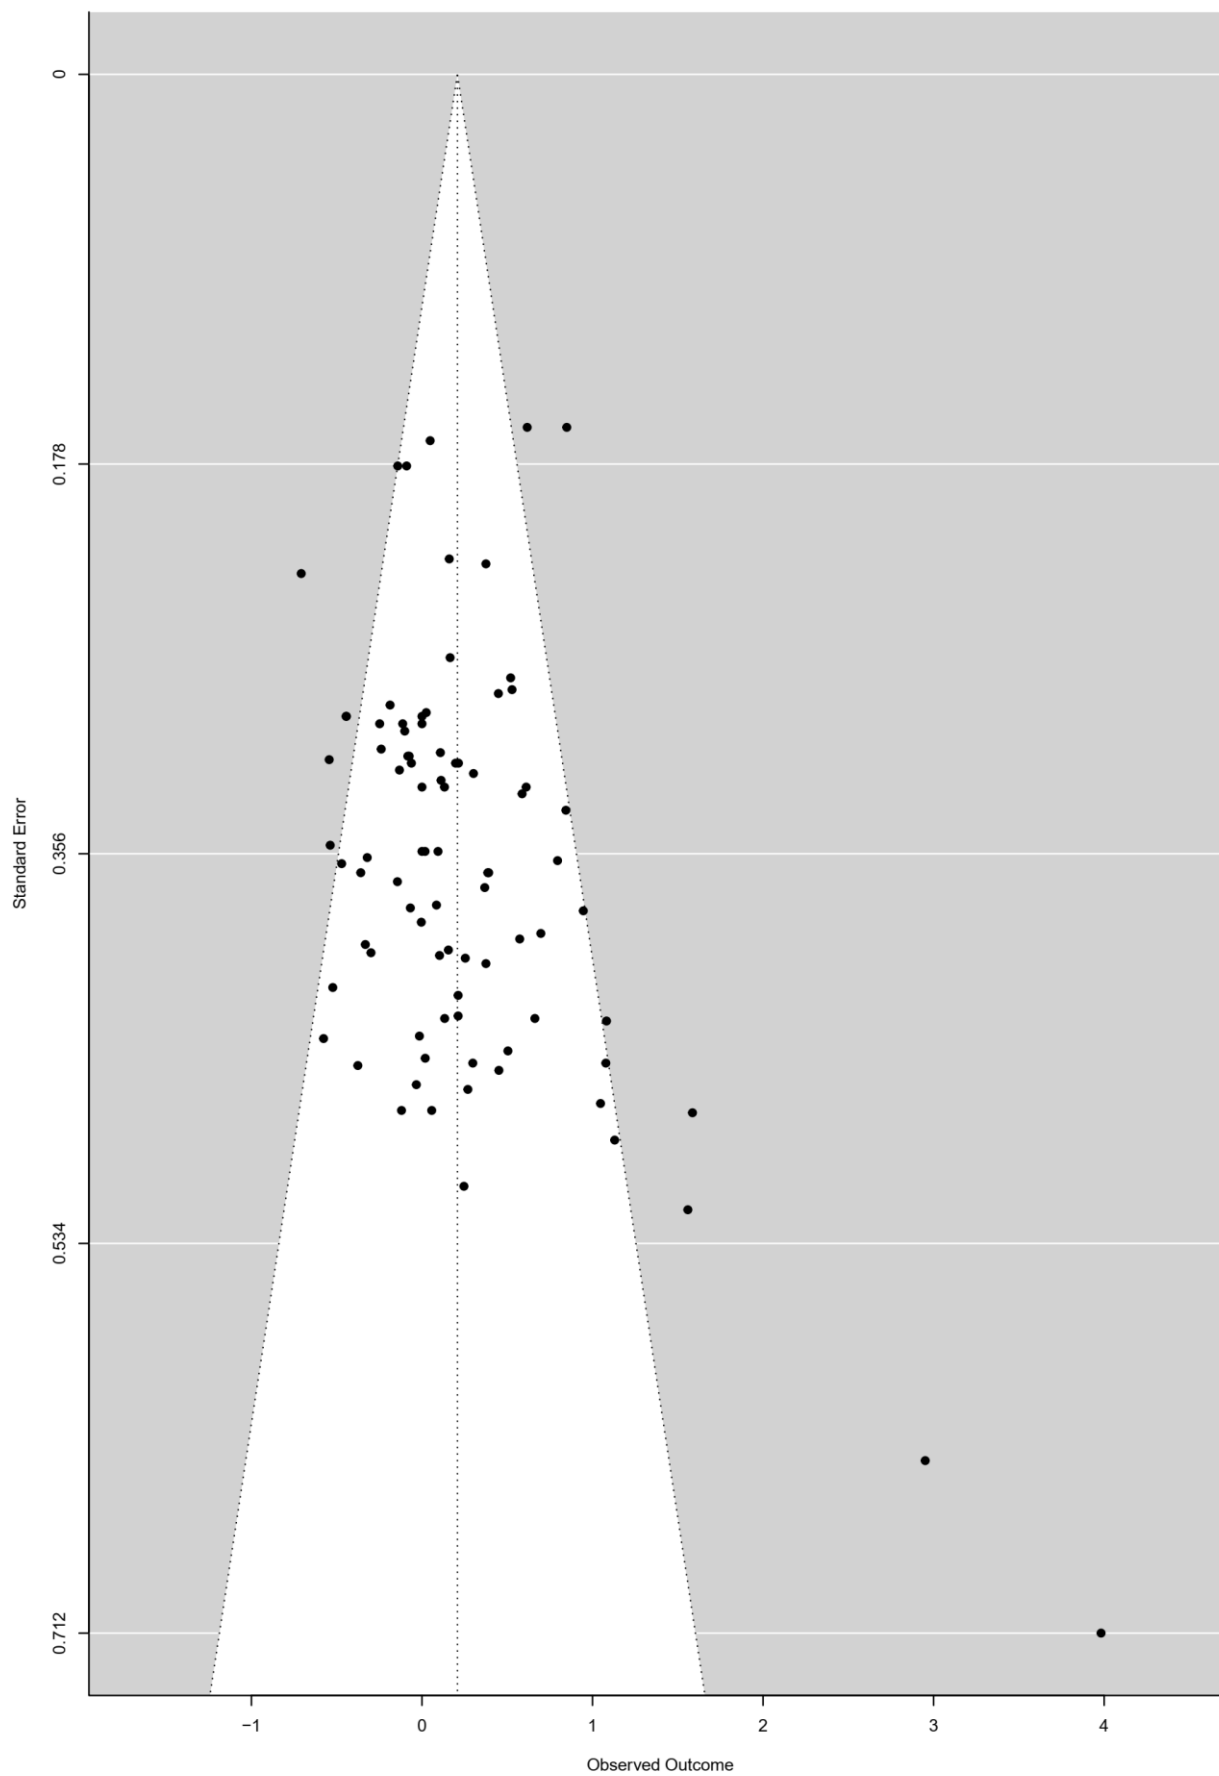

**Supplementary Figure 26** – Funnel plot showing results studies testing the effects of ingesting additional protein on adults' lower-body strength only in studies including a resistance exercise program.

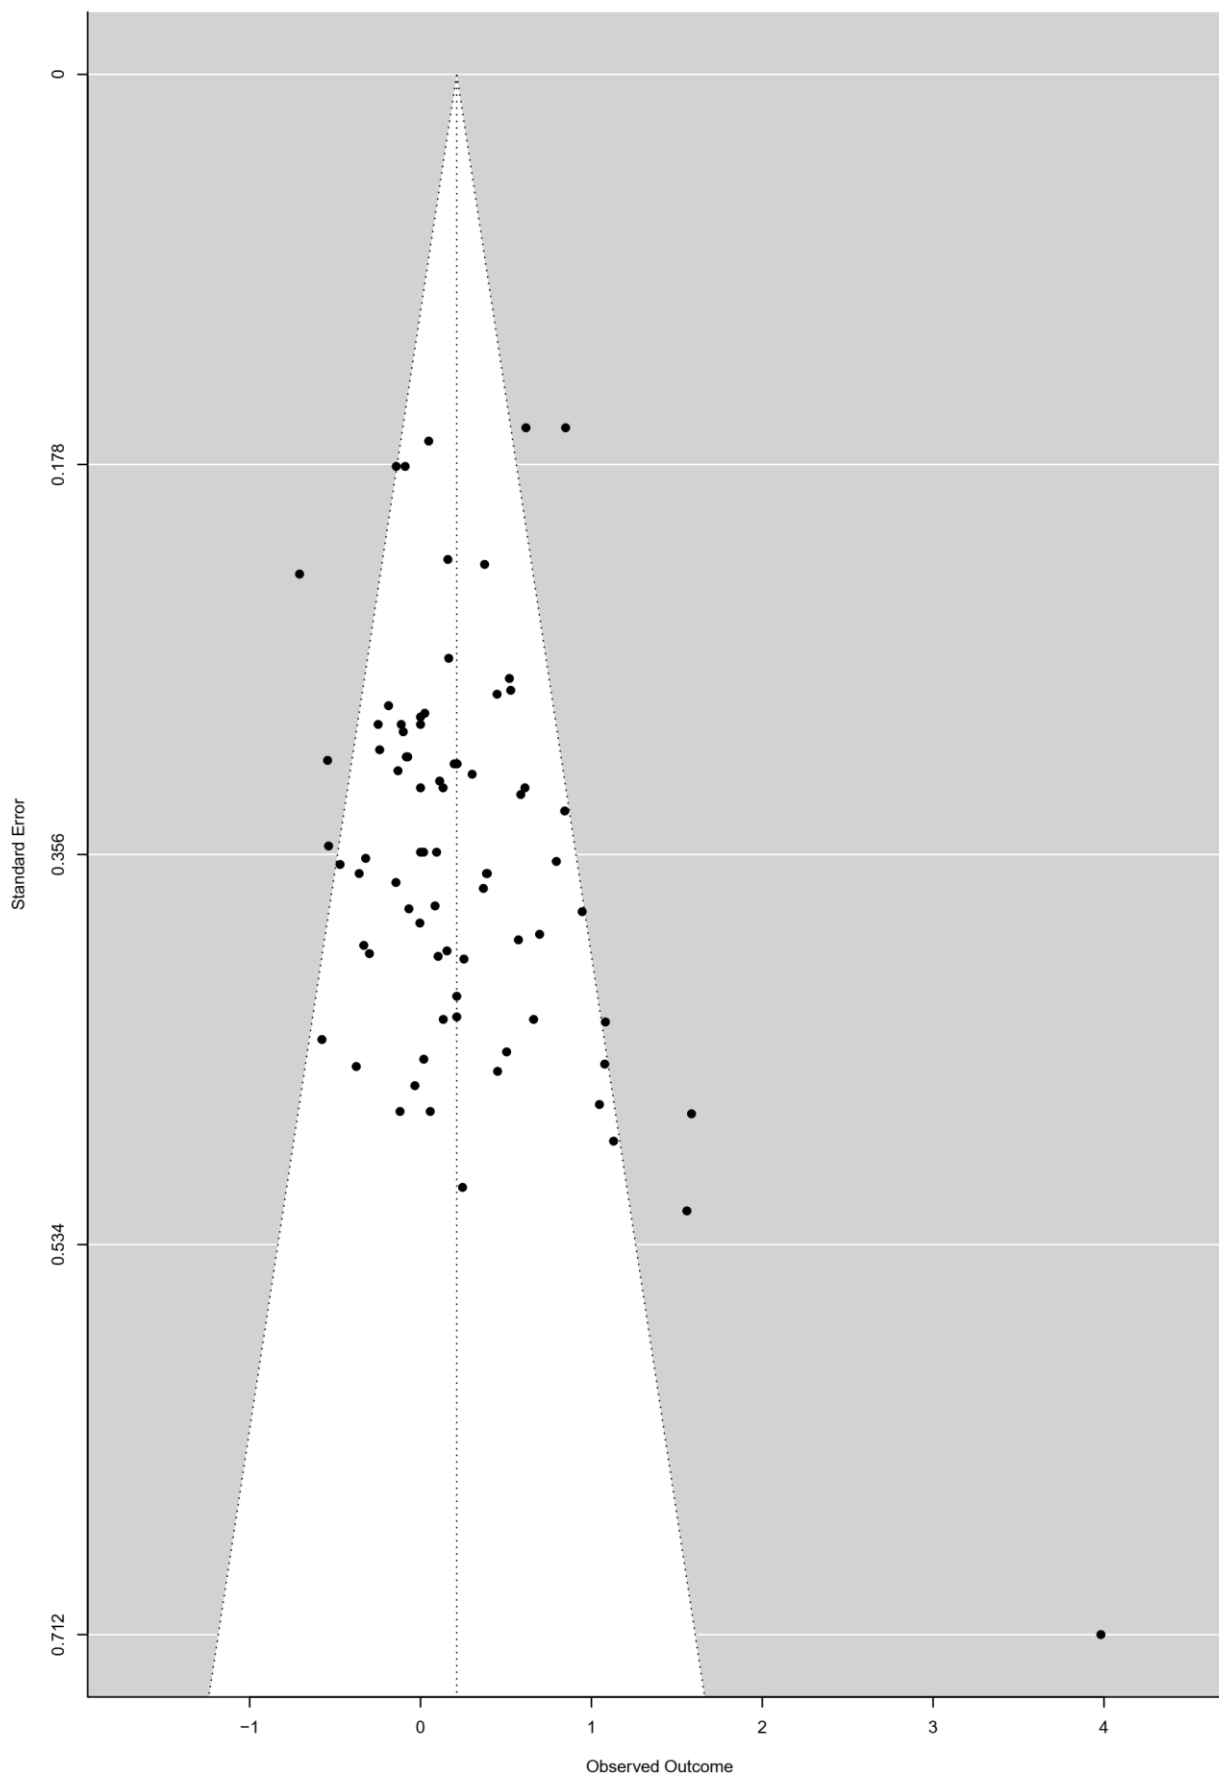

**Supplementary Figure 27** – Funnel plot showing results studies testing the effects of ingesting additional protein on adults' lower-body strength only in studies including a resistance exercise program reporting protein ingestion.



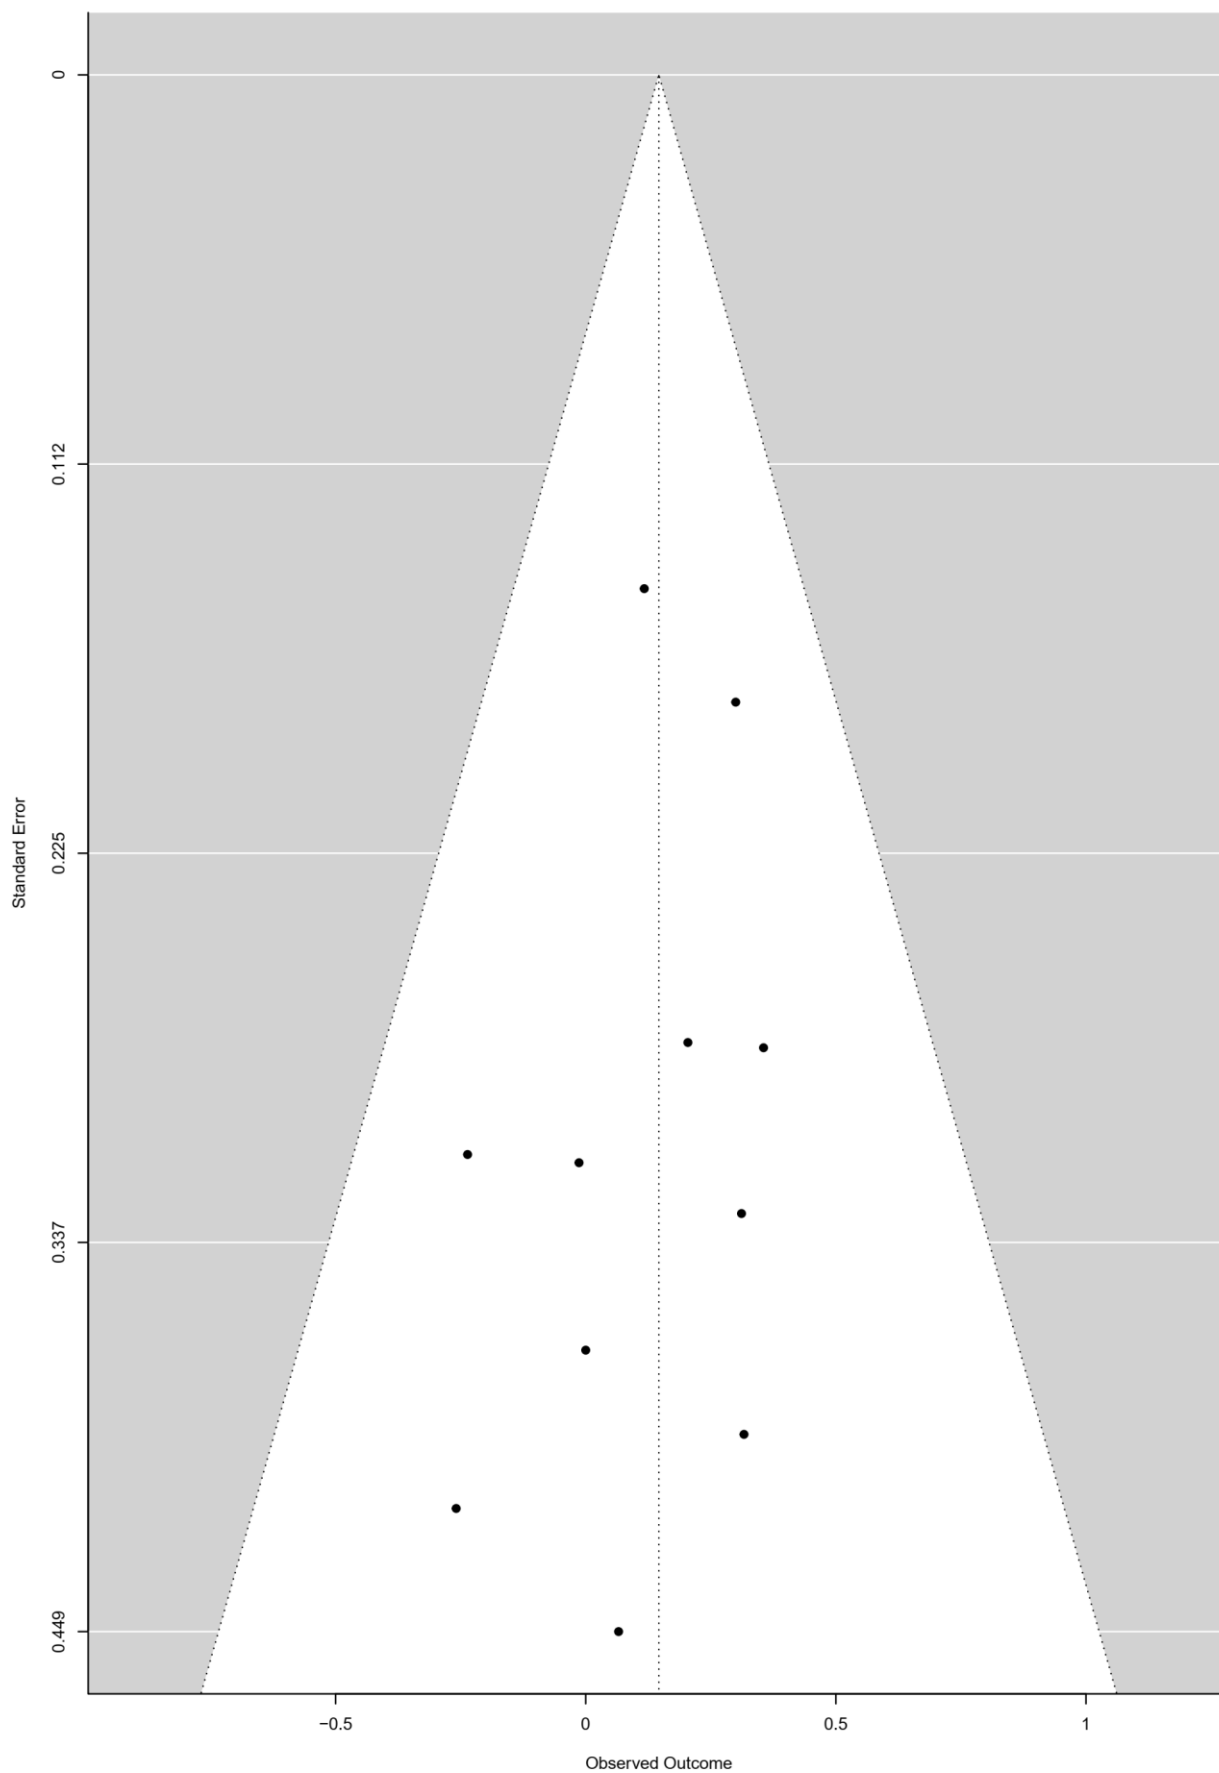

**Supplementary Figure 28** – Funnel plot showing results studies testing the effects of ingesting additional protein on adults' handgrip strength in studies including or not a resistance exercise program.

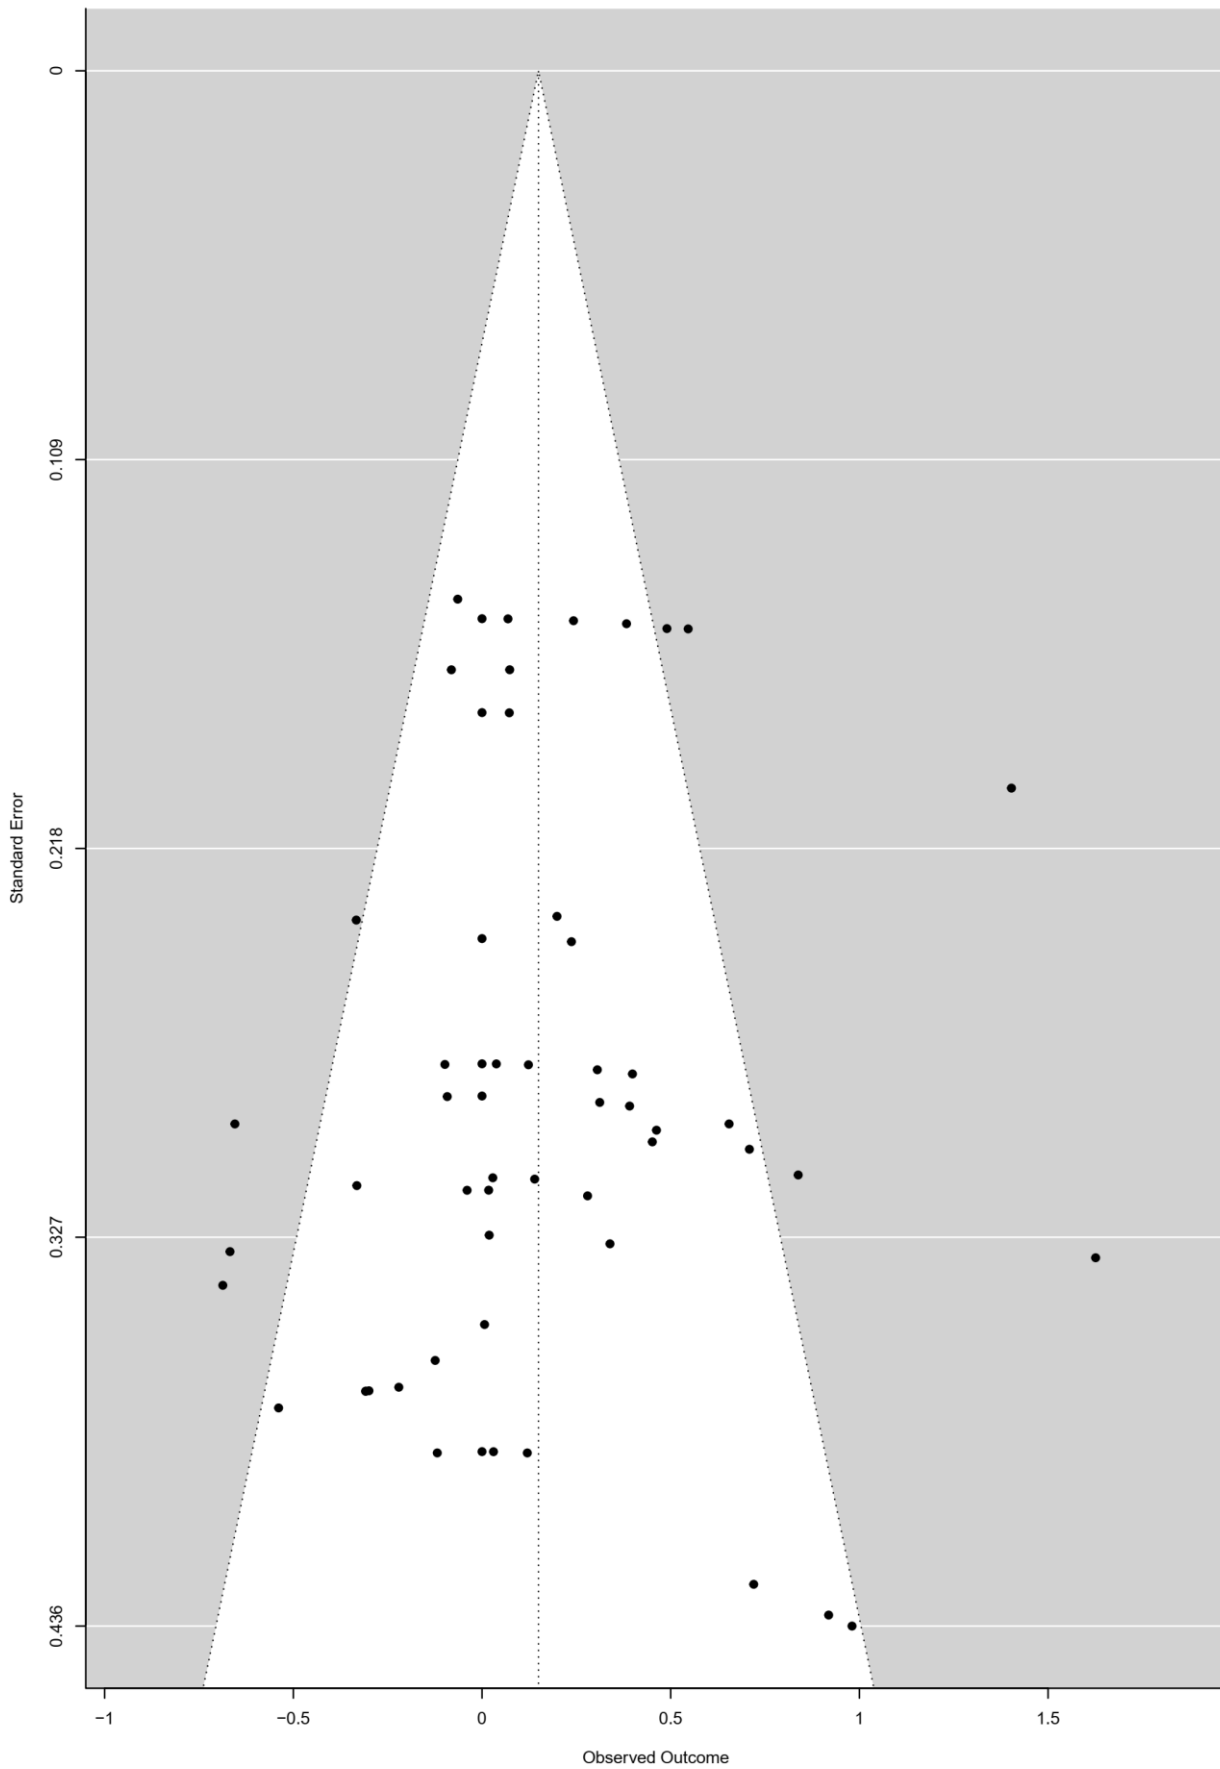

**Supplementary Figure 29** – Funnel plot showing results studies testing the effects of ingesting additional protein on adults' performance in physical and functional tests in studies including or not a resistance exercise program.
