# Supplementary material for: Systematic review and meta‐analysis of protein intake to support muscle mass and function in healthy adults
Source: PubMed Central journal article supplement — J Cachexia Sarcopenia Muscle. 2022 Feb 20;13(2):795–810. doi: 10.1002/jcsm.12922 (PMC8978023; doi:10.1002/jcsm.12922), 2022-02-20
Supplement: JCSM-13-795-s003.pdf [file JCSM-13-795-s003.pdf]

# **Systematic review and meta-analysis of protein intake to support muscle mass and function in healthy adults**

Everson A Nunes<sup>1,2</sup>, Lauren Colenso-Semple<sup>1</sup>, Sean R McKellar<sup>1</sup>, Thomas Yau<sup>1</sup>, Muhammad Usman Ali<sup>3</sup>, Donna Fitzpatrick-Lewis<sup>3</sup>, Diana Sherifali<sup>4</sup>, Claire Gaudichon<sup>5</sup>, Daniel Tomé<sup>5</sup>, Philip J Atherton<sup>6</sup>, Maria Camprubi Robles<sup>7</sup>, Sandra Naranjo-Modad<sup>8</sup>, Michelle Braun<sup>9</sup>, Francesco Landi<sup>10</sup> and Stuart M Phillips<sup>1\*</sup>

<sup>1</sup> Exercise Metabolism Research Group, Department of Kinesiology, McMaster University, Hamilton, L8S 4L8, ON, Canada.

<sup>2</sup>Laboratory of Investigation of Chronic Diseases, Department of Physiological Sciences, Federal University of Santa Catarina, Florianópolis, 88040-900, SC, Brazil.

<sup>3</sup>McMaster Evidence Review and Synthesis Centre, McMaster University, Hamilton, L8S 4L8, ON, Canada.

<sup>4</sup>School of Nursing, Faculty of Health Sciences, McMaster University, Hamilton, L8S 4L8, ON, Canada.

<sup>5</sup>Université Paris-Saclay, AgroParisTech, INRAE, UMR PNCA, 75005 Paris, France

<sup>6</sup>MRC Versus Arthritis Centre of Excellence for Musculoskeletal Ageing Research (CMAR), NIHR Biomedical Research Centre, School of Medicine, University of Nottingham, Nottingham, NG7 2RD, England.

<sup>7</sup>Abbott Nutrition, Research and Development, Granada, Spain

<sup>8</sup>Givaudan, Research and Development, Avignon, France

<sup>9</sup>International Flavors & Fragrances, Research and Development, St. Louis, MO, USA

<sup>10</sup>Geriatric Internal Medicine Unit of the Geriatrics Department of the A. Gemelli University Hospital, Rome, IT

\* Corresponding author: S. M. Phillips, [phillis@mcmaster.ca](mailto:phillis@mcmaster.ca) and [publications@ilsieurope.be](mailto:publications@ilsieurope.be); Tel.: +1-905-525-9140 (ext. 24465). Mailing address: Department of Kinesiology, Ivor Wynne Centre, McMaster University, 1280 Main St. West, Hamilton, ON L8S 4L8.

## Systematic search – Search strategies

### Protein intervention

**Database:** Web Of Science - Medline <1950 to September, 2020>

Search performed: August 1st, 2021. (4338 citations)

- #6 #4 and #5
- #5 ((muscle or muscular or lean or fat-free) NEAR mass))
- # 4 #3 OR #2 OR #1
- # 3 (protein\* NEAR ingest\*)
- # 2 (protein\* NEAR (diet\* or supplement\* or intake\* or consum\*)) )
- # 1 dietary proteins/

### Protein intervention and Resistance Exercise

**Database:** Web Of Science - Medline <1950 to Present>

Search performed: September 23, 2020. (3682 citations)

- # 13 (#12) AND LANGUAGE: (English)
- # 12 #11 AND #4
- # 11 #10 OR #9 OR #8 OR #7 OR #6 OR #5
- # 10 ((muscle\* or muscular) NEAR strength\*)
- # 9 muscle strength/
- # 8 (exercise\* NEAR (weight\* OR isometric OR resistance OR endurance OR train\*)) )
- # 7 Isometric Contraction/
- # 6 Weight Lifting/
- # 5 Resistance training/
- # 4 #3 OR #2 OR #1
- # 3 (protein\* NEAR ingest\*)
- # 2 (protein\* NEAR (diet\* or supplement\* or intake\* or consum\*)) )
- # 1 dietary proteins/

**Protein intervention**

**Database:** Embase <1974 to September, 2020> (3469 citations)

1. protein intake/
2. (protein\* adj3 (diet\* or supplement\* or intake\* or consum\* or ingest\*)).ti,ab,kw.
3. 1 or 2
4. ((muscle or muscular or lean or fat-free) adj3 mass\*).ti,ab,kw.
5. exp animal/
6. human/
7. 3 and 4
8. 7 not (5 not (5 and 6))

**Protein intervention and Resistance Exercise**

**Database:** Embase <1974 to 2020 September 23> (1986 citations)

1. protein intake/
2. (protein\* adj3 (diet\* or supplement\* or intake\* or consum\* or ingest\*)).ti,ab,kw.
3. 1 or 2
4. resistance training/
5. weight lifting/
6. ((weight or isometric or strength or endurance or resistance) adj3 (train\* or lift\* or exercise\*)).ti,ab,kw.
7. muscle strength/
8. ((muscle\* or muscular) adj3 strength\*).ti,ab,kw.
9. or/4-8
10. 3 and 9
11. exp animal/
12. human/
13. 10 not (11 not (11 and 12))
14. remove duplicates from 13
15. (cancer or sarcopenia or bed-rest).ti.
16. 14 not 15

**Protein intervention****Database:** Web of Science Core Collection <1976 to 2020 September> (4460 citations)

- #6 #4 and #5 4460
- # 5 ((muscle or muscular or lean or fat-free) NEAR mass))
- # 4 #3 OR #2 OR #1
- # 3 (protein\* NEAR ingest\*)
- # 2 (protein\* NEAR (diet\* or supplement\* or intake\* or consum\* ) )
- # 1 dietary proteins/

**Protein intervention and Resistance Exercise****Database:** Web of Science Core Collection <1976 to 2020 September 22> (2576 citations)

- # 12 (#11 AND #4) AND LANGUAGE: (English)
- # 11 #10 OR #9 OR #8 OR #7 OR #6 OR #5
- # 10 ((muscle\* or muscular) NEAR strength\*)
- # 9 muscle strength/
- # 8 (exercise\* NEAR (weight\* OR isometric OR resistance OR endurance OR train\* ) )
- # 7 Isometric Contraction/
- # 6 Weight Lifting/
- # 5 Resistance training/
- # 4 #3 OR #2 OR #1
- # 3 (protein\* NEAR ingest\*)
- # 2 (protein\* NEAR (diet\* or supplement\* or intake\* or consum\* ) )
- # 1 dietary proteins/

**Protein intervention**

**Database:** CINAHL <1974 to 2020 September> (1560 citations)

- S6 S4 and S5
- S5 (muscle\* or muscular or lean or fat-free) N3 mass
- S4 S1 OR S2 OR S3
- S3 protein N3 (intake\* or ingest\* or supplement\* or diet\* or consum)
- S2 MH Dietary Proteins+
- S1 MH Diet, High Protein

**Protein intervention and Resistance Exercise**

**Database:** CINAHL <1974 to 2020 September 22> (1686 citations)

- S15 s12 NOT s13 Limiters - English Language
- S14 s12 NOT s13
- S13 (MH "Animals+") NOT ((MH "Human") AND (MH "Animals+"))
- S12 S4 AND S11
- S11 S5 OR S6 OR S7 OR S8 OR S9 OR S10
- S10 (muscle\* or muscular) N3 strength\*
- S9 MH Muscle Strength+
- S8 (weight\* or isometric\* or strength\* or resistance or endurance or high intensity) N3 (train\* or lift\* or exercise\*)
- S7 MH Weight Lifting
- S6 MH Muscle Strengthening+
- S5 MH "Resistance Training"
- S4 S1 OR S2 OR S3
- S3 protein N3 (intake\* or ingest\* or supplement\* or diet\* or consum)
- S2 MH "Dietary Proteins+"
- S1 MH "Diet, High Protein"
