# Supplementary material for: Systematic review and meta‐analysis of protein intake to support muscle mass and function in healthy adults
Source: PubMed Central journal article supplement — J Cachexia Sarcopenia Muscle. 2022 Feb 20;13(2):795–810. doi: 10.1002/jcsm.12922 (PMC8978023; doi:10.1002/jcsm.12922), 2022-02-20
Supplement: JCSM-13-795-s004.pdf [file JCSM-13-795-s004.pdf]

## **Systematic review and meta-analysis of protein intake to support muscle mass and function in healthy adults**

Everson A Nunes<sup>1,2</sup>, Lauren Colenso-Semple<sup>1</sup>, Sean R McKellar<sup>1</sup>, Thomas Yau<sup>1</sup>, Muhammad Usman Ali<sup>3</sup>, Donna Fitzpatrick-Lewis<sup>3</sup>, Diana Sherifali<sup>4</sup>, Claire Gaudichon<sup>5</sup>, Daniel Tomé<sup>5</sup>, Philip J Atherton<sup>6</sup>, Maria Camprubi Robles<sup>7</sup>, Sandra Naranjo-Modad<sup>8</sup>, Michelle Braun<sup>9</sup>, Francesco Landi<sup>10</sup> and Stuart M Phillips<sup>1\*</sup>

<sup>1</sup> Exercise Metabolism Research Group, Department of Kinesiology, McMaster University, Hamilton, L8S 4L8, ON, Canada.

<sup>2</sup> Laboratory of Investigation of Chronic Diseases, Department of Physiological Sciences, Federal University of Santa Catarina, Florianópolis, 88040-900, SC, Brazil.

<sup>3</sup> McMaster Evidence Review and Synthesis Centre, McMaster University, Hamilton, L8S 4L8, ON, Canada.

<sup>4</sup> School of Nursing, Faculty of Health Sciences, McMaster University, Hamilton, L8S 4L8, ON, Canada.

<sup>5</sup> Université Paris-Saclay, AgroParisTech, INRAE, UMR PNCA, 75005 Paris, France

<sup>6</sup> MRC Versus Arthritis Centre of Excellence for Musculoskeletal Ageing Research (CMAR), NIHR Biomedical Research Centre, School of Medicine, University of Nottingham, Nottingham, NG7 2RD, England.

<sup>7</sup> Abbott Nutrition, Research and Development, Granada, Spain

<sup>8</sup> Givaudan, Research and Development, Avignon, France

<sup>9</sup> International Flavors & Fragrances, Research and Development, St. Louis, MO, USA

<sup>10</sup> Geriatric Internal Medicine Unit of the Geriatrics Department of the A. Gemelli University Hospital, Rome, IT

\* Corresponding author: S. M. Phillips, [phillis@mcmaster.ca](mailto:phillis@mcmaster.ca) and [publications@ilsieurope.be](mailto:publications@ilsieurope.be); Tel.: +1-905-525-9140 (ext. 24465).

Mailing address: Department of Kinesiology, Ivor Wynne Centre, McMaster University, 1280 Main St. West, Hamilton, ON L8S 4L8.

Supplementary table 1 – Characteristics of the studies

| Studies                           | Group (n) | Group Name   | Sex   | Age, y      | Duration, wk | Resistance Exercise (Yes/No) | Daily Protein Intake (g/kg/day) | Daily Protein Intake with Supplement (g/kg/day) | Protein Supplementation |                                                                   | Placebo         |             | Outcomes                                                   |
|-----------------------------------|-----------|--------------|-------|-------------|--------------|------------------------------|---------------------------------|-------------------------------------------------|-------------------------|-------------------------------------------------------------------|-----------------|-------------|------------------------------------------------------------|
|                                   |           |              |       |             |              |                              |                                 |                                                 | Type of Protein         | Amount, g/d                                                       | Type of Placebo | Amount, g/d |                                                            |
| Aas, S. N., et al., 2020[1]       | Prot (11) | ST           | Mixed | 86.6 ± 6.0  | 10           | YES                          | 0.91 ± 0.1                      | 1.21                                            | Milk protein            | 34                                                                | ----            | ----        | Muscle Strength<br>Physical Function                       |
|                                   | Con (10)  | CON          | Mixed | 82.6 ± 4.5  | 10           | YES                          | 0.83 ± 0.29                     | ----                                            | N/A                     | N/A                                                               | NP              | N/A         |                                                            |
| Aleman-Mateo, H., et al., 2014[2] | Prot (49) | IG/HD+RCH    | Mixed | 70.8 ± 7.6  | 12           | NO                           | 0.9                             | 1.2                                             | Ricotta cheese          | 18.12                                                             | ----            | ----        | Body Composition<br>Handgrip strength<br>Physical Function |
|                                   | Con (49)  | CG/HD        | Mixed | 69.6 ± 6.4  | 12           | NO                           | 0.9                             | ----                                            | N/A                     | N/A                                                               | NP              | N/A         |                                                            |
| Amasene, M., et al., 2019[3]      | Prot (13) | Protein      | Mixed | 82.9 ± 5.59 | 12           | YES                          | ----                            | ----                                            | Whey protein            | 20 + 3g leucine                                                   | ----            | ----        | Body Composition<br>Handgrip strength<br>Physical Function |
|                                   | Con (13)  | Placebo      | Mixed | 81.7 ± 6.45 | 12           | YES                          | ----                            | ----                                            | N/A                     | N/A                                                               | Maltodextrin    | Isocaloric  |                                                            |
| Antonio, J., et al., 2014[4]      | Prot (20) | High Protein | Mixed | 25.2 ± 6.3  | 8            | YES                          | 2.3 ± 1                         | 4.4 ± 0.8                                       | Whey and casein protein | Amount to reach 4.4 g/kg/day when added to normal dietary protein | ----            | ----        | Body Composition<br>Muscle Strength                        |
|                                   | Con (10)  | Control      | Mixed | 22.0 ± 2.6  | 8            | YES                          | 1.8 ± 0.4                       | ----                                            | N/A                     | N/A                                                               | NP              | N/A         |                                                            |

|                                            |             |                         |       |              |    |     |             |             |                              |                                 |                       |            |                                       |
|--------------------------------------------|-------------|-------------------------|-------|--------------|----|-----|-------------|-------------|------------------------------|---------------------------------|-----------------------|------------|---------------------------------------|
| <b>Antonio, J., et al., 2015[5]</b>        | Prot 1 (31) | HP                      | Mixed | 22.9 ± 3.1 y | 8  | YES | 2.1 ± 0.7   | 3.4 ± 0.6   | Whole food or protein powder | instructed to consume ≥ 3g/kg/d | ----                  | ----       | Body Composition<br>Muscle Strength   |
|                                            | Con (17)    | NP                      | Mixed | 24.8 ± 6.9   | 8  | YES | 2.3 ± 0.6   | ----        | N/A                          | N/A                             | NP                    | N/A        |                                       |
| <b>Aristizabal, J. C., et al., 2015[6]</b> | Prot 1 (18) | Whey                    | Mixed | 22.8 ± 3.7   | 36 | YES | 1           | 1.3         | Whey                         | 21.6                            | ----                  | ----       | Body Composition                      |
|                                            | Prot 2 (21) | Soy                     | Mixed | 24.0 ± 2.9   | 36 | YES | 1           | 1.3         | Soy                          | 20                              | ----                  | ----       |                                       |
|                                            | Con (22)    | Carb                    | Mixed | 22.3 ± 3.1   | 36 | YES | 1           | ----        | N/A                          | N/A                             | Maltodextrin          | 45.2       |                                       |
| <b>Arnarson, A., et al., 2013[7]</b>       | Prot (83)   | Whey                    | Mixed | 73.3 ± 6.0   | 12 | YES | 1.00 ± 0.2  | 1.06 ± 0.23 | Whey                         | 20                              | ----                  | ----       | Body Composition<br>Muscle Strength   |
|                                            | Con (78)    | Carbohydrates           | Mixed | 74.6 ± 5.8   | 12 | YES | 0.89 ± 0.23 | ----        | N/A                          | N/A                             | Carbohydrate          | 40         |                                       |
| <b>Babault, N., et al., 2014[8]</b>        | Prot 1 (22) | Soluble Milk protein    | Men   | 22.5 ± 4.1   | 10 | YES | ----        | ----        | Soluble Milk protein         | 24.29                           | ----                  | ----       | Muscle Strength                       |
|                                            | Prot 2 (22) | Micellar Casein protein | Men   | 22.2 ± 3.9   | 10 | YES | ----        | ----        | Micellar Casein protein      | 24.29                           | ----                  | ----       |                                       |
|                                            | Con (24)    | Placebo                 | Men   | 22.0 ± 3.9   | 10 | YES | ----        | ----        | N/A                          | N/A                             | Sucrose, Maltodextrin | 10.5, 19.5 |                                       |
| <b>Bartholomae, E., et al., 2019[9]</b>    | Prot (11)   | PRO                     | Mixed | 31.2         | 8  | NO  | 0.756       | 1.03        | Mung Bean protein            | 18                              | ----                  | ----       | Body Composition<br>Handgrip strength |
|                                            | Con (14)    | CON                     | Mixed | 31.2         | 8  | NO  | 0.8167      | ----        | N/A                          | N/A                             | Control Biscuit       | ----       |                                       |

|                                          |            |          |       |              |    |     |           |           |              |           |                                                                                       |           |                                     |
|------------------------------------------|------------|----------|-------|--------------|----|-----|-----------|-----------|--------------|-----------|---------------------------------------------------------------------------------------|-----------|-------------------------------------|
| <b>Bridge, A., et al., 2019[10]</b>      | Prot (15)  | GY       | Men   | 20.6 ± 2.2   | 12 | YES | ----      | 1.74      | Greek Yogurt | 48.5714   | ----                                                                                  | ----      | Body Composition<br>Muscle Strength |
|                                          | Con (15)   | PP       | Men   | 20.6 ± 2.2   | 12 | YES | 1.22      | ----      | N/A          | N/A       | Placebo<br>Pudding (2 parts maltodextrin, 1 part chocolate pudding powder, and water) | 114.14    |                                     |
| <b>Brown, E. C., et al., 2004[11]</b>    | Prot 1 (9) | Soy      | Men   | 21.67 ± 0.24 | 9  | YES | ----      | ----      | Soy          | 33        | ----                                                                                  | ----      | Body Composition                    |
|                                          | Prot 2 (9) | Whey     | Men   | 20.36 ± 0.34 | 9  | YES | ----      | ----      | Whey         | 33        | ----                                                                                  | ----      |                                     |
|                                          | Con (9)    | Control  | Men   | 20.44 ± 0.63 | 9  | YES | ----      | ----      | N/A          | N/A       | NP                                                                                    | N/A       |                                     |
| <b>Burke, D. G., et al., 2001[12]</b>    | Prot (10)  | Whey     | Men   | 25           | 6  | YES | 2.1 ± 0.3 | 3.3       | Whey         | 1.2g/kg/d | ----                                                                                  | ----      | Body Composition<br>Muscle Strength |
|                                          | Con (5)    | Placebo  | Men   | 25           | 6  | YES | 1.2 ± 0.2 | ----      | N/A          | N/A       | Maltodextrin                                                                          | 1.2g/kg/d |                                     |
| <b>Campbell, B. I., et al., 2018[13]</b> | Prot (8)   | High PRO | Women | 21.2 ± 2.1   | 8  | YES | 1.5 ± 0.5 | 2.5 ± 0.2 | Whey         | 50        | ----                                                                                  | ----      | Muscle Strength                     |
|                                          | Con (9)    | Low PRO  | Women | 21.2 ± 2.1   | 8  | YES | 1.5 ± 0.5 | 0.9 ± 0.1 | Whey         | 10        | ----                                                                                  | ----      |                                     |
| <b>Candow, D. G., et al., 2006a[14]</b>  | Prot 1 (9) | W        | Mixed | 23.16        | 6  | YES | 1.6 ± 1.3 | 2.95      | Whey         | 83.16     | ----                                                                                  | ----      | Body Composition<br>Muscle Strength |
|                                          | Prot 2 (9) | S        | Mixed | 23.16        | 6  | YES | 1.8 ± 1.6 | 3         | Soy          | 86.16     | ----                                                                                  | ----      |                                     |

|                                             |                |         |       |                 |    |     |           |      |                                                                                                                                                                    |       |                                               |                 |                                        |
|---------------------------------------------|----------------|---------|-------|-----------------|----|-----|-----------|------|--------------------------------------------------------------------------------------------------------------------------------------------------------------------|-------|-----------------------------------------------|-----------------|----------------------------------------|
|                                             | Con (9)        | P       | Mixed | 23.16           | 6  | YES | 1.7 ± 1.5 | ---- | N/A                                                                                                                                                                | N/A   | maltodextrin,<br>sucrose<br>powder            | 83.16,<br>20.79 |                                        |
| <b>Candow, D. G.,<br/>et al., 2006b[15]</b> | Prot 1<br>(9)  | PRO-A   | Men   | 63.3 ± 3.3      | 12 | YES | 1.4       | 1.56 | whey protein<br>concentrate<br>and whey<br>protein<br>isolate,<br>calcium<br>caseinate,<br>milk protein<br>isolate,<br>sodium<br>caseinate,<br>and egg<br>albumin. | 25.59 | ----                                          | ----            | Body<br>Composition<br>Muscle Strength |
|                                             | Prot 2<br>(10) | PRO-B   | Men   | 66.5 ±<br>5.376 | 12 | YES | 1.26      | 1.7  | whey protein<br>concentrate<br>and whey<br>protein<br>isolate,<br>calcium<br>caseinate,<br>milk protein<br>isolate,<br>sodium<br>caseinate,<br>and egg<br>albumin. | 26.25 | ----                                          | ----            |                                        |
|                                             | Con<br>(10)    | PLA     | Men   | 64.6 ±<br>4.11  | 12 | YES | 1.376     | ---- | N/A                                                                                                                                                                | N/A   | maltodextrin<br>/sucrose/cho<br>colate cocoa, | 54.9            |                                        |
| <b>Chale, A., et<br/>al., 2013[16]</b>      | Prot<br>(42)   | Whey    | Mixed | 78.0 ± 4.0      | 24 | YES | 0.986     | 1.47 | Whey                                                                                                                                                               | 40    | ----                                          | ----            | Body<br>Composition<br>Muscle Strength |
|                                             | Con<br>(38)    | Control | Mixed | 77.3 ± 3.9      | 24 | YES | 0.9437    | ---- | N/A                                                                                                                                                                | N/A   | maltodextrin                                  | 45              | Physical<br>Function                   |

|                                         |             |                                                            |     |            |    |     |              |             |                      |                        |              |       |                                                          |
|-----------------------------------------|-------------|------------------------------------------------------------|-----|------------|----|-----|--------------|-------------|----------------------|------------------------|--------------|-------|----------------------------------------------------------|
| <b>Coburn, J. W., et al., 2006[17]</b>  | Prot (11)   | SUPP                                                       | Men | 21.3 ± 2.0 | 8  | YES | ----         | ----        | Whey                 | 28.57 + 8.857g leucine | ----         | ----  | Body Composition<br>Muscle Strength                      |
|                                         | Con (12)    | PLA                                                        | Men | 23.2 ± 1.9 | 8  | YES | ----         | ----        | N/A                  | N/A                    | maltodextrin | 37.43 |                                                          |
| <b>Deibert, P., et al., 2011[18]</b>    | Prot (13)   | RTS (resistance training with soy protein supplementation) | Men | 55.9 ± 3.5 | 12 | YES | ----         | ----        | Soy and Milk protein | 13.35                  | ----         | ----  | Body Composition                                         |
|                                         | Con (13)    | RT (resistance training only)                              | Men | 55.5 ± 4.8 | 12 | YES | ----         | ----        | N/A                  | N/A                    | NP           | N/A   |                                                          |
| <b>Dulac, M. C., et al., 2020[19]</b>   | Prot 1 (21) | F-PROT+MPT (whey)                                          | Men | 68.3 ± 5.3 | 12 | YES | ----         | ----        | Whey                 | 30                     | ----         | ----  | Body Composition<br>Handgrip strength<br>Muscle Strength |
|                                         | Prot 2 (20) | S-PROT+MPT (casein)                                        | Men | 69.0 ± 6.1 | 12 | YES | ----         | ----        | Casein               | 30                     | ----         | ----  | Physical Function                                        |
|                                         | Con (19)    | Placebo+MPT                                                | Men | 70.7 ± 8.6 | 12 | YES | ----         | ----        | N/A                  | N/A                    | Maltodextrin | 30    |                                                          |
| <b>Eliot, K. A., et al., 2008[20]</b>   | Prot (11)   | Whey protein                                               | Men | 65         | 14 | YES | 0.95 ± 1.66  | 1.04 ± 1.66 | Whey                 | 28                     | ----         | ----  | Body Composition                                         |
|                                         | Con (10)    | Placebo                                                    | Men | 65         | 14 | YES | 0.945 ± 1.58 | ----        | N/A                  | N/A                    | Gatorade     | 480   |                                                          |
| <b>Erskine, R. M., et al., 2012[21]</b> | Prot (17)   | PRO (whey)                                                 | Men | 23.1 ± 3.0 | 12 | YES | 1.28 ± 0.37  | 1.56 ± 0.33 | Whey                 | 17.1                   | ----         | ----  | Body Composition                                         |

|                                         |             |                   |     |             |    |     |             |             |                                      |      |              |      |                                     |
|-----------------------------------------|-------------|-------------------|-----|-------------|----|-----|-------------|-------------|--------------------------------------|------|--------------|------|-------------------------------------|
|                                         | Con (16)    | PLA               | Men | 23.7 ± 2.9  | 12 | YES | 1.36 ± 0.35 | ----        | N/A                                  | N/A  | Lactose      | 6.8  |                                     |
| <b>Farup, J., et al., 2014[22]</b>      | Prot 1 (11) | eccentric + WHD   | Men | 23.7 ± 4.64 | 12 | YES | ----        | ----        | Whey                                 | 19.5 | ----         | ---- | Muscle Strength                     |
|                                         | Prot 2 (11) | concentric + WHD  | Men | 23.7 ± 4.64 | 12 | YES | ----        | ----        | Whey                                 | 19.5 | ----         | ---- |                                     |
|                                         | Con 1 (11)  | eccentric + PLA   | Men | 24.1 ± 2.98 | 12 | YES | ----        | ----        | N/A                                  | N/A  | Carbohydrate | 39   |                                     |
|                                         | Con 2 (11)  | concentric + PLA. | Men | 24.1 ± 2.98 | 12 | YES | ----        | ----        | N/A                                  | N/A  | Carbohydrate | 39   |                                     |
| <b>Gryson, C., et al., 2014[23]</b>     | Prot 1 (9)  | TMP10t            | Men | 60.8 ± 9.7  | 16 | YES | ----        | ----        | Milk protein                         | 10   | ----         | ---- | Body Composition<br>Muscle Strength |
|                                         | Prot 2 (10) | PRO10             | Men | 60.8 ± 9.7  | 16 | YES | ----        | ----        | Soluble milk protein rich in leucine | 10   | ----         | ---- |                                     |
|                                         | Prot 3 (8)  | PRO10t            | Men | 60.8 ± 9.7  | 16 | YES | ----        | ----        | Soluble milk protein rich in leucine | 10   | ----         | ---- |                                     |
|                                         | Prot 4 (9)  | TMP4t             | Men | 60.8 ± 9.7  | 16 | YES | ----        | ----        | N/A                                  | N/A  | Milk protein | 4    |                                     |
|                                         | Prot 5 (9)  | TMP4              | Men | 60.8 ± 9.7  | 16 | YES | ----        | ----        | N/A                                  | N/A  | Milk protein | 4    |                                     |
| <b>Hartman, J. W., et al., 2007[24]</b> | Prot 1 (18) | Milk              | Men | 25          | 12 | YES | 1.2 ± 0.42  | 1.8 ± 0.42  | Milk protein                         | 25   | ----         | ---- | Body Composition<br>Muscle Strength |
|                                         | Prot 2 (18) | Soy               | Men | 25          | 12 | YES | 1.4 ± 0.42  | 1.65 ± 0.42 | Soy protein                          | 25   | ----         | ---- |                                     |
|                                         | Con (19)    | Control           | Men | 25          | 12 | YES | 1.56 ± 0.44 | ----        | N/A                                  | N/A  | Maltodextrin | 45   |                                     |

|                                         |             |       |       |              |    |     |             |             |                                                                                                           |                     |              |            |                                     |
|-----------------------------------------|-------------|-------|-------|--------------|----|-----|-------------|-------------|-----------------------------------------------------------------------------------------------------------|---------------------|--------------|------------|-------------------------------------|
| <b>Haun, C. T., et al., 2018[25]</b>    | Prot 1 (17) | Whey  | Men   | 20.87 ± 6.59 | 12 | YES | 1.1 ± 0.41  | 1.8 ± 0.41  | Whey                                                                                                      | 52.6                | ----         | ----       | Body Composition                    |
|                                         | Prot 2 (15) | Soy   | Men   | 20.85 ± 6.66 | 12 | YES | 1.1 ± 0.38  | 2.1 ± 0.38  | Soy                                                                                                       | 78.4                | ----         | ----       |                                     |
|                                         | Con (15)    | PLA   | Men   | 20.85 ± 4.41 | 12 | YES | 1.3 ± 0.38  | ----        | N/A                                                                                                       | N/A                 | Maltodextrin | Isocaloric |                                     |
| <b>Herda, A. A., et al., 2013[26]</b>   | Prot 1 (22) | BWPMV | Men   | 21.2 ± 2.7   | 8  | YES | 1.3 ± 1.1   | 1.8 ± 0.1   | Polyethylene glycosylated whey protein concentrate                                                        | 22.857 + 8g leucine | ----         | ----       | Body Composition<br>Muscle Strength |
|                                         | Prot 2 (22) | SWPMV | Men   | 21.0 ± 1.6   | 8  | YES | 1.4 ± 0.1   | 2.0 ± 0.1   | Whey                                                                                                      | 22.857              | ----         | ----       |                                     |
|                                         | Con (21)    | PLA   | Men   | 20.9 ± 1.7   | 8  | YES | 1.3 ± 0.1   | ----        | N/A                                                                                                       | N/A                 | Maltodextrin | 27         |                                     |
| <b>Hida, A., et al., 2012[27]</b>       | Prot (15)   | Prot  | Women | 20           | 8  | YES | 1.08 ± 0.27 | 1.23 ± 0.27 | Egg White protein                                                                                         | 15                  | ----         | ----       | Body Composition<br>Muscle Strength |
|                                         | Con (15)    | Carb  | Women | 20           | 8  | YES | 1.00 ± 0.27 | ----        | N/A                                                                                                       | N/A                 | Maltodextrin | 17.5       |                                     |
| <b>Hoffman, J. R., et al., 2007[28]</b> | Prot (11)   | PR    | Men   | 20.3 ± 1.6   | 12 | YES | ----        | 2 ± 0.12    | proprietary blend of milk protein concentrate, whey protein concentrate, L-glutamine, and dried egg white | 66                  | ----         | ----       | Body Composition<br>Muscle Strength |
|                                         | Con (10)    | PL    | Men   | 21.0 ± 1.2   | 12 | YES | 1.24 ± 0.12 | ----        | N/A                                                                                                       | N/A                 | Maltodextrin | 63         |                                     |



|                                          |             |          |       |            |    |     |             |             |                                                                                                                                    |       |              |      |                                     |
|------------------------------------------|-------------|----------|-------|------------|----|-----|-------------|-------------|------------------------------------------------------------------------------------------------------------------------------------|-------|--------------|------|-------------------------------------|
| <b>Hoffman, J. R., et al., 2009[29]</b>  | Prot 1 (13) | AM/PM    | Men   | 19.6 ± 1.3 | 10 | YES | 1.40 ± 0.22 | 2.28 ± 0.78 | proprietary blend of protein (enzymatically hydrolyzed collagen protein isolate, whey protein isolate, and casein protein isolate) | 84    | ----         | ---- | Body Composition<br>Muscle Strength |
|                                          | Prot 2 (13) | PRE/POST | Men   | 19.9 ± 1.3 | 10 | YES | 1.80 ± 0.98 | 2.16 ± 0.67 | proprietary blend of protein (enzymatically hydrolyzed collagen protein isolate, whey protein isolate, and casein protein isolate) | 84    | ----         | ---- |                                     |
|                                          | Con (7)     | CTR      | Men   | 20.7 ± 1.1 | 10 | YES | 1.67 ± 0.70 | ----        | N/A                                                                                                                                | N/A   | NP           | N/A  |                                     |
| <b>Iglay, H. B., et al., 2009[30]</b>    | Prot (18)   | HP       | Mixed | 65         | 12 | YES | 1.1 ± 0.424 | 1.2 ± 0     | Increase from Diet                                                                                                                 | ----  | ----         | ---- | Body Composition                    |
|                                          | Con (18)    | LP       | Mixed | 65         | 12 | YES | 0.9 ± 0.424 | ----        | Decrease from Diet                                                                                                                 | ----  | NP           | N/A  |                                     |
| <b>Kerksick, C. M., et al., 2006[31]</b> | Prot (10)   | WC       | Men   | 31 ± 8     | 10 | YES | 2.1 ± 0.3   | 2.2 ± 0.6   | Whey, casein                                                                                                                       | 40, 8 | ----         | ---- | Body Composition<br>Muscle Strength |
|                                          | Con (11)    | P        | Men   | 31 ± 8     | 10 | YES | 1.6 ± 0.5   | ----        | N/A                                                                                                                                | N/A   | Carbohydrate | 48   |                                     |

|                                       |             |               |       |              |    |     |             |             |                                  |                                                       |                            |            |                                     |
|---------------------------------------|-------------|---------------|-------|--------------|----|-----|-------------|-------------|----------------------------------|-------------------------------------------------------|----------------------------|------------|-------------------------------------|
| <b>Kim, H. H., et al., 2014[32]</b>   | Prot (9)    | RE + HP diet  | Men   | 25.0 ± 2.4   | 12 | YES | ----        | ----        | Increase from Diet (30% protein) | ----                                                  | ----                       | ----       | Body Composition                    |
|                                       | Con (9)     | RE + St diet  | Men   | 23.6 ± 2.8   | 12 | YES | ----        | ----        | Standard Diet (15% protein)      | ----                                                  | NP                         | N/A        |                                     |
| <b>Kim, D. and Park, Y., 2020[33]</b> | Prot 1 (32) | Tertile 2     | Mixed | 76.79 ± 3.42 | 12 | NO  | 0.79 ± 0.21 | 1.2         | Whey                             | Enough to reach 1.2g/kg/d when added to habitual diet | ----                       | ----       | Physical Function                   |
|                                       | Prot 2 (32) | Tertile 3     | Mixed | 77.06 ± 3.80 | 12 | NO  | 0.72 ± 0.20 | 1.5         | Whey                             | Enough to reach 1.5g/kg/d when added to habitual diet | ----                       | ----       |                                     |
|                                       | Con (32)    | Tertile 1     | Mixed | 76.97 ± 3.78 | 12 | NO  | 0.8         | ----        | N/A                              | N/A                                                   | Maltodextrin               | ----       |                                     |
| <b>Kirmse, M., et al., 2019[34]</b>   | Prot (29)   | Col           | Men   | 24 ± 2       | 12 | YES | ----        | 1.81 ± 0.42 | collagen peptides                | 15                                                    | ----                       | ----       | Body Composition<br>Muscle Strength |
|                                       | Con (28)    | Pla           | Men   | 24 ± 3       | 12 | YES | 1.74 ± 0.50 | ----        | N/A                              | N/A                                                   | noncaloric silicon dioxide | 15         |                                     |
| <b>Leenders, M., et al., 2013[35]</b> | Prot 1 (12) | Women Protein | Women | 72 ± 6.92    | 24 | YES | 1.2 ± 0.49  | 1.44        | Milk protein                     | 15                                                    | ----                       | ----       | Body Composition<br>Muscle Strength |
|                                       | Prot 2 (15) | Men Protein   | Men   | 70 ± 3.87    | 24 | YES | 1.1 ± 0.54  | 1.28        | Milk protein                     | 15                                                    | ----                       | ----       |                                     |
|                                       | Con 1 (12)  | Women Placebo | Women | 69 ± 3.46    | 24 | YES | 1.2 ± 0.49  | ----        | N/A                              | N/A                                                   | Lactose, calcium           | 7.13, 0.42 |                                     |

|                                          |                |             |       |            |    |     |             |             |                                                          |     |                     |            |      |                                     |
|------------------------------------------|----------------|-------------|-------|------------|----|-----|-------------|-------------|----------------------------------------------------------|-----|---------------------|------------|------|-------------------------------------|
|                                          | Con 2<br>(14)  | Men Placebo | Men   | 70 ± 3.74  | 24 | YES | 1.1 ± 0.54  | ----        | N/A                                                      | N/A | Lactose,<br>calcium | 7.13, 0.42 |      |                                     |
| <b>Lockwood, C. M., et al., 2017[36]</b> | Prot 1<br>(13) | WPC         | Men   | 21.3       | 8  | YES | 1.1 ± 0.54  | 1.85 ± 0.36 | 80% whey protein concentrate                             |     | 30                  | ----       | ---- | Body Composition<br>Muscle Strength |
|                                          | Prot 2<br>(15) | WPC-L       | Men   | 21.8       | 8  | YES | 1.31 ± 0.58 | 1.97 ± 0.35 | high-lactoferrin-containing whey protein concentrate 80% |     | 30                  | ----       | ---- |                                     |
|                                          | Prot 3<br>(13) | WPH         | Men   | 21.5       | 8  | YES | 1.33 ± 0.61 | 1.9 ± 0.4   | extensively hydrolyzed whey protein concentrate 80%      |     | 30                  | ----       | ---- |                                     |
|                                          | Con<br>(15)    | PLA         | Men   | 20.9       | 8  | YES | 1.58 ± 0.77 | ----        | N/A                                                      | N/A | Dextrose            |            | 30   |                                     |
| <b>Maesta, N., et al., 2007[37]</b>      | Prot 1<br>(10) | SP          | Women | 61.3 ± 5.3 | 16 | NO  | ----        | ----        | Soy protein in skimmed milk                              |     | 12.2                | ----       | ---- | Body Composition                    |
|                                          | Prot 2<br>(14) | SPE         | Women | 57.6 ± 6.7 | 16 | YES | ----        | ----        | Soy protein in skimmed milk                              |     | 12.2                | ----       | ---- |                                     |
|                                          | Con 1<br>(11)  | PL          | Women | 57.9 ± 6.9 | 16 | NO  | ----        | ----        | N/A                                                      | N/A | Maltodextrin        |            | 25   |                                     |
|                                          | Con 2<br>(11)  | PLE         | Women | 60.7 ± 7.1 | 16 | YES | ----        | ----        | N/A                                                      | N/A | Maltodextrin        |            | 25   |                                     |

|                                            |             |         |       |           |    |     |             |             |                          |      |              |      |                                                           |
|--------------------------------------------|-------------|---------|-------|-----------|----|-----|-------------|-------------|--------------------------|------|--------------|------|-----------------------------------------------------------|
| <b>Mobley, C. B., et al., 2017[38]</b>     | Prot 2 (17) | WPC     | Men   | 21± 4.12  | 12 | YES | 1.1 ± 0.41  | 1.8 ± 0.41  | Whey protein concentrate | 52.6 | ----         | ---- | Body Composition<br>Muscle Strength                       |
|                                            | Prot 3 (14) | WPH     | Men   | 21± 3.74  | 12 | YES | 1.2 ± 0.37  | 1.9 ± 0.37  | Whey protein hydrolysate | 50.8 | ----         | ---- |                                                           |
|                                            | Prot 4 (15) | SPC     | Men   | 21± 3.87  | 12 | YES | 1.1 ± 0.39  | 2.1± 0.39   | Soy protein concentrate  | 78.4 | ----         | ---- |                                                           |
|                                            | Con 1 (15)  | PLA     | Men   | 21± 3.87  | 12 | YES | 1.3 ± 0.39  | ----        | N/A                      | N/A  | Maltodextrin | 88   |                                                           |
| <b>Mori, H. and Tokuda, Y., 2018[39]</b>   | Prot (25)   | EX+PRO  | Women | 70.6± 4.2 | 24 | YES | 1.3 ± 0.0   | 1.82        | Whey                     | 22.3 | ----         | ---- | Handgrip strength<br>Muscle Strength<br>Physical Function |
|                                            | Con (25)    | EX      | Women | 70.6± 4.6 | 24 | YES | 1.4 ± 0.0   | ----        | N/A                      | N/A  | NP           | N/A  |                                                           |
| <b>Nabuco, H. C. G., et al., 2018[40]</b>  | Prot 1 (24) | WP-PLA  | Women | 67.5± 5.2 | 12 | YES | 0.92 ± 0.20 | 1.38 ± 0.26 | Whey                     | 35   | ----         | ---- | Body Composition<br>Muscle Strength<br>Physical Function  |
|                                            | Prot 2 (23) | PLA-WP  | Women | 66.2± 9.4 | 12 | YES | 0.94 ± 0.36 | 1.49 ± 0.46 | Whey                     | 35   | ----         | ---- |                                                           |
|                                            | Con (23)    | PLA-PLA | Women | 66.5± 7.2 | 12 | YES | 0.95 ± 0.27 | ----        | N/A                      | N/A  | Maltodextrin | 35   |                                                           |
| <b>Nabuco, H. C. G., et al., 2019a[41]</b> | Prot 1 (24) | WP-PLA  | Women | 67.5± 5.2 | 12 | YES | 0.92 ± 0.20 | 1.4         | Whey                     | 35   | ----         | ---- | Body Composition                                          |
|                                            | Prot 2 (23) | PLA-WP  | Women | 66.2± 9.4 | 12 | YES | 0.94 ± 0.36 | 1.4         | Whey                     | 35   | ----         | ---- |                                                           |

|                                            |            |         |       |              |    |     |             |             |                                        |      |                   |      |      |                                                          |
|--------------------------------------------|------------|---------|-------|--------------|----|-----|-------------|-------------|----------------------------------------|------|-------------------|------|------|----------------------------------------------------------|
|                                            | Con (23)   | PLA-PLA | Women | 66.5 ± 7.2   | 12 | YES | 0.95 ± 0.27 |             | N/A                                    |      | Sugar Free Drinks |      |      |                                                          |
| <b>Nabuco, H. C. G., et al., 2019b[42]</b> | Prot (15)  | PRO     | Women | 69.2 ± 4.1   | 12 | YES | 0.94 ± 0.3  | 1.48        | Whey                                   |      | 35                | ---- | ---- | Muscle Strength                                          |
|                                            | Con (15)   | CON     | Women | 68.4 ± 4.5   | 12 | YES | 0.96 ± 0.22 | ----        | N/A                                    | N/A  | Maltodextrin      |      | 35   |                                                          |
| <b>Naclerio, F., et al., 2017a[43]</b>     | Prot 1 (8) | Beef    | Men   | 26 ± 8       | 8  | YES | 1.49 ± 0.46 | 1.69 ± 0.47 | hydrolyzed beef protein powder         |      | 16.4              | ---- | ---- | Body Composition<br>Muscle Strength                      |
|                                            | Prot 2 (8) | Whey    | Men   | 26 ± 4       | 8  | YES | 1.52 ± 0.45 | 1.72 ± 0.52 | whey isolate                           |      | 18                | ---- | ---- |                                                          |
|                                            | Con (8)    | CHO     | Men   | 29 ± 5       | 8  | YES | 1.45 ± 0.24 | 1.44 ± 0.24 | N/A                                    | N/A  | Carbohydrates     |      | 45   |                                                          |
| <b>Naclerio, F., et al., 2017b[44]</b>     | Prot 1 (9) | Beef    | Mixed | 25.6 ± 5.3   | 8  | YES | 1.45 ± 0.66 | 1.70 ± 0.70 | hydrolyzed beef protein powder         |      | 16.4              | ---- | ---- | Body Composition<br>Muscle Strength                      |
|                                            | Prot 2 (9) | Whey    | Mixed | 27.6 ± 5.2   | 8  | YES | 1.47 ± 0.75 | 1.77 ± 0.92 | whey isolate                           |      | 18                | ---- | ---- |                                                          |
|                                            | Con (9)    | CHO     | Mixed | 24.4 ± 7.1   | 8  | YES | 1.12 ± 0.56 | ----        | N/A                                    | N/A  | Carbohydrates     |      | 45   |                                                          |
| <b>Nahas, P. C., et al., 2019[45]</b>      | Prot (22)  | HP      | Women | 64.7 ± 13.13 | 10 | YES | 0.76 ± 0.23 | 1.17 ± 0.28 | Increase from Diet to reach ~1.2g/kg/d | ---- | ----              | ---- | ---- | Body Composition<br>Muscle Strength<br>Physical Function |
|                                            | Con (25)   | NP      | Women | 62.0 ± 13    | 10 | YES | 0.76 ± 0.3  | 0.85 ± 0.2  | Increase from Diet to reach ~0.8g/kg/d | ---- | NP                |      | N/A  |                                                          |

|                                               |             |         |       |             |    |     |            |            |                              |      |                                        |            |                                                            |
|-----------------------------------------------|-------------|---------|-------|-------------|----|-----|------------|------------|------------------------------|------|----------------------------------------|------------|------------------------------------------------------------|
| <b>Nakayama, K., et al., 2020[46]</b>         | Prot (61)   | Milk    | Mixed | 71.4 ± 6.25 | 24 | YES | 1.28       | 1.48       | acidified milk protein drink | 10   | ----                                   | ----       | Body Composition<br>Handgrip strength<br>Physical Function |
|                                               | Con (61)    | Pla     | Mixed | 70.4 ± 5.47 | 24 | YES | 1.27       | ----       | N/A                          | N/A  | maltodextrin                           | 16         |                                                            |
| <b>Negro, M., et al., 2014[47]</b>            | Prot (12)   | FG      | Men   | 23.7 ± 2.5  | 8  | YES | ----       | 1.29       | Lean beef protein            | 20   | ----                                   | ----       | Body Composition<br>Muscle Strength                        |
|                                               | Con (14)    | CG      | Men   | 23.9 ± 4.2  | 8  | YES | 1          | ----       | N/A                          | N/A  | NP                                     | N/A        |                                                            |
| <b>Norton, C. et al., 2016[48]</b>            | Prot (31)   | Pro     | Mixed | 62.2 ± 4.7  | 31 | NO  | 1.2 ± 0.3  | 1.6 ± 0.3  | Milk protein matrix          | N/A  | ----                                   | N/A        | Body Composition                                           |
|                                               | Con (29)    | Con     | Mixed | 59.5 ± 5.8  | 29 | NO  | 1.2 ± 0.3  |            | N/A                          | N/A  | Maltodextrin                           | N/A        |                                                            |
| <b>Obradovic, J., et al., 2020[49]</b>        | Prot 1 (10) | WP      | Men   | 23±4        | 8  | YES | ----       | ----       | Whey                         | 79.5 | ----                                   | ----       | Muscle Strength                                            |
|                                               | Con (10)    | PLA     | Men   | 23±4        | 8  | YES | ----       | ----       | N/A                          | N/A  | maltodextrin                           | 10         |                                                            |
| <b>Oertzen-Hagemann, V., et al., 2019[50]</b> | Prot (12)   | COL     | Men   | 24.4± 2.3   | 12 | YES | ----       | 1.66       | collagen hydrolysate         | 15   | ----                                   | ----       | Body Composition<br>Muscle Strength                        |
|                                               | Con (13)    | PLA     | Men   | 23.9± 2.9   | 12 | YES | 1.86       | ----       | N/A                          | N/A  | non-caloric silicon dioxide supplement | ----       |                                                            |
| <b>Ormsbee, M. J., et al., 2018[51]</b>       | Prot (29)   | Protein | Mixed | 21.0 ± 3.23 | 24 | YES | 1.1 ± 0.54 | 2.3 ± 0.54 | Protein supplement           | 84   | ----                                   | ----       | Body Composition                                           |
|                                               | Con (22)    | Control | Mixed | 20.3 ± 2.35 | 24 | YES | 1.0 ± 0.47 | ----       | N/A                          | N/A  | Carbohydrates                          | isocaloric |                                                            |

|                                                |             |         |       |              |    |     |           |           |                          |       |               |            |                                                                               |
|------------------------------------------------|-------------|---------|-------|--------------|----|-----|-----------|-----------|--------------------------|-------|---------------|------------|-------------------------------------------------------------------------------|
| <b>Orsatti, F. L., et al., 2018[52]</b>        | Prot (16)   | SOY+RT  | Women | 56.8 ± 6.6   | 16 | YES | 1 ± 0.3   | 1.4 ± 0.3 | soy protein              | 31.4  | ----          | ----       | Body Composition<br>Muscle Strength                                           |
|                                                | Con (16)    | PL+RT   | Women | 58.8 ± 8.9   | 16 | YES | 1 ± 0.3   | ----      | N/A                      | N/A   | maltodextrin  | 25         |                                                                               |
| <b>Ottestad, I., et al., 2017[53]</b>          | Prot (17)   | Protein | Women | 76.8 ± 6.2   | 12 | NO  | 1.0 ± 0.3 | 1.4 ± 0.5 | protein-enriched milk    | 40    | ----          | ----       | Body Composition<br>Handgrip strength<br>Muscle Strength<br>Physical Function |
|                                                | Con (19)    | Control | Women | 77.1 ± 4.7   | 12 | NO  | 0.9 ± 0.4 | ----      | N/A                      | N/A   | carbohydrate  | isocaloric |                                                                               |
| <b>Ozan, M., et al., 2020[54]</b>              | Prot (10)   | PR      | Men   | 21.29 ± 2.44 | 10 | YES | ----      | ----      | Whey                     | 106.7 | ----          | ----       | Body Composition                                                              |
|                                                | Con (10)    | PLA     | Men   | 20.14 ± 2.19 | 10 | YES | ----      | ----      | N/A                      | N/A   | Colored water | ----       |                                                                               |
| <b>Paoli, A., et al., 2015[55]</b>             | Prot (9)    | HP      | Men   | 24.9 ± 5.3   | 8  | YES | ----      | 1.8       | Whey                     | 35    | ----          | ----       | Body Composition<br>Handgrip strength                                         |
|                                                | Con (9)     | NP      | Men   | 24.9 ± 5.3   | 8  | YES | 0.85      | ----      | N/A                      | N/A   | Water         | ----       |                                                                               |
| <b>Pihoker, A. A., et al., 2019[56]</b>        | Prot 1 (17) | PRE     | Women | 20.5 ± 2.2   | 6  | YES | ----      | 1.21      | Protein shake            | 7.14  | ----          | ----       | Body Composition<br>Muscle strength                                           |
|                                                | Prot 2 (17) | POST    | Women | 20.5 ± 2.2   | 6  | YES | ----      | 1.21      | Protein shake            | 7.14  | ----          | ----       |                                                                               |
|                                                | Con (9)     | CON     | Women | 20.5 ± 2.2   | 6  | YES | 1.1       | ----      | N/A                      | N/A   | NP            | N/A        |                                                                               |
| <b>Planella-Farrugia, C., et al., 2019[57]</b> | Prot (9)    | RENS    | Mixed | 71.2 ± 3.3   | 16 | YES | ----      | 1.08      | calcium caseinate powder | 12.86 | ----          | ----       | Body Composition<br>Handgrip strength                                         |
|                                                | Con (14)    | RE      | Mixed | 64.9 ± 5.5   | 16 | YES | 0.9       | ----      | N/A                      | N/A   | NP            | N/A        |                                                                               |

|                                         |             |         |       |             |    |     |             |             |                                        |      |              |      |                                     |
|-----------------------------------------|-------------|---------|-------|-------------|----|-----|-------------|-------------|----------------------------------------|------|--------------|------|-------------------------------------|
| <b>Rankin, J. W., et al., 2004[58]</b>  | Prot (10)   | Milk    | Men   | 20.5 ± 1.96 | 10 | YES | 1.2 ± 0.38  | 1.41        | Milk protein                           | 16.6 | ----         | ---- | Body Composition<br>Muscle strength |
|                                         | Con (9)     | CHO     | Men   | 21 ± 0.36   | 10 | YES | 1.2 ± 0.36  | ----        | N/A                                    | N/A  | Gatorade     | ---- |                                     |
| <b>Reidy, P. T., et al., 2016[59]</b>   | Prot 1 (23) | PB      | Men   | 24 ± 4.8    | 12 | YES | 1.33 ± 0.48 | 1.54 ± 0.48 | soy-dairy blend                        | 22   | ----         | ---- | Body Composition<br>Muscle strength |
|                                         | Prot 2 (22) | WP      | Men   | 25 ± 4.69   | 12 | YES | 1.29 ± 0.47 | 1.64 ± 0.52 | Whey protein isolate                   | 22   | ----         | ---- |                                     |
|                                         | Con (23)    | MDP     | Men   | 25 ± 4.8    | 12 | YES | 1.23 ± 0.53 | ----        | N/A                                    | N/A  | Maltodextrin | 22   |                                     |
| <b>Rossato, L. T., et al., 2017[60]</b> | Prot (11)   | HP      | Women | 63.4 ± 7.6  | 10 | YES | 0.82 ± 0.29 | 1.18 ± 0.3  | Increase from Diet to reach ~1.2g/kg/d | ---- | ----         | ---- | Body Composition<br>Muscle strength |
|                                         | Con (12)    | NP      | Women | 63.0 ± 8.6  | 10 | YES | 0.87 ± 0.29 | ----        | Increase from Diet to reach ~0.8g/kg/d | ---- | NP           | N/A  |                                     |
| <b>Rozenek, R., et al., 2002[61]</b>    | Prot 1 (26) | CHO/PRO | Men   | 23 ± 4.6    | 8  | YES | 1.4 ± 0.7   | 3.11        | Milk + protein supplement              | 106  | ----         | ---- | Body Composition<br>Muscle strength |
|                                         | Con 1 (25)  | CHO     | Men   | 23.4 ± 4.7  | 8  | YES | 1.4 ± 0.6   | 1.64        | Milk                                   | 24   | ----         | ---- |                                     |
|                                         | Con 2 (21)  | CTRL    | Men   | 23.1 ± 3.9  | 8  | YES | 1.3 ± 0.6   | ----        | N/A                                    | N/A  | NP           | N/A  |                                     |
| <b>Sharp, M. H., et al., 2018[62]</b>   | Prot 1 (10) | WPC     | Mixed | 19 ± 2      | 8  | YES | ----        | 2.2 ± 0.3   | Whey Protein Concentrate               | 46   | ----         | ---- | Body Composition<br>Muscle strength |



|                                                     |                |              |       |                 |    |     |            |           |                                                 |                 |                                    |      |                                                                |
|-----------------------------------------------------|----------------|--------------|-------|-----------------|----|-----|------------|-----------|-------------------------------------------------|-----------------|------------------------------------|------|----------------------------------------------------------------|
|                                                     | Prot 2<br>(10) | Beef         | Mixed | 22 ± 4          | 8  | YES | ----       | 2.2 ± 0.2 | isolated beef<br>protein                        | 46              | ----                               | ---- |                                                                |
|                                                     | Prot 3<br>(11) | Chx          | Mixed | 21 ± 2          | 8  | YES | ----       | 2.1 ± 0.3 | hydrolyzed<br>chicken<br>protein                | 46              | ----                               | ---- |                                                                |
|                                                     | Con<br>(10)    | Control      | Mixed | 21 ± 2          | 8  | YES | 2 ± 0.2    | ----      | N/A                                             | N/A             | Maltodextrin                       | 48   |                                                                |
| <b>Snijders, T., et al., 2015 [63]</b>              | Prot<br>(20)   | PRO          | Men   | 23 ± 4.47       | 12 | YES | 1.4 ± 0.45 | 1.9       | casein<br>hydrolysate,<br>casein                | 13.75,<br>13.75 | ----                               | ---- | Body<br>Composition<br>Muscle Strength                         |
|                                                     | Con<br>(19)    | PLA          | Men   | 21 ± 4.36       | 12 | YES | 1.3 ± 0.44 | ----      | N/A                                             | N/A             | Non-caloric<br>placebo<br>beverage | ---- |                                                                |
| <b>Spillane, M. and Willoughby, D. S., 2016[64]</b> | Prot<br>(11)   | HPC          | Men   | 21.38 ±<br>4.07 | 8  | YES | ----       | 2.42      | Whey                                            | 94              | ----                               | ---- | Body<br>Composition                                            |
|                                                     | Con<br>(10)    | HC           | Men   | 19.38 ±<br>1.18 | 8  | YES | 1.03       | ----      | N/A                                             | N/A             | maltodextros<br>e                  | 312  |                                                                |
| <b>Taylor, L. W., et al., 2016[65]</b>              | Prot (8)       | WP           | Women | 20 ± 2          | 8  | YES | ----       | 1.37      | Whey                                            | 48              | ----                               | ---- | Body<br>Composition<br>Muscle Strength                         |
|                                                     | Con (6)        | MD           | Women | 21 ± 3          | 8  | YES | 1.12       | ----      | N/A                                             | N/A             | maltodextrin                       | 48   |                                                                |
| <b>van Dongen, E. J. I., et al., 2020[66]</b>       | Prot<br>(82)   | Intervention | Mixed | 74.7 ± 5.8      | 12 | YES | 1.12       | 1.46      | Increase<br>from Diet to<br>reach<br>~1.2g/kg/d | 25              | ----                               | ---- | Body<br>Composition<br>Muscle Strength<br>Physical<br>Function |
|                                                     | Con<br>(86)    | Control      | Mixed | 75.9 ± 6.5      | 12 | YES | 1.04       | ----      | N/A                                             | N/A             | NP                                 | N/A  |                                                                |

|                                         |             |         |       |            |    |     |             |             |                        |            |                                    |            |                                                          |
|-----------------------------------------|-------------|---------|-------|------------|----|-----|-------------|-------------|------------------------|------------|------------------------------------|------------|----------------------------------------------------------|
| <b>Vangsoe, M. T., et al., 2018[67]</b> | Prot (9)    | Pro     | Men   | 24.2 ± 2.6 | 8  | YES | 1.6 ± 0.3   | 2.3 ± 0.3   | Insect protein         | 32         | ----                               | ----       | Body Composition<br>Muscle strength                      |
|                                         | Con (9)     | Con     | Men   | 24.2 ± 2.6 | 8  | YES | 1.7 ± 0.3   | ----        | N/A                    | N/A        | Potato flour and Maxim Sport drink | Isocaloric |                                                          |
| <b>Verdijk, L. B., et al., 2009[68]</b> | Prot (13)   | Protein | Men   | 72 ± 2     | 12 | YES | 1.1 ± 0.36  | 1.35        | casein hydrolysate     | 20         | ----                               | ----       | Body Composition<br>Muscle strength                      |
|                                         | Con (13)    | Placebo | Men   | 72 ± 2     | 12 | YES | 1.1 ± 0.36  | ----        | N/A                    | N/A        | Water                              | ----       |                                                          |
| <b>Volek, J. S., et al., 2013[69]</b>   | Prot 1 (19) | Whey    | Mixed | 22.8 ± 3.7 | 40 | YES | 1.27 ± 0.4  | 1.39 ± 0.18 | Whey                   | 21.6       | ----                               | ----       | Body Composition<br>Muscle strength                      |
|                                         | Prot 2 (22) | Soy     | Mixed | 24.0 ± 2.9 | 40 | YES | 1.27 ± 0.4  | 1.35 ± 0.13 | Soy                    | 20         | ----                               | ----       |                                                          |
|                                         | Con (22)    | Carb    | Mixed | 22.3 ± 3.1 | 40 | YES | 1.06 ± 0.13 | ----        | N/A                    | N/A        | maltodextrin                       | isocaloric |                                                          |
| <b>Walker, T. B., et al., 2010[70]</b>  | Prot (18)   | WPL     | Men   | 26.9       | 8  | YES | ----        | ----        | Whey Protein, leucine  | 39.4, 12.4 | ----                               | ----       | Body Composition<br>Muscle strength                      |
|                                         | Con (12)    | Placebo | Men   | 26.9       | 8  | YES | ----        | ----        | N/A                    | N/A        | CHO                                | isocaloric |                                                          |
| <b>Watanabe, K., et al., 2018[71]</b>   | Prot 1 (13) | APP-CN  | Mixed | 69.2 ± 4.1 | 6  | NO  | 1.3 ± 0.4   | 1.5 ± 0.4   | fish protein (in soup) | 5          | ----                               | ----       | Body Composition<br>Muscle strength<br>Physical Function |
|                                         | Prot 2 (12) | APP-RT  | Mixed | 69.8 ± 5.5 | 6  | YES | 1.4 ± 0.6   | 1.6 ± 0.7   | fish protein (in soup) | 5          | ----                               | ----       |                                                          |
|                                         | Con 1 (12)  | PLA-CN  | Mixed | 69.5 ± 2.9 | 6  | NO  | 1.3 ± 0.4   | ----        | N/A                    | N/A        | Placebo soup                       | ----       |                                                          |
|                                         | Con 2 (13)  | PLA-RT  | Mixed | 68.3 ± 5.9 | 6  | YES | 1.4 ± 0.3   | ----        | N/A                    | N/A        | Placebo soup                       | ----       |                                                          |

|                                            |            |         |       |             |     |     |             |      |                                       |       |                       |             |                                                           |
|--------------------------------------------|------------|---------|-------|-------------|-----|-----|-------------|------|---------------------------------------|-------|-----------------------|-------------|-----------------------------------------------------------|
| <b>Weisgarber, K. D., et al., 2012[72]</b> | Prot (9)   | PRO     | Mixed | 24.58 ± 1.8 | 8   | YES | ----        | 1.53 | Whey                                  | 26.49 | ----                  | ----        | Body Composition<br>Muscle strength                       |
|                                            | Con (8)    | PLA     | Mixed | 23.6 ± 4.4  | 8   | YES | 0.99        | ---- | N/A                                   | N/A   | Maltodextrin, sucrose | 16.52, 8.26 |                                                           |
| <b>Willoughby, D. S., et al., 2007[73]</b> | Prot (10)  | PRO     | Men   | 19 ± 1.58   | 10  | YES | 2.31 (0.82) | 2.76 | Whey and casein mix, free amino acids | 28,12 | ----                  | ----        | Body Composition<br>Muscle strength                       |
|                                            | Con (9)    | PLC     | Men   | 19 ± 1.58   | 10  | YES | 2.24 (0.85) | ---- | N/A                                   | N/A   | dextrose              | 40          |                                                           |
| <b>Zhu, K., et al., 2015[74]</b>           | Prot (101) | Protein | Women | 74.2 ± 2.8  | 108 | NO  | 1.2 ± 0.3   | 1.6  | Whey protein in skim milk             | 30    | ----                  | ----        | Handgrip strength<br>Muscle Strength<br>Physical Function |
|                                            | Con (95)   | Placebo | Women | 74.3 ± 2.6  | 108 | NO  | 1.1 ± 0.3   | ---- | N/A                                   | N/A   | skim milk             | 2.1         |                                                           |

NP: No Placebo; PLC : Placebo; WP: Whey Protein

#### References:

1. Aas SN, Seynnes O, Benestad HB, Raastad T. Strength training and protein supplementation improve muscle mass, strength, and function in mobility-limited older adults: a randomized controlled trial. *Aging Clinical and Experimental Research*. 2020;32:605-16. doi:10.1007/s40520-019-01234-2
2. Aleman-Mateo H, Carreon VR, Macias L, Astiazaran-Garcia H, Gallegos-Aguilar AC, Enriquez JRR. Nutrient-rich dairy proteins improve appendicular skeletal muscle mass and physical performance, and attenuate the loss of muscle strength in older men and women subjects: a single-blind randomized clinical trial. *Clinical interventions in aging*. 2014;9:1517-25. doi:10.2147/CIA.S67449

3. Amasene M, Besga A, Echeverria I, Urquiza M, Ruiz JR, Rodriguez-Larrad A, et al. Effects of Leucine-Enriched Whey Protein Supplementation on Physical Function in Post-Hospitalized Older Adults Participating in 12-Weeks of Resistance Training Program: A Randomized Controlled Trial. *Nutrients*. 2019;11:doi:10.3390/nu11102337
4. Antonio J, Peacock CA, Ellerbroek A, Fromhoff B, Silver T. The effects of consuming a high protein diet (4.4 g/kg/d) on body composition in resistance-trained individuals. *Journal of the International Society of Sports Nutrition*. 2014;11:19. doi:10.1186/1550-2783-11-19
5. Antonio J, Ellerbroek A, Silver T, Orris S, Scheiner M, Gonzalez A, et al. A high protein diet (3.4 g/kg/d) combined with a heavy resistance training program improves body composition in healthy trained men and women - a follow-up investigation. *Journal of the International Society of Sports Nutrition*. 2015;12:39. doi:10.1186/s12970-015-0100-0
6. Aristizabal JC, Freidenreich DJ, Volk BM, Kupchak BR, Saenz C, Maresh CM, et al. Effect of resistance training on resting metabolic rate and its estimation by a dual-energy X-ray absorptiometry metabolic map. *Eur J Clin Nutr*. 2015;69:831-6. doi:10.1038/ejcn.2014.216
7. Arnarson A, Geirsdottir OG, Ramel A, Briem K, Jonsson PV, Thorsdottir I. Effects of whey proteins and carbohydrates on the efficacy of resistance training in elderly people: double blind, randomised controlled trial. *European Journal of Clinical Nutrition*. 2013;67:821-6. doi:10.1038/ejcn.2013.40
8. Babault N, Deley G, Le Ruyet P, Morgan F, Allaert FA. Effects of soluble milk protein or casein supplementation on muscle fatigue following resistance training program: a randomized, double-blind, and placebo-controlled study. *Journal of the International Society of Sports Nutrition*. 2014;11:36. doi:10.1186/1550-2783-11-36
9. Bartholomae E, Incollingo A, Vizcaino M, Wharton C, Johnston CS. Mung Bean Protein Supplement Improves Muscular Strength in Healthy, Underactive Vegetarian Adults. *Nutrients*. 2019;11:doi:10.3390/nu11102423
10. Bridge A, Brown J, Snider H, Nasato M, Ward WE, Roy BD, et al. Greek Yogurt and 12 Weeks of Exercise Training on Strength, Muscle Thickness and Body Composition in Lean, Untrained, University-Aged Males. *Frontiers in Nutrition*. 2019;6:55. doi:10.3389/fnut.2019.00055
11. Brown EC, DiSilvestro RA, Babaknia A, Devor ST. Soy versus whey protein bars: Effects on exercise training impact on lean body mass and antioxidant status. *Nutrition Journal*. 2004;3:22. doi:10.1186/1475-2891-3-22
12. Burke DG, Chilibeck PD, Davidson KS, ow DG, Farthing J, Smith-Palmer T. The effect of whey protein supplementation with and without creatine monohydrate combined with resistance training on lean tissue mass and muscle strength. *International journal of sport nutrition and exercise metabolism*. 2001;11:349-64. doi:10.1123/ijsnem.11.3.349
13. Campbell BI, Aguilar D, Conlin L, Vargas A, Schoenfeld BJ, Corson A, et al. Effects of High Versus Low Protein Intake on Body Composition and Maximal Strength in Aspiring Female Physique Athletes Engaging in an 8-Week Resistance Training Program. *International Journal of Sport Nutrition and Exercise Metabolism*. 2018;28:580-5. doi:10.1123/ijsnem.2017-0389
14. Candow DG, Burke NC, Smith-Palmer T, Burke DG. Effect of whey and soy protein supplementation combined with resistance training in young adults. *International Journal of Sport Nutrition and Exercise Metabolism*. 2006;16:233-44.
15. Candow DG, Chilibeck PD, Facci M, Abeysekera S, Zello GA. Protein supplementation before and after resistance training in older men. *European Journal of Applied Physiology*. 2006;97:548-56.
16. Chale A, Cloutier GJ, Hau C, Phillips EM, Dallal GE, Fielding RA. Efficacy of Whey Protein Supplementation on Resistance Exercise-Induced Changes in Lean Mass, Muscle Strength, and Physical Function in Mobility-Limited Older Adults. *Journals of Gerontology Series a-Biological Sciences and Medical Sciences*. 2013;68:682-90.
17. Coburn JW, Housh DJ, Housh TJ, Malek MH, Beck TW, Cramer JT, et al. Effects of leucine and whey protein supplementation during eight weeks of unilateral resistance training. *Journal of Strength and Conditioning Research*. 2006;20:284-91. doi:10.1519/R-17925.1

18. Deibert P, Solleder F, Konig D, Vitolins MZ, Dickhuth HH, Gollhofer A, et al. Soy protein based supplementation supports metabolic effects of resistance training in previously untrained middle aged males. *Aging Male*. 2011;14:273-9. doi:10.3109/13685538.2011.565091
19. Dulac MC, Pion CH, Lemieux FC, Carvalho LP, El Hajj Boutros G, Belanger M, et al. EFFECTS OF SLOW VERSUS FAST-DIGESTED PROTEIN SUPPLEMENTATION COMBINED WITH MIXED POWER TRAINING ON MUSCLE FUNCTION AND FUNCTIONAL CAPACITIES IN OLDER MEN. *The British journal of nutrition*. 2020;1-40. doi:10.1017/S0007114520001932
20. Eliot KA, Knehans AW, Bemben DA, Witten MS, Carter J, Bemben MG. The effects of creatine and whey protein supplementation on body composition in men aged 48 to 72 years during resistance training. *Journal of Nutrition Health & Aging*. 2008;12:208-12. doi:10.1007/BF02982622
21. Erskine RM, Fletcher G, Hanson B, Foll, P. J. Whey Protein Does Not Enhance the Adaptations to Elbow Flexor Resistance Training. *Medicine and Science in Sports and Exercise*. 2012;44:1791-800.
22. Farup J, Rahbek SK, Vendelbo MH, Matzon A, Hindhede J, Bejder A, et al. Whey protein hydrolysate augments tendon and muscle hypertrophy independent of resistance exercise contraction mode. *Scandinavian journal of medicine & science in sports*. 2014;24:788-98. doi:10.1111/sms.12083
23. Gryson C, Ratel S, Rance M, Pen, o S, Bonhomme C, et al. Four-Month Course of Soluble Milk Proteins Interacts With Exercise to Improve Muscle Strength and Delay Fatigue in Elderly Participants. *Journal of the American Medical Directors Association*. 2014;15:958 e1-9. doi:10.1016/j.jamda.2014.09.011
24. Hartman JW, Tang JE, Wilkinson SB, Tarnopolsky MA, Lawrence RL, Fullerton AV, et al. Consumption of fat-free fluid milk after resistance exercise promotes greater lean mass accretion than does consumption of soy or carbohydrate in young, novice, male weightlifters. *American Journal of Clinical Nutrition*. 2007;86:373-81.
25. Haun CT, Mobley CB, Vann CG, Romero MA, Roberson PA, Mumford PW, et al. Soy protein supplementation is not androgenic or estrogenic in college-aged men when combined with resistance exercise training (vol 8, pg 11151, 2018). *Scientific Reports*. 2018;8:
26. Herda AA, Herda TJ, Costa PB, Ryan ED, Stout JR, Cramer JT. MUSCLE PERFORMANCE, SIZE, AND SAFETY RESPONSES AFTER EIGHT WEEKS OF RESISTANCE TRAINING AND PROTEIN SUPPLEMENTATION: A RANDOMIZED, DOUBLE-BLINDED, PLACEBO-CONTROLLED CLINICAL TRIAL. *Journal of Strength and Conditioning Research*. 2013;27:3091-100. doi:10.1519/JSC.0b013e31828c289f
27. Hida A, Hasegawa Y, Mekata Y, Usuda M, Masuda Y, Kawano H, et al. Effects of Egg White Protein Supplementation on Muscle Strength and Serum Free Amino Acid Concentrations. *Nutrients*. 2012;4:1504-17. doi:10.3390/nu4101504
28. Hoffman JR, Ratamess NA, Kang J, Falvo MJ, Faigenbaum AD. Effects of protein supplementation on muscular performance and resting hormonal changes in college football players. *J Sports Sci Med*. 2007;6:85-92.
29. Hoffman JR, Ratamess NA, Tranchina CP, Rashti SL, Kang J, Faigenbaum AD. Effect of Protein-Supplement Timing on Strength, Power, and Body-Composition Changes in Resistance-Trained Men. *International Journal of Sport Nutrition and Exercise Metabolism*. 2009;19:172-85. doi:10.1123/ijsnem.19.2.172
30. Iglay HB, Apolzan JW, Gerrard DE, Eash JK, Anderson JC, Campbell WW. Moderately increased protein intake predominately from egg sources does not influence whole body, regional, or muscle composition responses to resistance training in older people. *Journal of Nutrition Health & Aging*. 2009;13:108-14.

31. Kerksick CM, Rasmussen CJ, Lancaster SL, Magu B, Smith P, Melton C, et al. The effects of protein and amino acid supplementation on performance and training adaptations during ten weeks of resistance training. *Journal of Strength and Conditioning Research*. 2006;20:643-53. doi:10.1519/R-17695.1
32. Kim HH, Kim YJ, Lee SY, Jeong DW, Lee JG, Yi YH, et al. Interactive effects of an isocaloric high-protein diet and resistance exercise on body composition, ghrelin, and metabolic and hormonal parameters in untrained young men: A randomized clinical trial. *J Diabetes Investig*. 2014;5:242-7. doi:10.1111/jdi.12148
33. Kim D, Park Y. Amount of Protein Required to Improve Muscle Mass in Older Adults. *Nutrients*. 2020;12:1700. doi:10.3390/nu12061700
34. Kirmse M, Oertzen-Hagemann V, de Marees M, Bloch W, Platen P. Prolonged collagen peptide supplementation and resistance exercise training affects body composition in recreationally active men. *Nutrients*. 2019;11:1154. doi:10.3390/nu11051154
35. Leenders M, Verdijk LB, Van der Hoeven L, Van Kranenburg J, Nilwik R, Wodzig W, et al. Protein Supplementation during Resistance-Type Exercise Training in the Elderly. *Medicine and Science in Sports and Exercise*. 2013;45:542-52. doi:10.1249/MSS.0b013e318272fcd8
36. Lockwood CM, Roberts MD, Dalbo VJ, Smith-Ryan AE, Kendall KL, Moon JR, et al. Effects of Hydrolyzed Whey versus Other Whey Protein Supplements on the Physiological Response to 8 Weeks of Resistance Exercise in College-Aged Males. *Journal of the American College of Nutrition*. 2017;36:16-27. doi:10.1080/07315724.2016.1140094
37. Maesta N, Nahas EAP, Nahas-Neto J, Orsatti FL, Fernandes CE, et al. Effects of soy protein and resistance exercise on body composition and blood lipids in postmenopausal women. *Maturitas*. 2007;56:350-8. doi:10.1016/j.maturitas.2006.10.001
38. Mobley CB, Haun CT, Roberson PA, Mumford PW, Romero MA, Kephart WC, et al. Effects of Whey, Soy or Leucine Supplementation with 12 Weeks of Resistance Training on Strength, Body Composition, and Skeletal Muscle and Adipose Tissue Histological Attributes in College-Aged Males. *Nutrients*. 2017;9:doi:10.3390/nu9090972
39. Mori H, Tokuda Y. Effect of whey protein supplementation after resistance exercise on the muscle mass and physical function of healthy older women: A randomized controlled trial. *Geriatrics & Gerontology International*. 2018;18:1398-404. doi:10.1111/ggi.13499
40. Nabuco HCG, Tomeleri CM, Sugihara P, Fernandes RR, Cavalcante EF, et al. Effects of Whey Protein Supplementation Pre- or Post-Resistance Training on Muscle Mass, Muscular Strength, and Functional Capacity in Pre-Conditioned Older Women: A Randomized Clinical Trial. *Nutrients*. 2018;10:doi:10.3390/nu10050563
41. Nabuco HCG, Tomeleri CM, Sugihara P, Fernandes RR, Cavalcante EF, et al. Effects of pre- or post-exercise whey protein supplementation on body fat and metabolic and inflammatory profile in pre-conditioned older women: A randomized, double-blind, placebo-controlled trial. *Nutrition Metabolism and Cardiovascular Diseases*. 2019;29:290-300. doi:10.1016/j.numecd.2018.11.007
42. Nabuco HCG, Tomeleri CM, Sugihara P, Fernandes RR, Cavalcante EF, et al. Effect of whey protein supplementation combined with resistance training on cellular health in pre-conditioned older women: A randomized, double-blind, placebo-controlled trial. *Archives of Gerontology and Geriatrics*. 2019;82:232-7. doi:10.1016/j.archger.2019.03.007
43. Naclerio F, Seijo-Bujia M, Larumbe-Zabala E, Earnest CP. Carbohydrates Alone or Mixing With Beef or Whey Protein Promote Similar Training Outcomes in Resistance Training Males: A Double-Blind, Randomized Controlled Clinical Trial. *International Journal of Sport Nutrition and Exercise Metabolism*. 2017;27:408-20. doi:10.1123/ijnsnem.2017-0003
44. Naclerio F, Larumbe-Zabala E, Ashrafi N, Seijo M, Nielsen B, Allgrove J, et al. Effects of protein-carbohydrate supplementation on immunity and resistance training outcomes: a double-blind, randomized, controlled clinical trial. *European Journal of Applied Physiology*. 2017;117:267-77. doi:10.1007/s00421-016-3520-x

45. Nahas PC, Rossato LT, Martins FM, Souza AP, de Branco FMS, Carneiro MAS, et al. Moderate Increase in Protein Intake Promotes a Small Additional Improvement in Functional Capacity, But Not in Muscle Strength and Lean Mass Quality, in Postmenopausal Women Following Resistance Exercise: A Randomized Clinical Trial. *Nutrients*. 2019;11:
46. Nakayama K, Saito Y, Sanbongi C, Murata K, Urashima T. Effects of low-dose milk protein supplementation following low-to-moderate intensity exercise training on muscle mass in healthy older adults: a randomized placebo-controlled trial. *European Journal of Nutrition*. 2020;doi:10.1007/s00394-020-02302-4
47. Negro M, oni M, Ottobrini S, Codrons E, Correale L, Buonocore D, et al. Protein Supplementation with Low Fat Meat after Resistance Training: Effects on Body Composition and Strength. *Nutrients*. 2014;6:3040-9. doi:10.3390/nu6083040
48. Norton C, Toomey C, McCormack WG, Francis P, Saunders J, Kerin E, et al. Protein Supplementation at Breakfast and Lunch for 24 Weeks beyond Habitual Intakes Increases Whole-Body Lean Tissue Mass in Healthy Older Adults. *J Nutr*. 2016;146:65-9. doi:10.3945/jn.115.219022
49. Obradovic J, Vukadinovic Jurisic M, Rakonjac D. The effects of leucine and whey protein supplementation with eight weeks of resistance training on strength and body composition. *J Sports Med Phys Fitness*. 2020;60:864-9. doi:10.23736/S0022-4707.20.09742-X
50. Oertzen-Hagemann V, Kirmse M, Eggers B, Pfeiffer K, Marcus K, de Marees M, et al. Effects of 12 Weeks of Hypertrophy Resistance Exercise Training Combined with Collagen Peptide Supplementation on the Skeletal Muscle Proteome in Recreationally Active Men. *Nutrients*. 2019;11:doi:10.3390/nu11051072
51. Ormsbee MJ, Willingham BD, Marchant T, Binkley TL, Specker BL, Vukovich MD. Protein Supplementation During a 6-Month Concurrent Training Program: Effect on Body Composition and Muscular Strength in Sedentary Individuals. *International Journal of Sport Nutrition and Exercise Metabolism*. 2018;28:619-28. doi:10.1123/ijsnem.2018-0036
52. Orsatti FL, Maesta N, de Oliveira EP, Nahas Neto J, Burini RC, Nunes PRP, et al. Adding Soy Protein to Milk Enhances the Effect of Resistance Training on Muscle Strength in Postmenopausal Women. *Journal of dietary supplements*. 2018;15:140-52. doi:10.1080/19390211.2017.1330794
53. Ottestad I, Lovstad AT, Gjevestad GO, Hamarsl, H., Benth JS, et al. Intake of a protein-enriched milk and effects on muscle mass and strength. A 12-week randomized placebo controlled trial among community-dwelling older adults. *Journal of Nutrition Health & Aging*. 2017;21:1160-9.
54. Ozan M, Buzdagli Y, Siktar E, Ucan I. The Effect of Protein and Carbohydrate Consumption during 10-Week Strength Training on Maximal Strength and Body Composition. *International Journal of Applied Exercise Physiology*. 2020;9:161-71.
55. Paoli A, Pacelli QF, Neri M, Toniolo L, Cancellara P, Canato M, et al. Protein supplementation increases postexercise plasma myostatin concentration after 8 weeks of resistance training in young physically active subjects. *Journal of medicinal food*. 2015;18:137-43. doi:10.1089/jmf.2014.0004
56. Pihoker AA, Peterjohn AM, Trexler ET, Hirsch KR, Blue MNM, Anderson KC, et al. The effects of nutrient timing on training adaptations in resistance-trained females. *Journal of Science and Medicine in Sport*. 2019;22:472-7. doi:10.1016/j.jsams.2018.09.236
57. Planella-Farrugia C, Comas F, Sabater-Masdeu M, Moreno M, Moreno-Navarrete JM, Rovira O, et al. Circulating Irisin and Myostatin as Markers of Muscle Strength and Physical Condition in Elderly Subjects. *Frontiers in Physiology*. 2019;10:
58. Rankin JW, Goldman LP, Puglisi MJ, Nickols-Richardson SM, Earthman CP, Gwazdauskas FC. Effect of post-exercise supplement consumption on adaptations to resistance training. *Journal of the American College of Nutrition*. 2004;23:322-30. doi:10.1080/07315724.2004.10719375

59. Reidy PT, Borack MS, Markofski MM, Dickinson JM, Deer RR, Husaini SH, et al. Protein Supplementation Has Minimal Effects on Muscle Adaptations during Resistance Exercise Training in Young Men: A Double-Blind Randomized Clinical Trial. *Journal of Nutrition*. 2016;146:1660-9.
60. Rossato LT, Nahas PC, de Branco FMS, Martins FM, Souza AP, Carneiro MAS, et al. Higher Protein Intake Does Not Improve Lean Mass Gain When Compared with RDA Recommendation in Postmenopausal Women Following Resistance Exercise Protocol: A Randomized Clinical Trial. *Nutrients*. 2017;9:
61. Rozenek R, Ward P, Long S, Garhammer J. Effects of high-calorie supplements on body composition and muscular strength following resistance training. *J Sports Med Phys Fitness*. 2002;42:340-7.
62. Sharp MH, Lowery RP, Shields KA, Lane JR, Gray JL, Partl JM, et al. THE EFFECTS OF BEEF, CHICKEN, OR WHEY PROTEIN AFTER WORKOUT ON BODY COMPOSITION AND MUSCLE PERFORMANCE. *Journal of Strength and Conditioning Research*. 2018;32:2233-42. doi:10.1519/JSC.0000000000001936
63. Snijders T, Res PT, Smeets JSJ, van Vliet S, van Kranenburg J, Maase K, et al. Protein Ingestion before Sleep Increases Muscle Mass and Strength Gains during Prolonged Resistance-Type Exercise Training in Healthy Young Men. *Journal of Nutrition*. 2015;145:1178-84.
64. Spillane M, Willoughby DS. Daily Overfeeding from Protein and/or Carbohydrate Supplementation for Eight Weeks in Conjunction with Resistance Training Does not Improve Body Composition and Muscle Strength or Increase Markers Indicative of Muscle Protein Synthesis and Myogenesis in Resistance-Trained Males. *Journal of Sports Science and Medicine*. 2016;15:17-25.
65. Taylor LW, Wilborn C, Roberts MD, White A, Dugan K. Eight weeks of pre- and postexercise whey protein supplementation increases lean body mass and improves performance in Division III collegiate female basketball players. *Applied Physiology Nutrition and Metabolism*. 2016;41:249-54. doi:10.1139/apnm-2015-0463
66. van Dongen EJI, Haveman-Nies A, Doets EL, Dorhout BG, de Groot L. Effectiveness of a Diet and Resistance Exercise Intervention on Muscle Health in Older Adults: ProMuscle in Practice. *Journal of the American Medical Directors Association*. 2020;21:1065-+. doi:10.1016/j.jamda.2019.11.026
67. Vangsoe MT, Joergensen MS, Heckmann LHL, Hansen M. Effects of Insect Protein Supplementation during Resistance Training on Changes in Muscle Mass and Strength in Young Men. *Nutrients*. 2018;10:doi:10.3390/nu10030335
68. Verdijk LB, Jonkers RAM, Gleeson BG, Beelen M, Meijer K, Savelberg H, et al. Protein supplementation before and after exercise does not further augment skeletal muscle hypertrophy after resistance training in elderly men. *American Journal of Clinical Nutrition*. 2009;89:608-16.
69. Volek JS, Volk BM, Gomez AL, Kunces LJ, Kupchak BR, Freidenreich DJ, et al. Whey Protein Supplementation During Resistance Training Augments Lean Body Mass. *Journal of the American College of Nutrition*. 2013;32:122-35. doi:10.1080/07315724.2013.793580
70. Walker TB, Smith J, Herrera M, Lebegue B, Pinchak A, Fischer J. The Influence of 8 Weeks of Whey-Protein and Leucine Supplementation on Physical and Cognitive Performance. *International Journal of Sport Nutrition and Exercise Metabolism*. 2010;20:409-17. doi:10.1123/ijsnem.20.5.409
71. Watanabe K, Holobar A, Mita Y, Kouzaki M, Ogawa M, Akima H, et al. Effect of Resistance Training and Fish Protein Intake on Motor Unit Firing Pattern and Motor Function of Elderly. *Frontiers in Physiology*. 2018;9:1733. doi:10.3389/fphys.2018.01733
72. Weisgarber KD, Candow DG, Vogt ESM. Whey Protein Before and During Resistance Exercise Has No Effect on Muscle Mass and Strength in Untrained Young Adults. *International Journal of Sport Nutrition and Exercise Metabolism*. 2012;22:463-9.
73. Willoughby DS, Stout JR, Wilborn CD. Effects of resistance training and protein plus amino acid supplementation on muscle anabolism, mass, and strength. *Amino Acids*. 2007;32:467-77. doi:10.1007/s00726-006-0398-7



74. Zhu K, Kerr DA, Meng XQ, Devine A, Solah V, Binns CW, et al. Two-Year Whey Protein Supplementation Did Not Enhance Muscle Mass and Physical Function in Well-Nourished Healthy Older Postmenopausal Women. *Journal of Nutrition*. 2015;145:2520-6.
