# Supplementary material for: Systematic review and meta‐analysis of protein intake to support muscle mass and function in healthy adults
Source: PubMed Central journal article supplement — J Cachexia Sarcopenia Muscle. 2022 Feb 20;13(2):795–810. doi: 10.1002/jcsm.12922 (PMC8978023; doi:10.1002/jcsm.12922), 2022-02-20
Supplement: JCSM-13-795-s005.pdf [file JCSM-13-795-s005.pdf]

# **Systematic review and meta-analysis of protein intake to support muscle mass and function in healthy adults**

Everson A Nunes<sup>1,2</sup>, Lauren Colenso-Semple<sup>1</sup>, Sean R McKellar<sup>1</sup>, Thomas Yau<sup>1</sup>, Muhammad Usman Ali<sup>3</sup>, Donna Fitzpatrick-Lewis<sup>3</sup>, Diana Sherifali<sup>4</sup>, Claire Gaudichon<sup>5</sup>, Daniel Tomé<sup>5</sup>, Philip J Atherton<sup>6</sup>, Maria Camprubi Robles<sup>7</sup>, Sandra Naranjo-Modad<sup>8</sup>, Michelle Braun<sup>9</sup>, Francesco Landi<sup>10</sup> and Stuart M Phillips<sup>1\*</sup>

<sup>1</sup> Exercise Metabolism Research Group, Department of Kinesiology, McMaster University, Hamilton, L8S 4L8, ON, Canada.

<sup>2</sup>Laboratory of Investigation of Chronic Diseases, Department of Physiological Sciences, Federal University of Santa Catarina, Florianópolis, 88040-900, SC, Brazil.

<sup>3</sup>McMaster Evidence Review and Synthesis Centre, McMaster University, Hamilton, L8S 4L8, ON, Canada.

<sup>4</sup>School of Nursing, Faculty of Health Sciences, McMaster University, Hamilton, L8S 4L8, ON, Canada.

<sup>5</sup>Université Paris-Saclay, AgroParisTech, INRAE, UMR PNCA, 75005 Paris, France

<sup>6</sup>MRC Versus Arthritis Centre of Excellence for Musculoskeletal Ageing Research (CMAR), NIHR Biomedical Research Centre, School of Medicine, University of Nottingham, Nottingham, NG7 2RD, England.

<sup>7</sup>Abbott Nutrition, Research and Development, Granada, Spain

<sup>8</sup>Givaudan, Research and Development, Avignon, France

<sup>9</sup>International Flavors & Fragrances, Research and Development, St. Louis, MO, USA

<sup>10</sup>Geriatric Internal Medicine Unit of the Geriatrics Department of the A. Gemelli University Hospital, Rome, IT

\* Corresponding author: S. M. Phillips, [phillis@mcmaster.ca](mailto:phillis@mcmaster.ca) and [publications@ilsieurope.be](mailto:publications@ilsieurope.be); Tel.: +1-905-525-9140 (ext. 24465). Mailing address: Department of Kinesiology, Ivor Wynne Centre, McMaster University, 1280 Main St. West, Hamilton, ON L8S 4L8.

## Sensitivity analysis

Supplementary table 6 – Sensitivity analysis lean body mass

| <b>Lean Body Mass</b>                                                                                  | <b>Main-effects</b> | <b>IC95%</b>      |
|--------------------------------------------------------------------------------------------------------|---------------------|-------------------|
| <b><i>Meta-analysis results - All RCT</i></b>                                                          | <b>0.22</b>         | <b>0.15:0.30</b>  |
| <i>Results excluding a given study</i>                                                                 |                     |                   |
| Taylor et al. 2016                                                                                     | 0.21                | 0.14:0.29         |
| Willoughby et al. 2007                                                                                 | 0.21                | 0.14:0.28         |
| <b><i>Meta-analysis results – RCT with Resistance Exercise(RE)</i></b>                                 | <b>0.22</b>         | <b>0.14:0.30</b>  |
| <i>Results excluding a given study</i>                                                                 |                     |                   |
| Taylor et al. 2016                                                                                     | 0.21                | 0.14:0.29         |
| Willoughby et al. 2007                                                                                 | 0.21                | 0.13:0.28         |
| <b><i>Meta-analysis results – RCT with RE by Age (Young)</i></b>                                       | <b>0.26</b>         | <b>0.16:0.35</b>  |
| <i>Results excluding a given study</i>                                                                 |                     |                   |
| Taylor et al. 2016                                                                                     | 0.25                | 0.15:0.34         |
| Willoughby et al. 2007                                                                                 | 0.24                | 0.15:0.33         |
| <b><i>Meta-analysis results – RCT with RE reporting protein ingestion</i></b>                          | <b>0.19</b>         | <b>0.11:0.28</b>  |
| <i>Results excluding a given study</i>                                                                 |                     |                   |
| Taylor et al. 2016                                                                                     | 0.19                | 0.10:0.27         |
| Willoughby et al. 2007                                                                                 | 0.18                | 0.10:0.26         |
| <b><i>Meta-analysis results – RCT with RE reporting protein ingestion (1.2-1.59g/kg/day) Young</i></b> | <b>0.15</b>         | <b>-0.02:0.31</b> |
| <i>Results excluding a given study</i>                                                                 |                     |                   |
| Taylor et al. 2016                                                                                     | 0.12                | -0.04:0.28        |
| <b><i>Meta-analysis results – RCT with RE reporting protein ingestion (1.2-1.59g/kg/day) Old</i></b>   | <b>0.20</b>         | <b>0.02:0.37</b>  |
| <i>Results excluding a given study</i>                                                                 |                     |                   |
| Nakayama et al. 2020                                                                                   | 0.12                | <b>-0.08:0.32</b> |
| van Dongen et al. 2020                                                                                 | 0.23                | 0.02:0.44         |

Supplementary table 7 – Sensitivity analysis bench press strength

| <b>Bench Press Strength</b>                                                                                | <b>Main-effects</b> | <b>IC95%</b>             |
|------------------------------------------------------------------------------------------------------------|---------------------|--------------------------|
| <b><i>Meta-analysis results - All RCT</i></b>                                                              | <b><i>0.20</i></b>  | <b><i>0.06:0.34</i></b>  |
| <i>Results excluding a given study</i>                                                                     |                     |                          |
| Obradovic et al. 2020                                                                                      | 0.17                | 0.05:0.30                |
| Taylor et al. 2016                                                                                         | 0.19                | 0.05:0.32                |
| Vangsoe et al. 2018                                                                                        | 0.22                | 0.09:0.34                |
| Willoughby et al. 2007                                                                                     | 0.17                | 0.05:0.30                |
| <b><i>Meta-analysis results – RCT with Resistance Exercise(RE)</i></b>                                     | <b><i>0.18</i></b>  | <b><i>0.04:0.32</i></b>  |
| <i>Results excluding a given study</i>                                                                     |                     |                          |
| Obradovic et al. 2020                                                                                      | 0.15                | 0.03:0.28                |
| Taylor et al. 2016                                                                                         | 0.17                | 0.04:0.30                |
| Vangsoe et al. 2018                                                                                        | 0.20                | 0.07:0.32                |
| Willoughby et al. 2007                                                                                     | 0.15                | 0.03:0.28                |
| <b><i>Meta-analysis results – RCT with RE reporting protein ingestion</i></b>                              | <b><i>0.15</i></b>  | <b><i>0.02:0.28</i></b>  |
| <i>Results excluding a given study</i>                                                                     |                     |                          |
| Taylor et al. 2016                                                                                         | 0.13                | 0.01:0.26                |
| Vangsoe et al. 2018                                                                                        | 0.16                | 0.05:0.28                |
| Willoughby et al. 2007                                                                                     | 0.12                | 0.01:0.24                |
| <b><i>Meta-analysis results – RCT with RE reporting protein ingestion between 1.2 and 1.59/kg/day)</i></b> | <b><i>0.17</i></b>  | <b><i>-0.01:0.35</i></b> |
| <i>Results excluding a given study</i>                                                                     |                     |                          |
| Taylor et al. 2016                                                                                         | 0.14                | -0.02:0.31               |
| <b><i>Meta-analysis results – RCT with RE reporting protein ingestion (≥1.6g/kg/day)</i></b>               | <b><i>0.13</i></b>  | <b><i>-0.15:0.41</i></b> |
| <i>Results excluding a given study</i>                                                                     |                     |                          |
| Vangsoe et al. 2018                                                                                        | 0.17                | <b>0.00:0.34</b>         |
| Willoughby et al. 2007                                                                                     | 0.08                | -0.08:0.25               |

**Supplementary table 8 – Sensitivity analysis lower body strength**

| <b>Lower body Strength</b>                                                            | <b>Main-effects</b> | <b>IC95%</b>      |
|---------------------------------------------------------------------------------------|---------------------|-------------------|
| <i>Meta-analysis results - All RCT</i>                                                | <b>0.20</b>         | <b>0.08:0.33</b>  |
| <i>Results excluding a given study</i>                                                |                     |                   |
| Aas et al. 2020                                                                       | 0.18                | 0.06:0.30         |
| Burke et al. 2001                                                                     | 0.18                | 0.06:0.30         |
| Chale et al. 2013                                                                     | 0.21                | 0.08:0.34         |
| Obradovic et al. 2020                                                                 | 0.18                | 0.06:0.29         |
| <i>Meta-analysis results – RCT with Resistance Exercise(RE)</i>                       | <b>0.21</b>         | <b>0.08:0.34</b>  |
| <i>Results excluding a given study</i>                                                |                     |                   |
| Aas et al. 2020                                                                       | 0.19                | 0.06:0.30         |
| Burke et al. 2001                                                                     | 0.18                | 0.06:0.31         |
| Chale et al. 2013                                                                     | 0.22                | 0.08:0.35         |
| Obradovic et al. 2020                                                                 | 0.18                | 0.06:0.30         |
| <i>Meta-analysis results – RCT with RE by Age</i>                                     | <b>0.19</b>         | <b>0.03:0.36</b>  |
| <i>Results excluding a given study</i>                                                |                     |                   |
| Burke et al. 2001                                                                     | 0.16                | <b>-0.00:0.32</b> |
| Obradovic et al. 2020                                                                 | 0.15                | 0.00:0.30         |
| <i>Meta-analysis results – RCT with RE reporting protein ingestion (≥1.6g/kg/day)</i> | <b>0.40</b>         | <b>0.23:0.57</b>  |
| <i>Results excluding a given study</i>                                                |                     |                   |
| Burke et al. 2001                                                                     | 0.34                | 0.22:0.47         |

**Supplementary table 9 – Sensitivity analysis handgrip strength**

| <b>Handgrip</b>                        | <b>Main-effects</b> | <b>IC95%</b>      |
|----------------------------------------|---------------------|-------------------|
| <i>Meta-analysis results</i>           | <i>0.15</i>         | <i>-0.03:0.32</i> |
| <i>Results excluding a given study</i> |                     |                   |
| Zhu et al. 2015                        | 0.16                | -0.03:0.35        |
| Nakayama et al. 2020                   | 0.11                | -0.07:0.28        |

**Supplementary table 10 – Sensitivity analysis physical function**

| <b>Physical Function</b>               | <b>Main-effects</b> | <b>IC95%</b>     |
|----------------------------------------|---------------------|------------------|
| <i>Meta-analysis results</i>           | <i>0.15</i>         | <i>0.00:0.29</i> |
| <i>Results excluding a given study</i> |                     |                  |
| Aas et al., 2020                       | 0.13                | 0.02:0.25        |
| Nahas et al., 2019                     | 0.14                | 0.03:0.25        |
| Nakayama et a., 2020                   | 0.14                | 0.04:0.24        |
| Van Dongen et al., 2020                | 0.14                | 0.01:0.26        |
